# Supplementary material for: Stereoselective sulfenylation of oxindole-derived propargyl alcohols to access sulfenylated-3-alkenyloxindoles
Source: Royal Society of Chemistry journal article supplement (doi:10.1039/d1ob01921j), 2021-01-01
Supplement: d1ob01921j1.pdf [file d1ob01921j1.pdf]

# Stereoselective Sulfenylation of Oxindole-derived Propargyl Alcohols to access Sulfenylated-3-Alkenyloxindoles

| Table of Contents                           | Page no |
|---------------------------------------------|---------|
| 1. General Information                      | S1      |
| 4. X-ray Data and Crystal Structures        | S2-S3   |
| 5. Spectral Copies of Synthesized Compounds | S4-S37  |

## General Information:

All solvents used were of analytical grade and used as purchased without further purification. Reactions were monitored by thin-layer chromatography (TLC). Visualization of the spots on TLC plates was done under UV light. Commercial silica gel (60-120 and 100-200 mesh size) was used for column chromatography.  $^1\text{H}$ s were recorded in  $\text{CDCl}_3$  and  $^{13}\text{C}$  NMR samples were recorded in  $\text{CDCl}_3$ , and 1-2 drops of  $\text{DMSO}-d_6$ , chemical shifts are expressed in parts per million ( $\delta$ ) scale using tetramethylsilane as an internal standard. The standard abbreviations s, d, dd, t, and m refer to singlet, doublet, and doublet of doublet, triplet, and multiplet respectively. Coupling constants ( $J$ ) have been reported in Hz. Oxindole derived propargyl alcohols synthesized using a reported procedure. Isatins, alkynes,  $\text{KO}^t\text{Bu}$ , thiophenols, 2-naphthalenethiol, 1-naphthalenethiols,  $\text{Ca}(\text{OTf})_2$ ,  $\text{Bu}_4\text{NPF}_6$  and other reagents required were purchased from Sigma-Aldrich, Alfa Aesar, Spectrochem, TCI Chemicals and Avra Synthesis. Solvents and silica gel (60–120 mesh) and other common reagents were procured from local suppliers. Thin-layer chromatography (TLC) was carried out on Merck silica gel plates (60 F254).  $^1\text{H}$  and  $^{13}\text{C}\{^1\text{H}\}$  NMR were recorded on a Bruker Ultrashield 500 and 400 MHz or Bruker Ascend 500 MHz instrument. Melting points were measured with a MEPA LABINDIA melting point apparatus. Single-crystal X-ray diffraction data were collected in Bruker D8-Quest diffractometers.

## Data for Single X-Ray Crystal Structure 3a:

Vapour diffusion crystallization method was used for crystal growth for **3a**, where compound was dissolved in chloroform by heating to make saturated solution in small vial which was placed in closed bottle with other solvent as *n*-hexane.

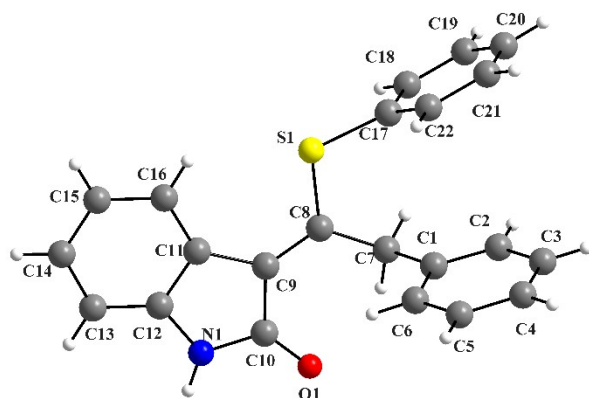

**Figure S1.** ORTEP representation of compound **3a** and thermal ellipsoids are drawn with 50% probability.

### Crystal data and structure refinement for **3a**:

|                        |                                                                                                                                 |
|------------------------|---------------------------------------------------------------------------------------------------------------------------------|
| Identification code    | ysr32a                                                                                                                          |
| Empirical formula      | C <sub>22</sub> H <sub>17</sub> NOS                                                                                             |
| Formula weight         | 343.42                                                                                                                          |
| Temperature            | 293 K                                                                                                                           |
| Wavelength             | 0.71073 Å                                                                                                                       |
| Crystal system         | 'Triclinic'                                                                                                                     |
| Space group            | P 1 21/c 1                                                                                                                      |
| Unit cell dimensions   | a = 7.472 (2) Å $\alpha$ = 115.159(12).<br>b = 10.980 (3) Å $\beta$ = 102.060 (13).<br>c = 12.170 (4) Å $\gamma$ = 95.668 (13). |
| Volume                 | 863.7 (5)                                                                                                                       |
| Z                      | 2                                                                                                                               |
| Density                | 1.320 Mg/m <sup>3</sup>                                                                                                         |
| Absorption coefficient | 0.196 mm <sup>-1</sup>                                                                                                          |

|                                   |                                    |
|-----------------------------------|------------------------------------|
| F(000)                            | 36.0                               |
| Crystal size                      | 0.16 x 0.14 x 0.12 mm <sup>3</sup> |
| Theta range for data collection   | 2.852 to 27.750.                   |
| Index ranges                      | -9<=h<=9,-14<=k<=14,-15<=l<=15     |
| Reflections collected             | 27526                              |
| Independent reflections           | 1946 [R(int) = 0.0779]             |
| restraints / parameters           | 0/226                              |
| Goodness-of-fit on F <sup>2</sup> | 1.076                              |
| Final R indices [I>2sigma(I)]     | R1 = 0.0779, wR2 = 0.1640          |
| CCDC number                       | 2109891                            |

# Spectral copies:

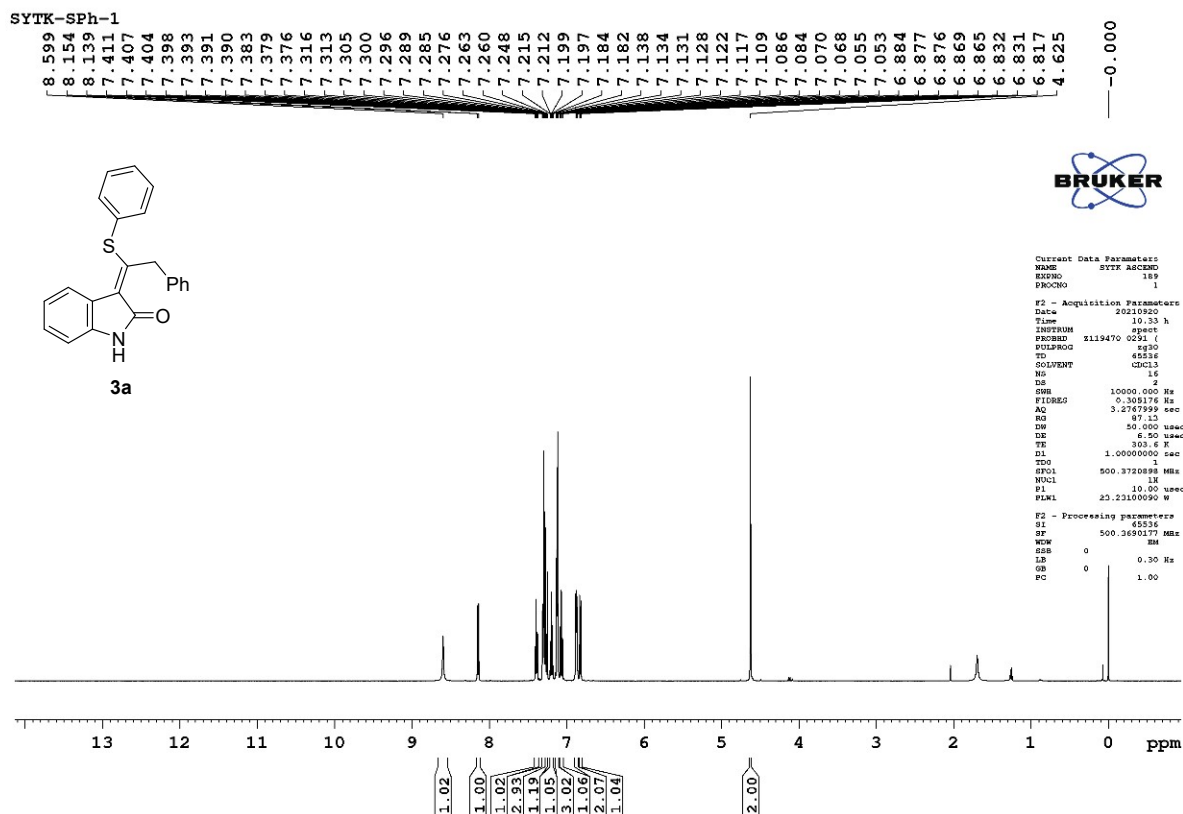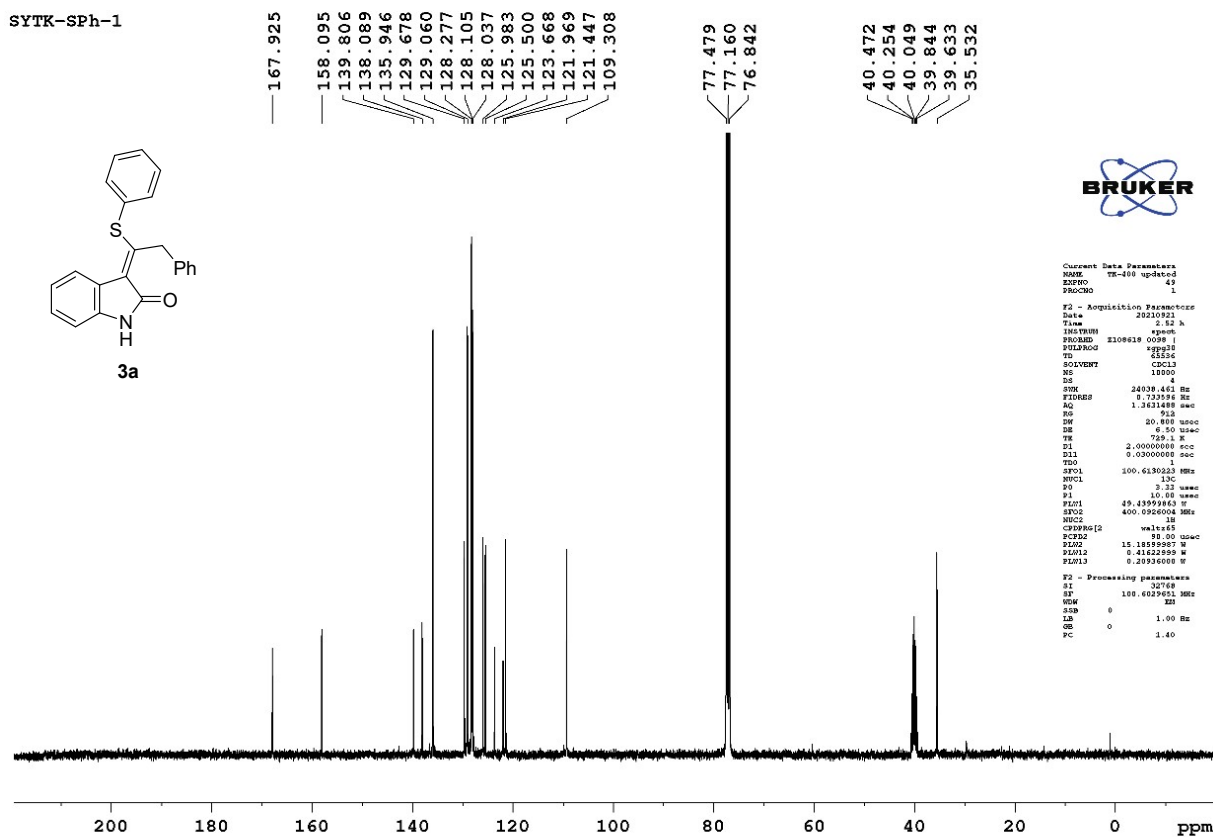



SYTK-SPh-1

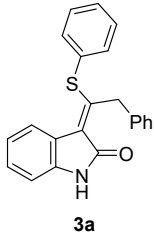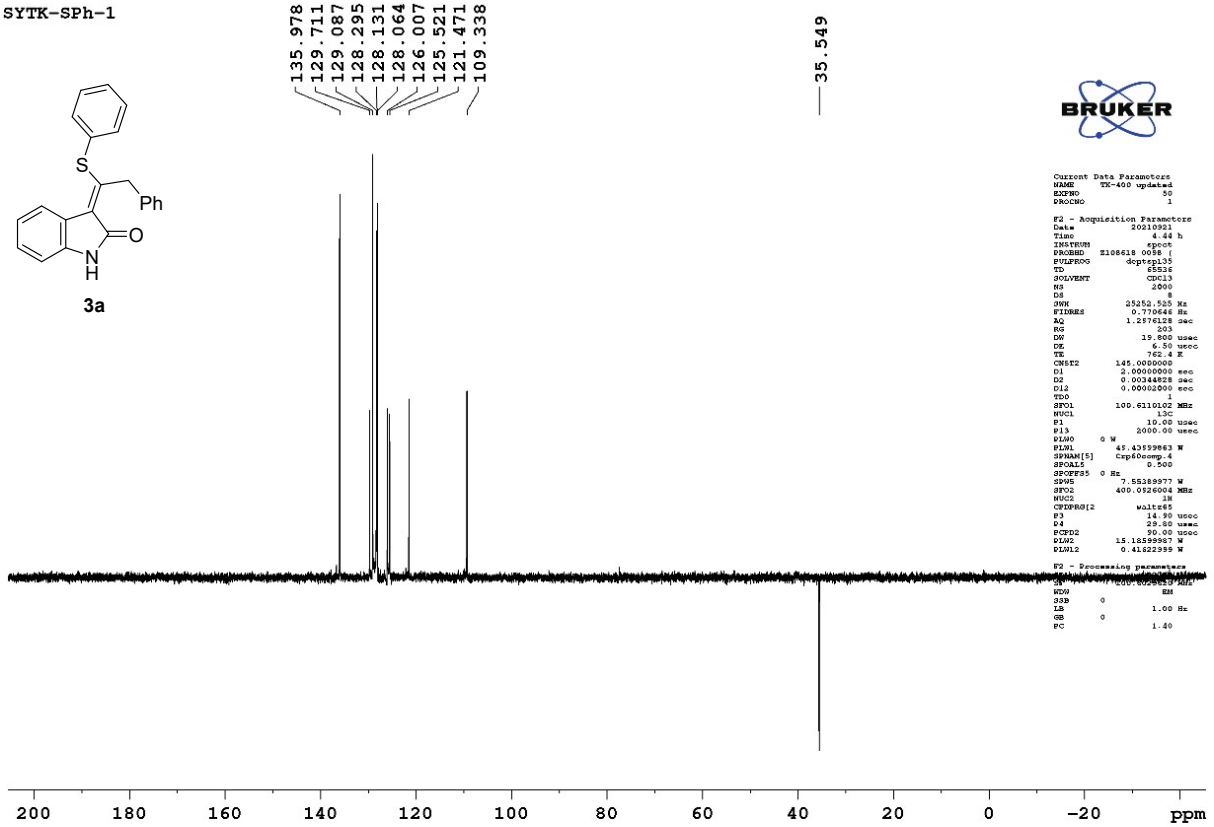

SYTK-71 B

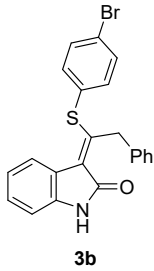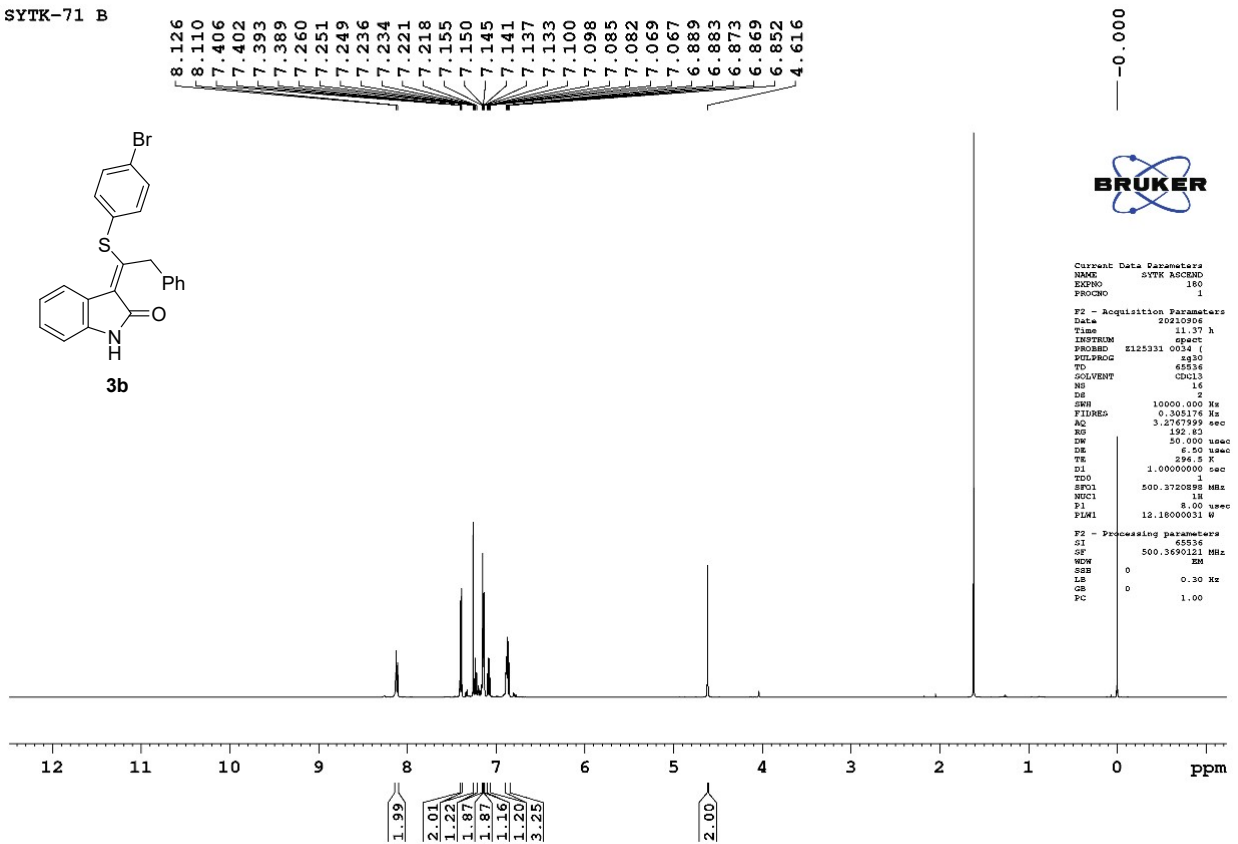

SYTK-71 B

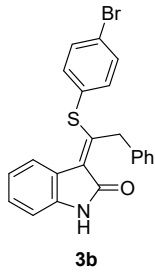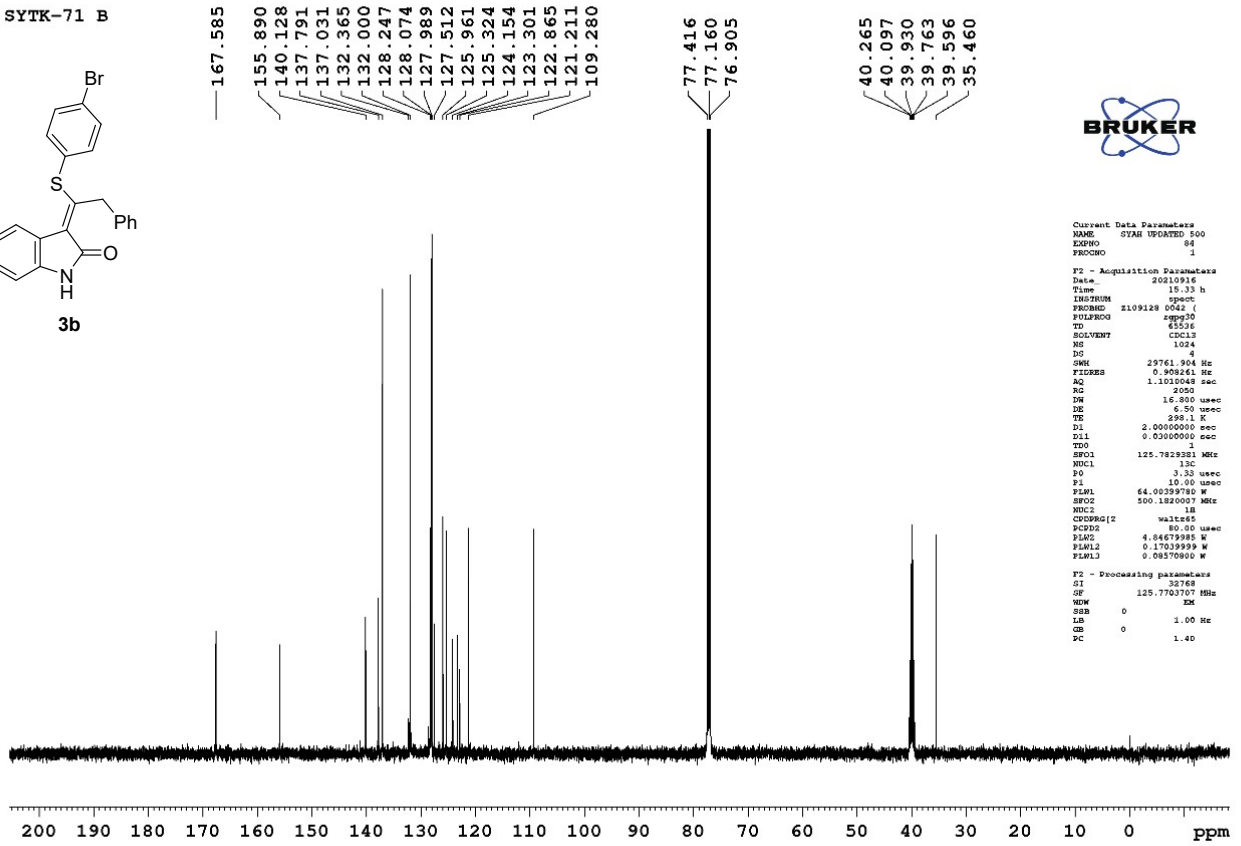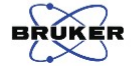

SYPR-SC-4-301

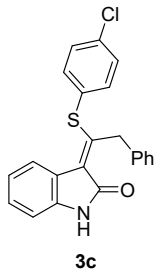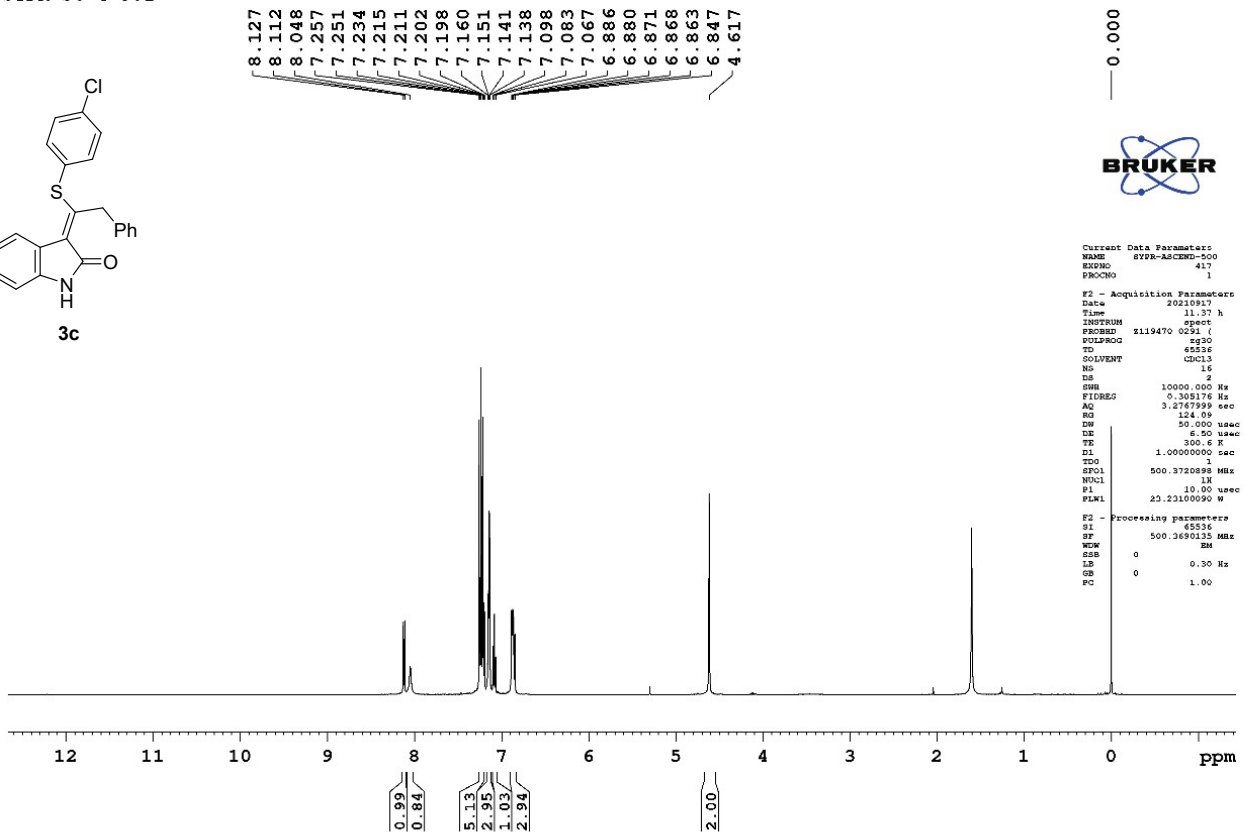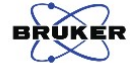

SYPR- SC-4-301

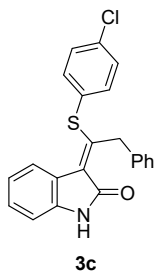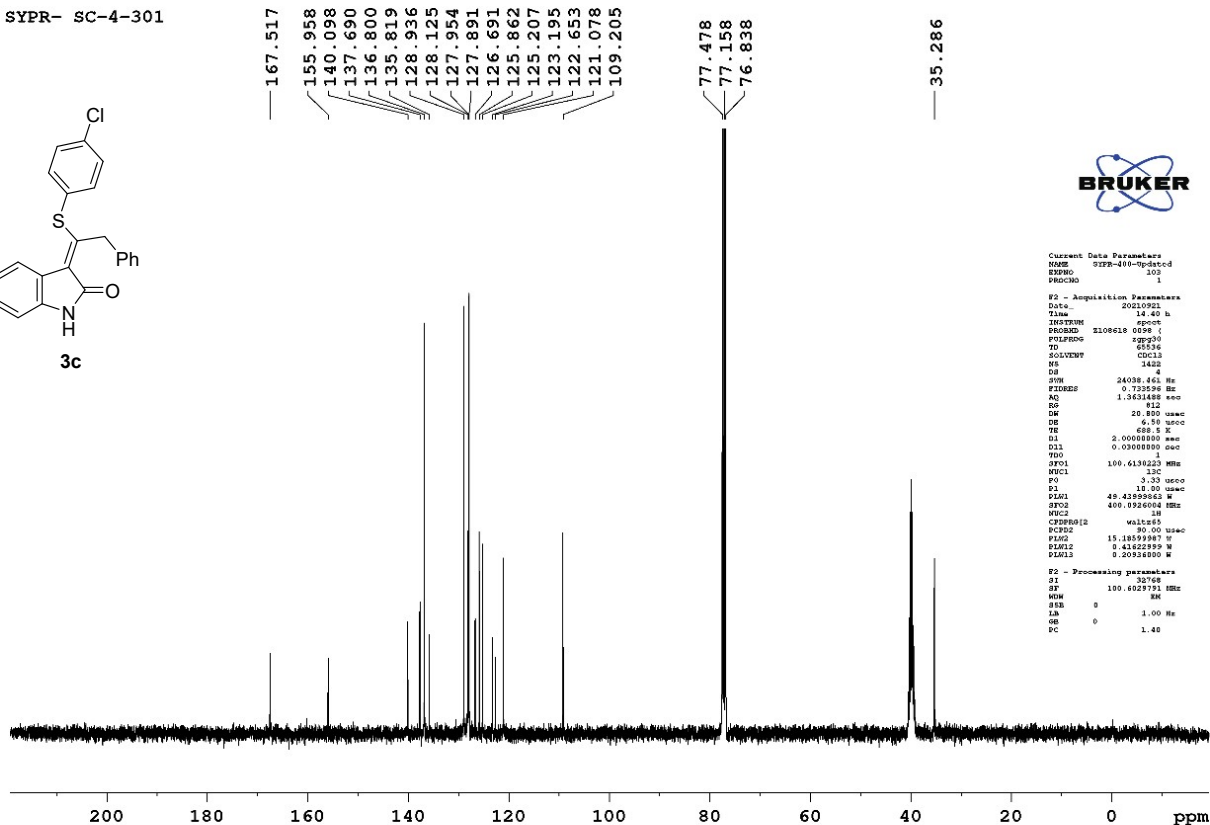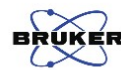

Current Data Parameters  
NAME SYPR-400-Updated  
EXPNO 1  
PROCNO 1

F2 - Acquisition Parameters  
Date\_ 20210921  
Time 14.40 h  
INSTRUM spect  
PROBHD 110618 059 (1  
PULPROG zgpg30  
TD 65536  
SOLVENT CDCl3  
NS 1422  
DS 4  
SW 24038.461 Hz  
FIDRES 0.732296 Hz  
AQ 1.3631488 sec  
RG 812  
DM 20.800 usac  
DE 6.50 usac  
TE 68.5 K  
D1 2.0000000 sec  
D11 0.0300000 sec  
TPO 1  
SFO1 100.6136223 MHz  
NUC1 13C  
P1 3.33 usac  
D1 15.00 usac  
SFO2 49.416006163 MHz  
SFO3 400.0926004 MHz  
NUC2 1H  
CPRPR012 waltz165  
DPR2 90.00 usac  
PLN2 15.18599987 W  
PLM2 0.41622959 W  
PLM13 0.20934000 W

F2 - Processing parameters  
SI 32768  
SF 100.6029791 MHz  
WDW EM  
SSB 0  
LB 1.00 Hz  
GB 0  
PC 1.40

202-2

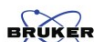

Current Data Parameters  
NAME 202-2  
EXPNO 1  
PROCNO 1

F2 - Acquisition Parameters  
Date\_ 20210921  
Time 14.25 h  
INSTRUM spect  
PROBHD 110618 059 (1  
PULPROG zgpg30  
TD 65536  
SOLVENT CDCl3  
NS 1422  
DS 4  
SW 24038.461 Hz  
FIDRES 0.732296 Hz  
AQ 1.3631488 sec  
RG 812  
DM 20.800 usac  
DE 6.50 usac  
TE 68.5 K  
D1 2.0000000 sec  
D11 0.0300000 sec  
TPO 1  
SFO1 100.6136223 MHz  
NUC1 13C  
P1 3.33 usac  
D1 15.00 usac  
SFO2 49.416006163 MHz  
SFO3 400.0926004 MHz  
NUC2 1H  
CPRPR012 waltz165  
DPR2 90.00 usac  
PLN2 15.18599987 W  
PLM2 0.41622959 W  
PLM13 0.20934000 W

F2 - Processing parameters  
SI 32768  
SF 100.6029791 MHz  
WDW EM  
SSB 0  
LB 1.00 Hz  
GB 0  
PC 1.40

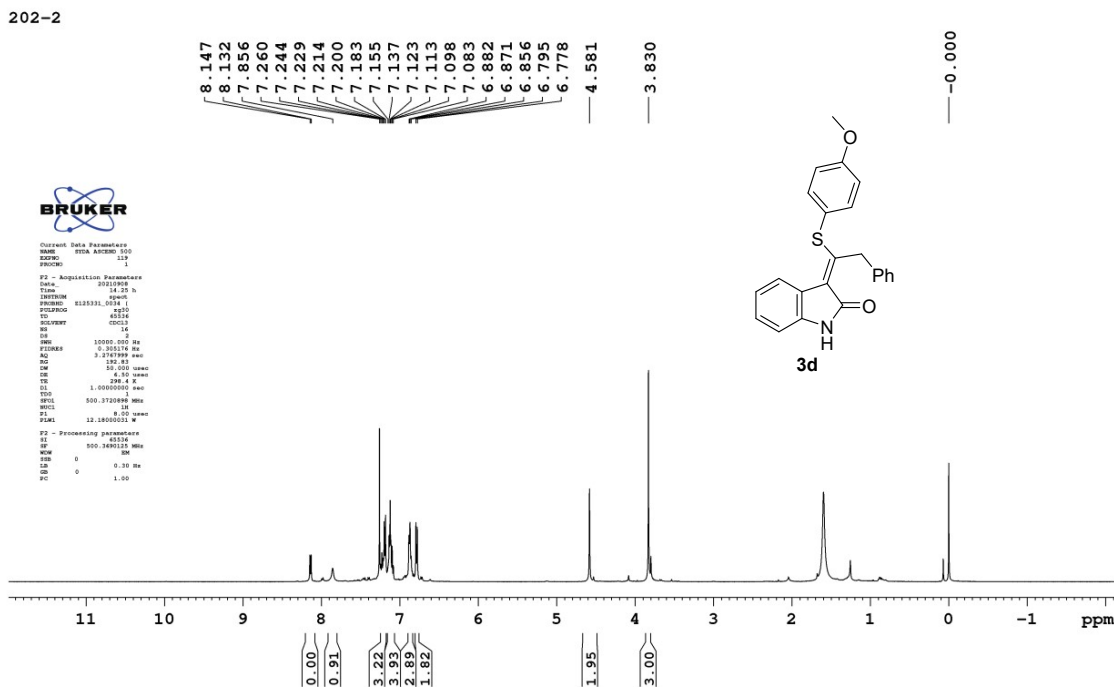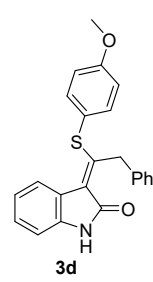

SYDA-202-2

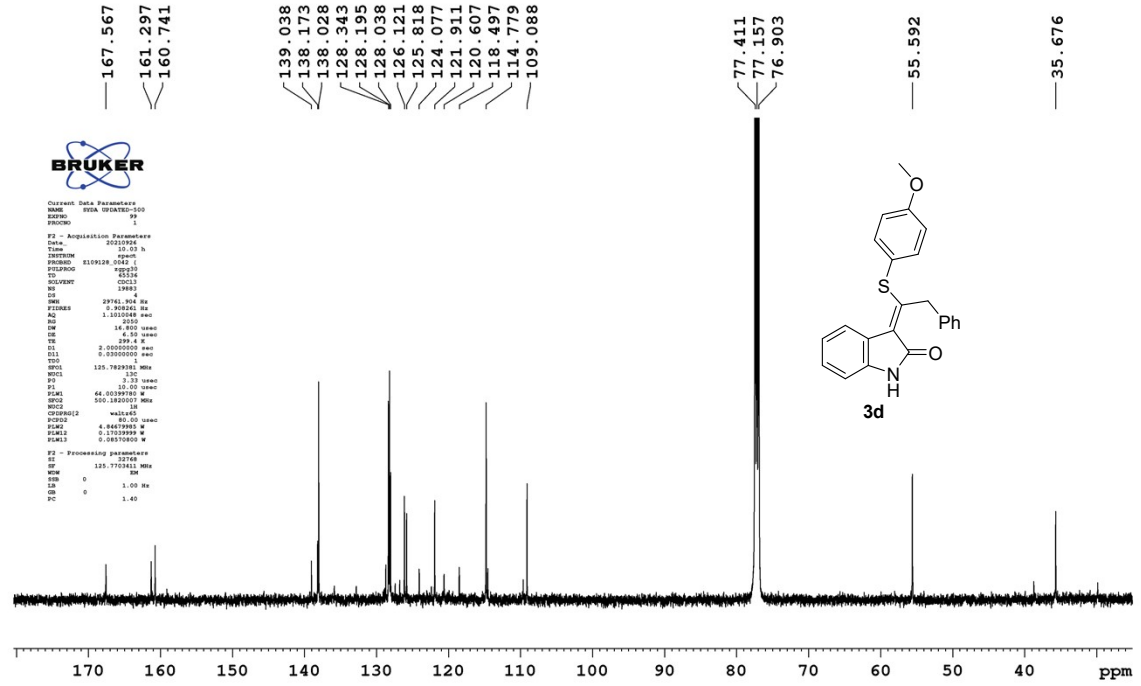

YSR ALI-C3

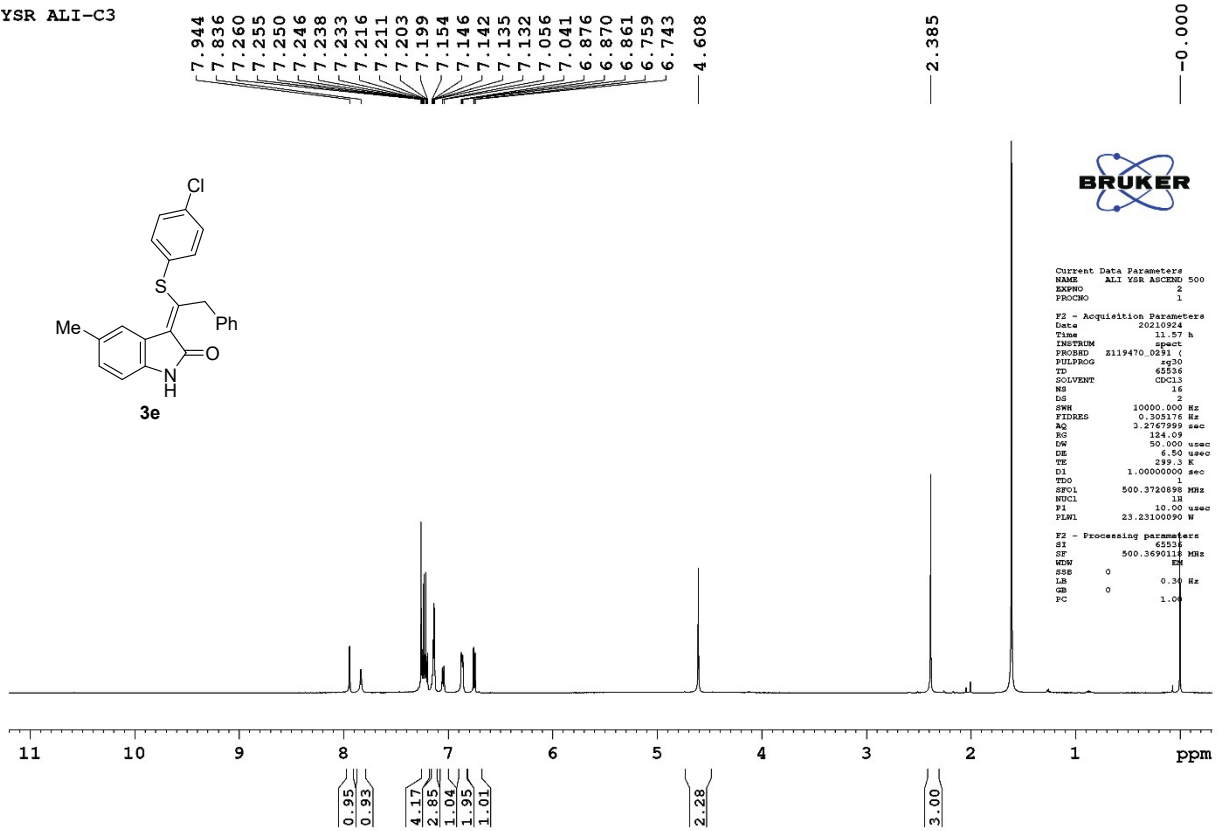

SY ALI -C3

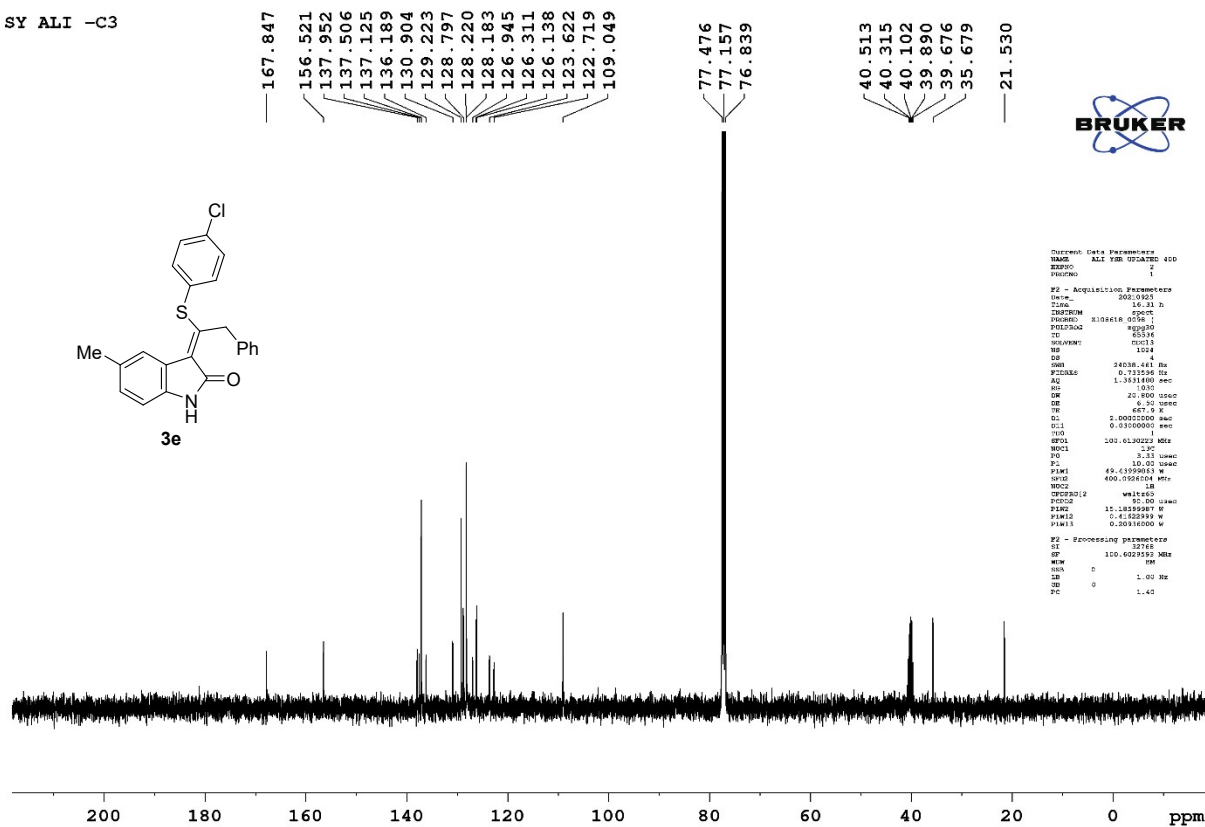

SYPR- 3f-DA-2

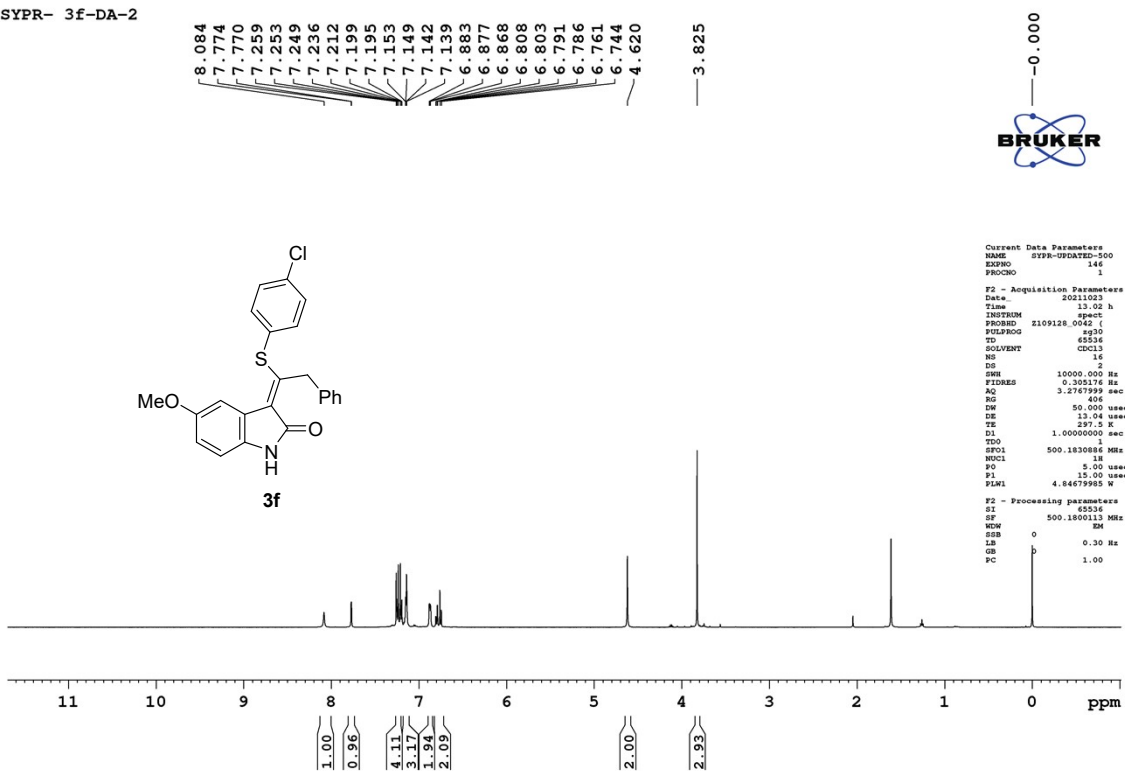

SYPR- 3f-DA-2

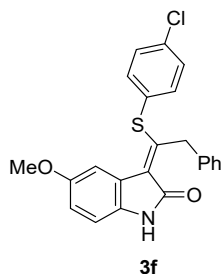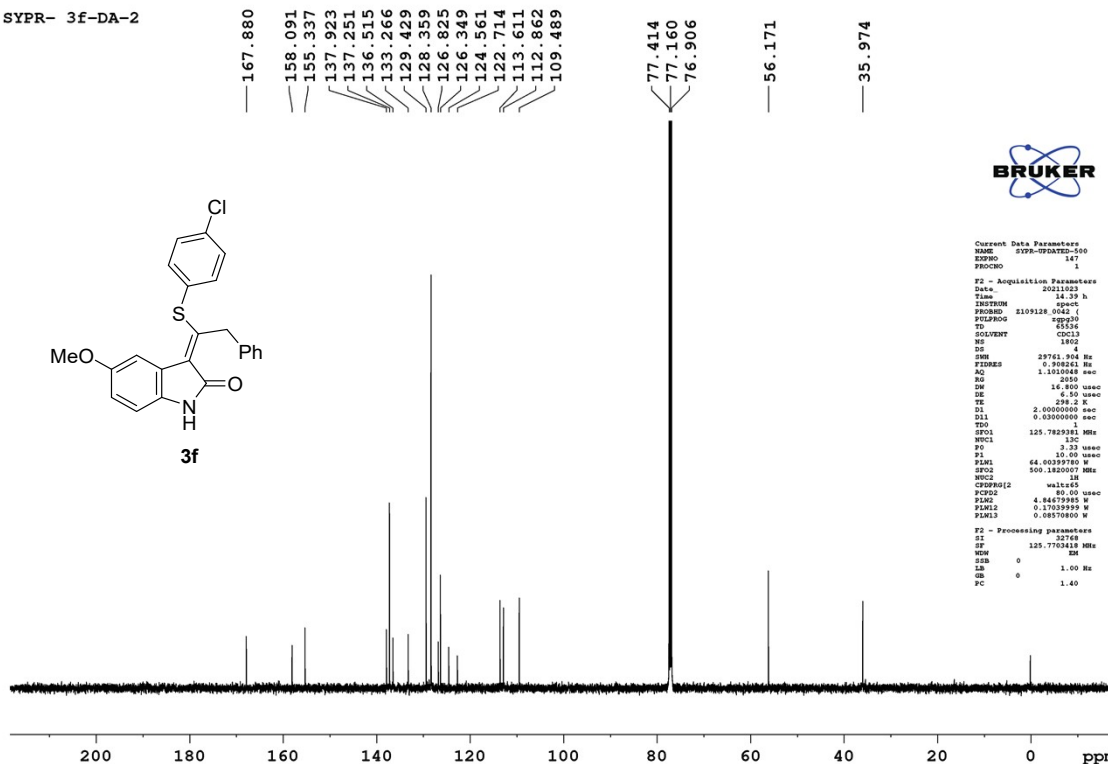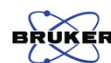

Current Data Parameters  
NAME SYPR-UPGATED-500  
EXPNO 147  
PROCNO 1

F2 - Acquisition Parameters  
Date\_ 20211023  
Time 14:39 h  
INSTRUM spect  
PROBHD 1H09128.0042 (1  
PULPROG zgpg30  
TD 65536  
SOLVENT CDCl3  
NS 1802  
DS 2  
SWH 29761.904 Hz  
FIDRES 0.298281 Hz  
AQ 1.1010248 sec  
RG 3200  
DE 16.800 usac  
TE 298.2 K  
D1 2.0000000 sec  
D11 0.0300000 sec  
TD0 1  
SFO1 125.7629381 MHz  
NUC1 13C  
P1 130  
PC 150.000 usac  
FREQ1 84.8697888 MHz  
SFO2 500.1820007 MHz  
NUC2 1H  
CPRP02(1) waltz165  
PCPD2 85.00 usac  
PLM2 4.84679985 W  
PLM12 0.17039999 W  
PLM13 0.08570800 W

F2 - Processing parameters  
SI 2748  
SF 125.7703418 MHz  
WDW EM  
SSB 0  
LB 1.00 Hz  
GB 0  
PC 1.40

SYPR-4-302-S2

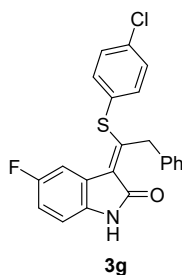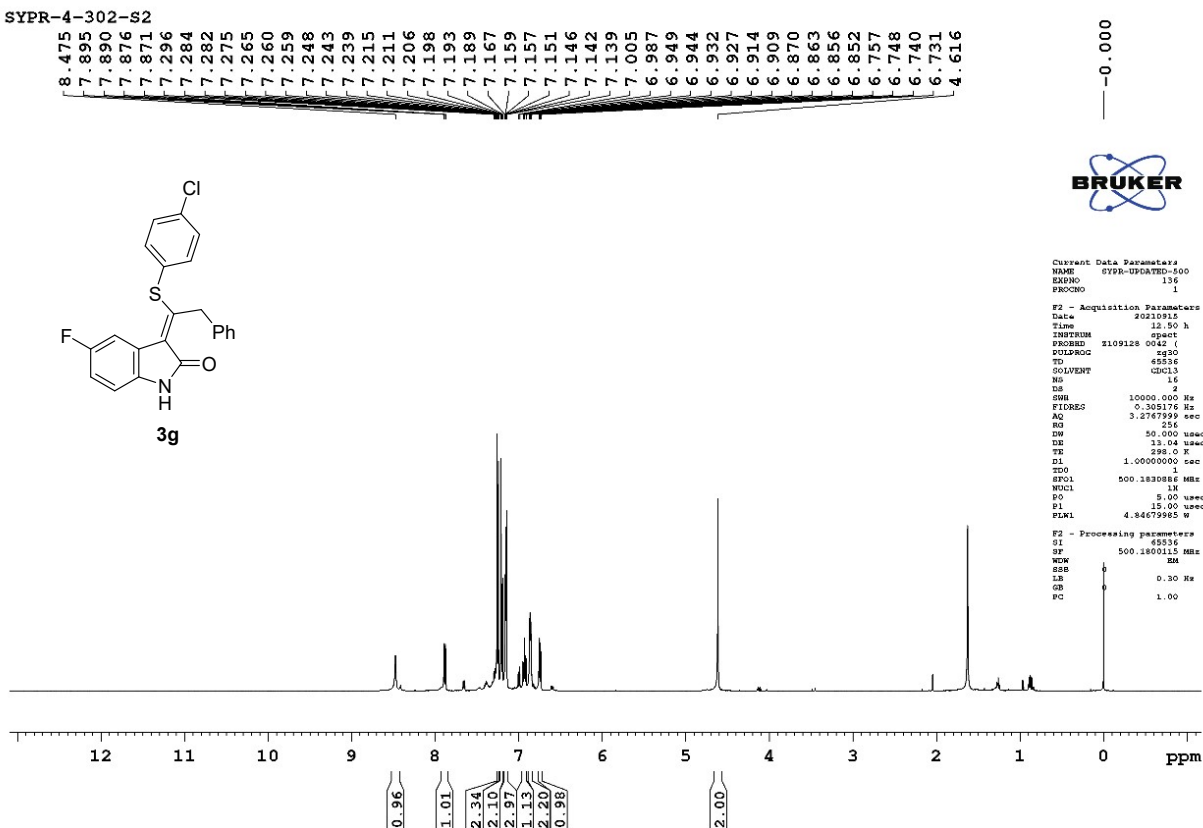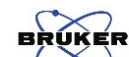

Current Data Parameters  
NAME SYPR-UPGATED-500  
EXPNO 136  
PROCNO 1

F2 - Acquisition Parameters  
Date\_ 20210915  
Time 12:50 h  
INSTRUM spect  
PROBHD 1H09128.0042 (1  
PULPROG zgpg30  
TD 65536  
SOLVENT CDCl3  
NS 18  
DS 2  
SWH 10000.000 Hz  
FIDRES 0.305176 Hz  
AQ 3.2767999 sec  
RG 320  
DE 16.800 usac  
TE 298.2 K  
D1 1.0000000 sec  
D11 0.0300000 sec  
TD0 1  
SFO1 500.1820007 MHz  
NUC1 1H  
P1 150.000 usac  
FREQ1 500.1800115 MHz  
PLM1 4.84679985 W

F2 - Processing parameters  
SI 65336  
SF 500.1800115 MHz  
WDW EM  
SSB 0  
LB 0.30 Hz  
GB 0  
PC 1.00

SYPR-4-302 -S2

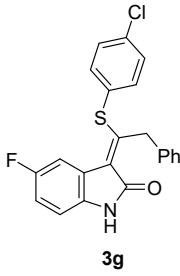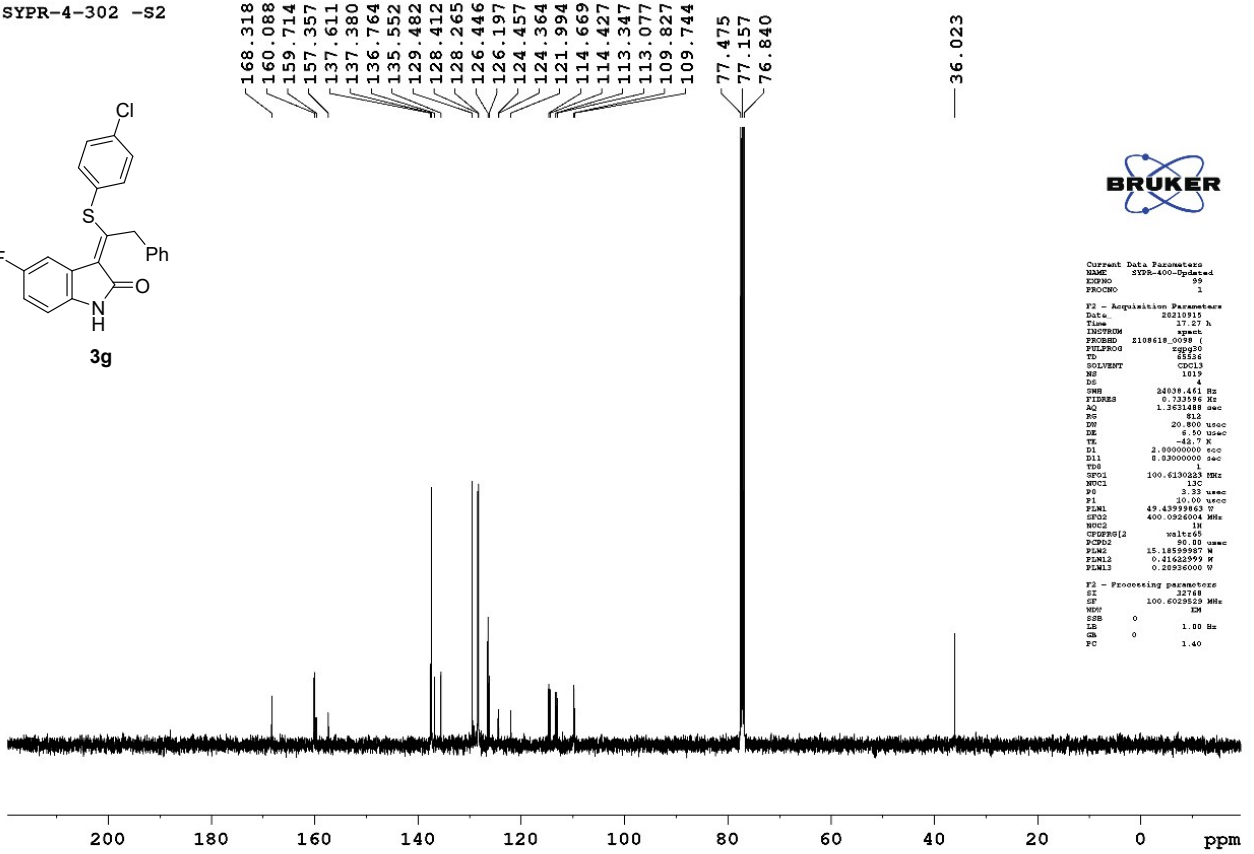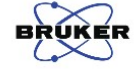

```

Current Data Parameters
NAME      SYPR-400-Updated
EXPNO    1
PROCNO   1

F2 - Acquisition Parameters
Date_    20210915
Time     17:57 A
INSTRUM  spect
PROBHD   1H601
PULPROG  zgpg30
TD        65536
SOLVENT  CDCl3
NS        411
DS        4
SWH       24938.461 Hz
FIDRES   0.733596 Hz
AQ        1.303489 sec
RG        818
DW        20.000 usec
DE        6.50 usec
TE        300.2 K
D1        2.00000000 sec
D11       0.03000000 sec
TDO       1
SFO1      100.6130253 MHz
NUC1      13C
P1         3.33 usec
PI         30.00 usec
FDM1      49.43999863 Hz
SFO2      400.0000000 MHz
NUC2      1H
CFPRG2    waltz16
PCPD2     30.00 usec
P1M2      15.18558987 Hz
P1M13     0.21625999 Hz
P1M13     0.20250000 Hz

F2 - Processing parameters
SI         32768
SF         100.6030253 MHz
WDW        DM
SSB        0
LB         1.00 Hz
GB         0
PC         1.40
    
```

SYPR-4-294-S2

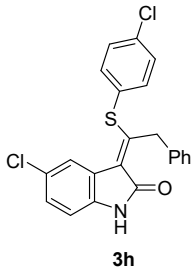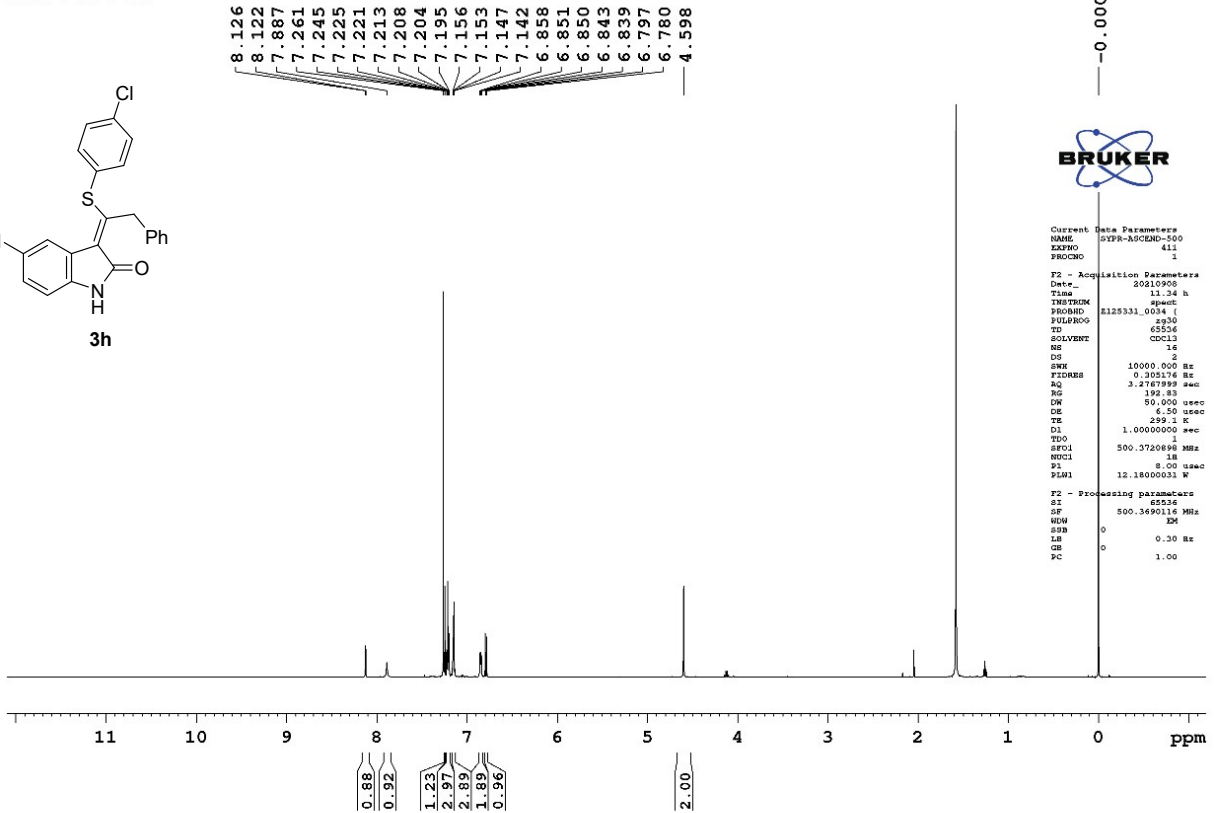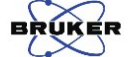

```

Current Data Parameters
NAME      SYPR-ACCEM-500
EXPNO    1
PROCNO   1

F2 - Acquisition Parameters
Date_    20210905
Time     11:34 h
INSTRUM  spect
PROBHD   1H601
PULPROG  zgpg30
TD        65536
SOLVENT  CDCl3
NS        411
DS        2
SWH       10000.000 Hz
FIDRES   0.393176 Hz
AQ        3.2767999 sec
RG        350.43
DW        50.000 usec
DE        6.50 usec
TE        299.1 K
D1        1.00000000 sec
TDO       1
SFO1      500.3720898 MHz
NUC1      13C
P1         8.00 usec
PI         12.18000031 Hz

F2 - Processing parameters
SI         65536
SF         500.3690116 MHz
WDW        DM
SSB        0
LB         0.30 Hz
GB         0
PC         1.00
    
```

SYPR-4-294-S2

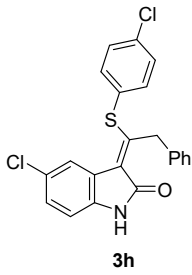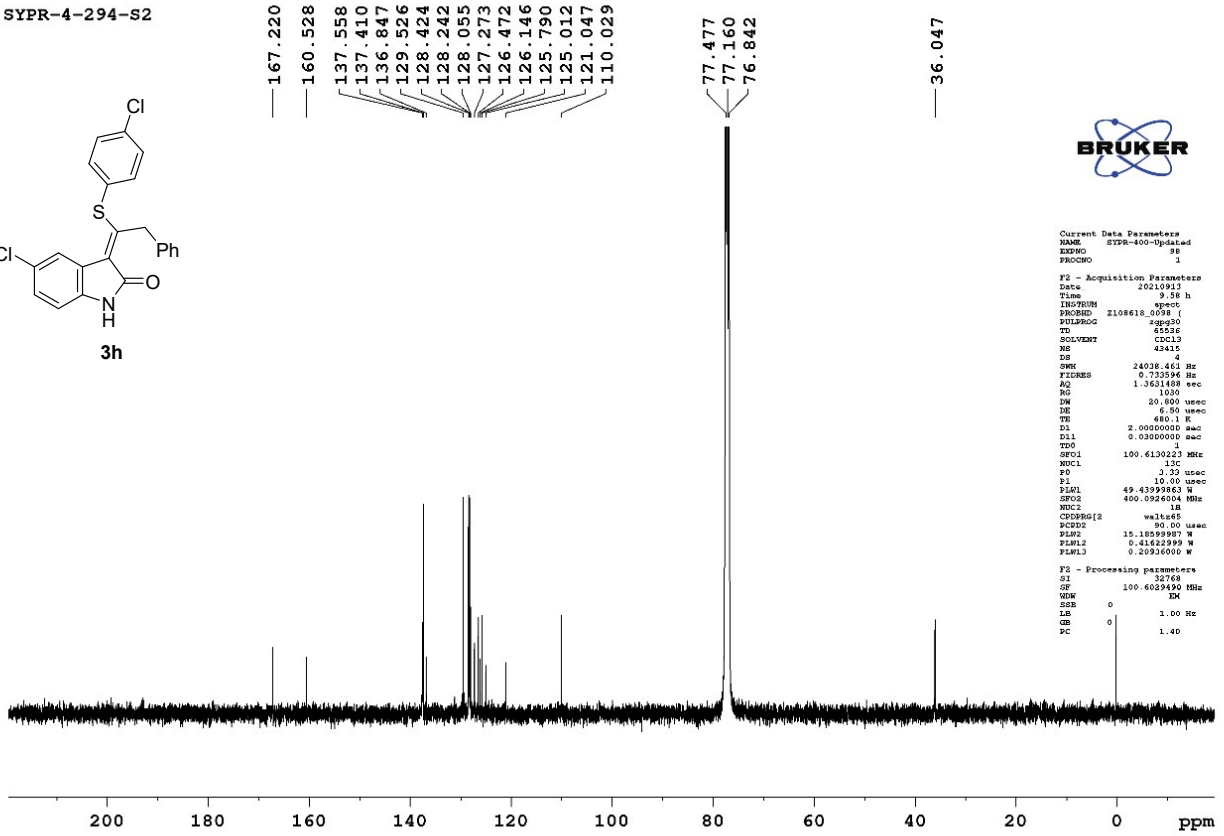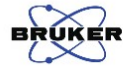

```

Current Data Parameters
NAME      SYPR-400-Updated
EXPNO    2
PROCNO   1

F2 - Acquisition Parameters
Date_    20210912
Time     9.58 h
INSTRUM  spect
PROBHD   110618.0058 (
PULPROG  zgpg30
TD        65536
SOLVENT  CDCl3
NS        43412
DS        4
SWH       24038.461 Hz
FIDRES   0.71594 Hz
AQ        1.3631488 sec
RG        1020
DM        20.800 usec
DE        8.50 usec
TE        480.1 K
D1        2.0000000 sec
d11       0.0200000 sec
TD0       1
SFO1      100.6130133 MHz
NUC1      13C
P2        3.32 usec
P3        10.00 usec
PL1L1     49.4399863 W
SFO2      400.0924804 MHz
MDC2      1B
CROSSPO2  waltz16
PCPDFT    90.00 usec
PL1R2     15.1839987 W
PL1L2     0.41622999 W
PL1L3     0.20310000 W

F2 - Processing parameters
SI        32768
SF        100.6029490 MHz
RG        0
WDW       0
SSB       0
LB        1.00 Hz
GB        0
PC        1.40
    
```

SYAK-7

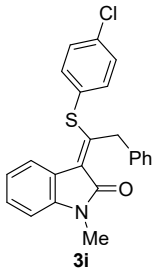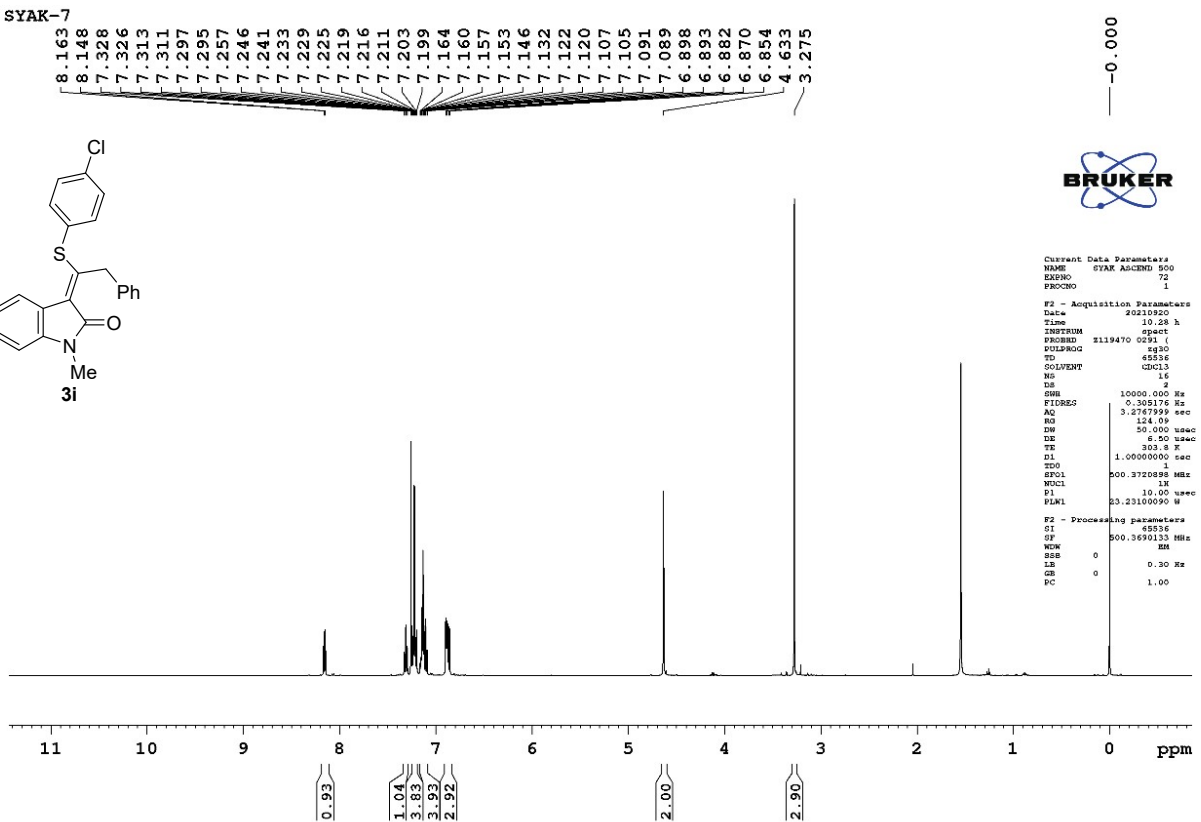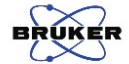

```

Current Data Parameters
NAME      SYAK-AS000
EXPNO    72
PROCNO   1

F2 - Acquisition Parameters
Date_    20210920
Time     10.28 h
INSTRUM  spect
PROBHD   1119470.0291 (
PULPROG  zgpg30
TD        65536
SOLVENT  CDCl3
NS        16
DS        2
SWH       10000.000 Hz
FIDRES   0.305176 Hz
AQ        3.2747929 sec
RG        124.00
DM        50.000 usec
DE        8.50 usec
TE        303.2 K
D1        1.0000000 sec
d11       0.0200000 sec
TD0       1
SFO1      500.3720988 MHz
NUC1      13C
P2        10.00 usec
PL1L1     23.23100090 W

F2 - Processing parameters
SI        65536
SF        500.3650133 MHz
RG        0
WDW       0
SSB       0
LB        0.30 Hz
GB        0
PC        1.00
    
```



SYAK-7

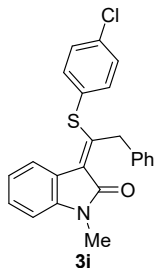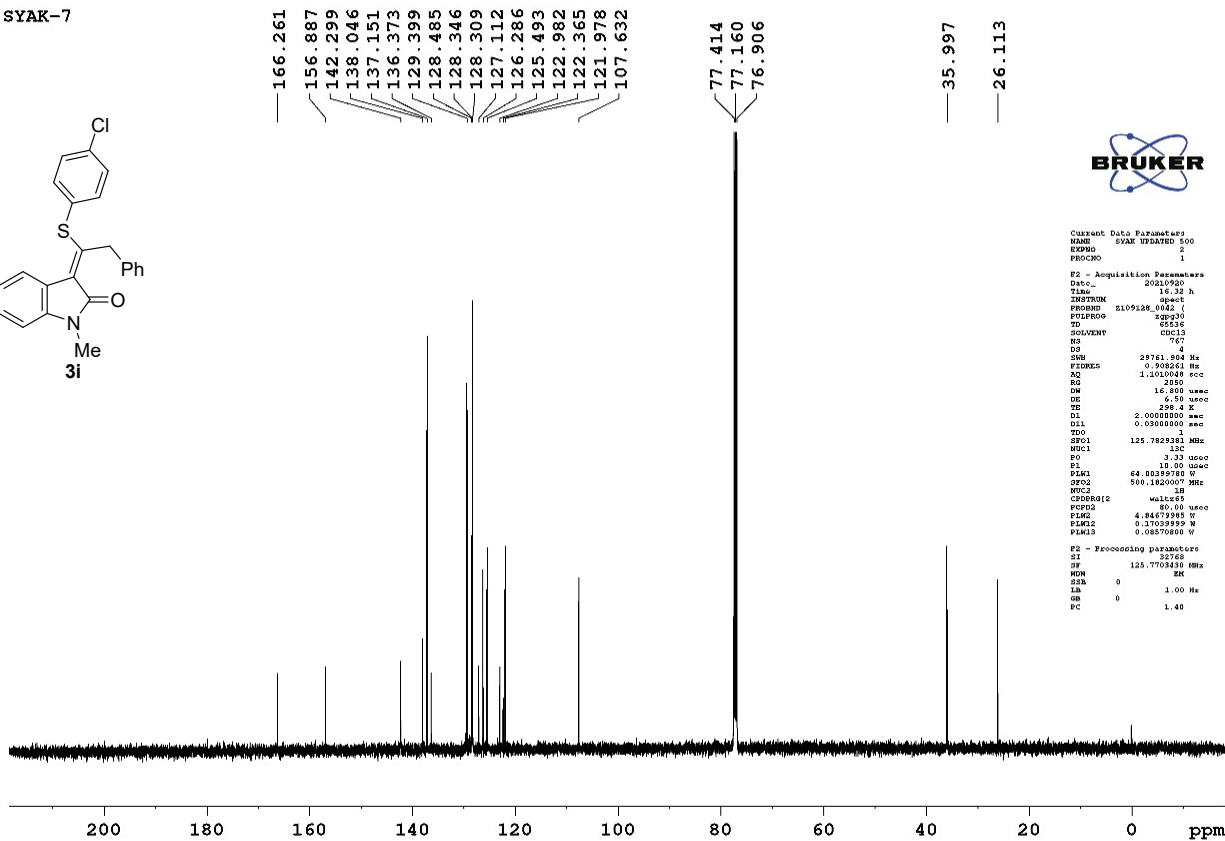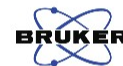

```

Current Data Parameters
NAME SYAK_UPDATED_500
EXPNO 2
PROCNO 1

F2 - Acquisition Parameters
Date_ 20210920
Time 16.32 h
INSTRUM spect
PROBHD z109128_0042 (
PULPROG zgpg30
TD 65536
SOLVENT CDCl3
NS 4
DS 2
SWH 28761.904 Hz
FIDRES 0.900000 Hz
AQ 1.1010048 sec
RG 2500
OR 16.888 usec
DE 1.50 usec
TE 298.2 K
D1 2.0000000 sec
d11 0.0300000 sec
SFO1 125.7629151 MHz
NUC1 13C
P1 3.33 usec
PL1 0.00 usec
PL12 64.80395780 W
PL13 500.1820000 MHz
SFO2 500.1313131 MHz
NUC2 1H
CROSSP2 80.00 usec
SFO3 4.84673985 W
PLM2 0.1310000 W
PLM3 0.08570888 W

F2 - Processing parameters
SI 65536
SF 125.7705430 MHz
WDW EM
SSB 0
LB 1.00 Hz
GB 0
PC 1.40
    
```

SYSC-130

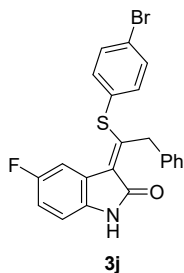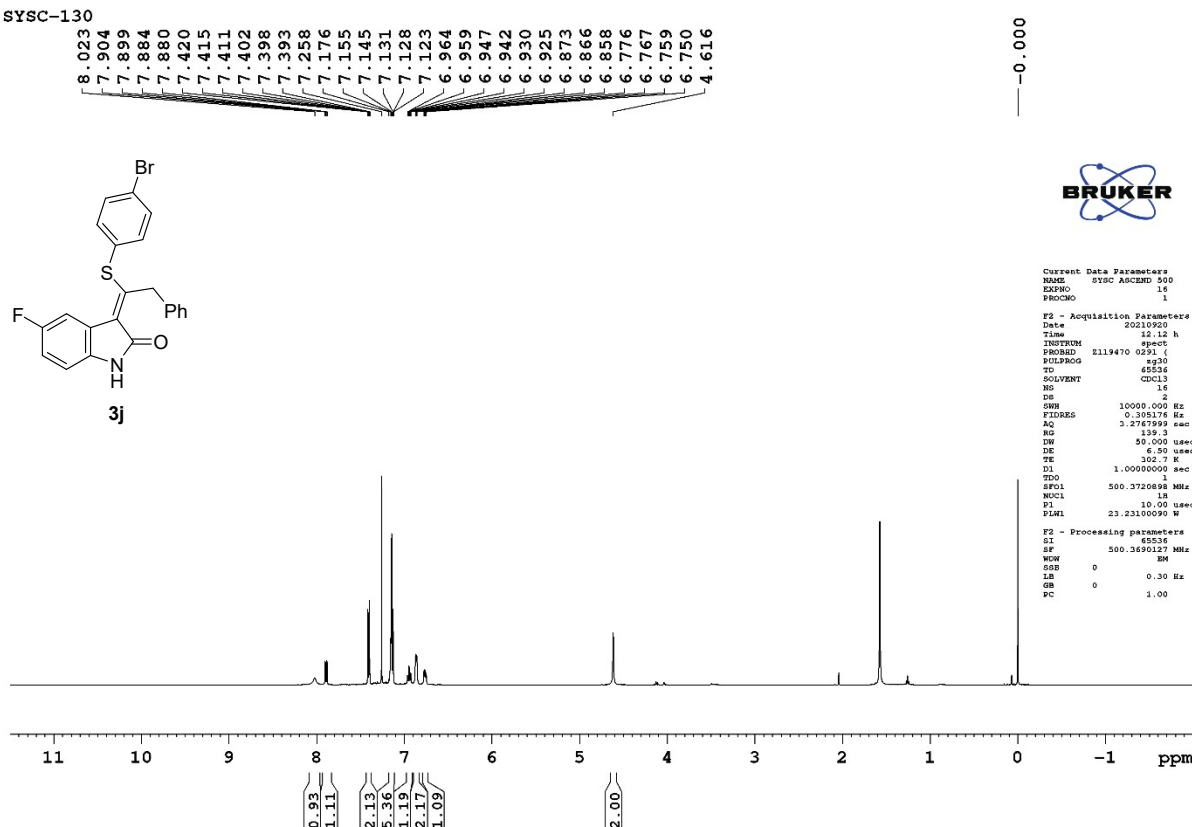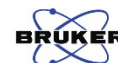

```

Current Data Parameters
NAME SYSC_ACCUM_500
EXPNO 18
PROCNO 1

F2 - Acquisition Parameters
Date_ 20210920
Time 12.12 h
INSTRUM spect
PROBHD z119470_0291 (
PULPROG zgpg30
TD 65536
SOLVENT CDCl3
NS 16
DS 2
SWH 10000.000 Hz
FIDRES 0.205176 Hz
AQ 5.2167090 sec
RG 132.3
OR 50.000 usec
DE 6.50 usec
TE 302.2 K
D1 1.0000000 sec
SFO1 500.3720898 MHz
NUC1 1H
P1 10.00 usec
PL1 23.23100090 W

F2 - Processing parameters
SI 65536
SF 500.3690127 MHz
WDW EM
SSB 0
LB 0.30 Hz
GB 0
PC 1.00
    
```

SYSC-130

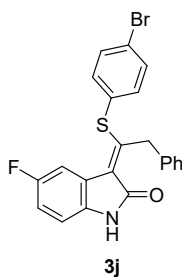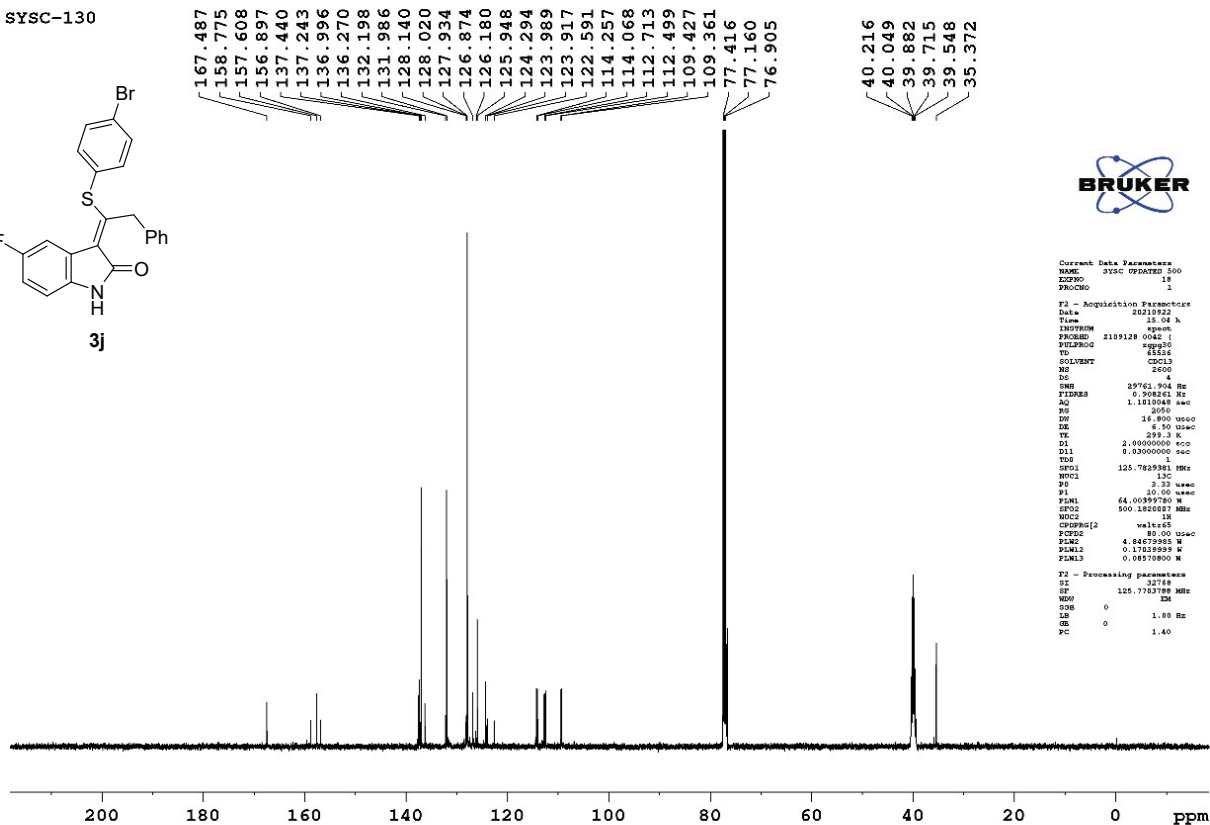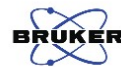

```

Current Data Parameters
NAME: SYSC UPBEND 500
EXPNO: 18
PROCNO: 1
F2 - Acquisition Parameters
Date_: 20210922
Time: 15:34 h
INSTRUM: spect
PROBHD: 1H9120 0042 1
PULPROG: zgpg30
TE: 300.2
SOLVENT: CDCl3
NS: 2000
DS: 4
SWH: 29761.904 Hz
FIDRES: 0.508261 Hz
AQ: 1.1810048 sec
RG: 2050
DQ: 18.890 usec
DE: 8.50 usec
TE: 299.2 K
D1: 2.00000000 sec
d11: 0.03000000 sec
TDS: 1
SFO1: 125.762951 MHz
NUC1: 13C
P1: 1.33 usec
PL1: 10.00 usec
P1M1: 64.0099780 MHz
SFO2: 500.135067 MHz
NUC2: 1H
CPDPRG2: waltz16
PCPD2: 89.00 usec
PLAC: 4.8467288 MHz
PLM12: 0.1783988 MHz
PLM13: 0.0870800 MHz
F2 - Processing parameters
SI: 32768
SF: 125.7703788 MHz
WDW: EM
SSB: 0
LB: 1.00 Hz
GB: 0
PC: 1.40
    
```

SYSC-ALI-141

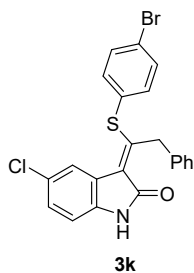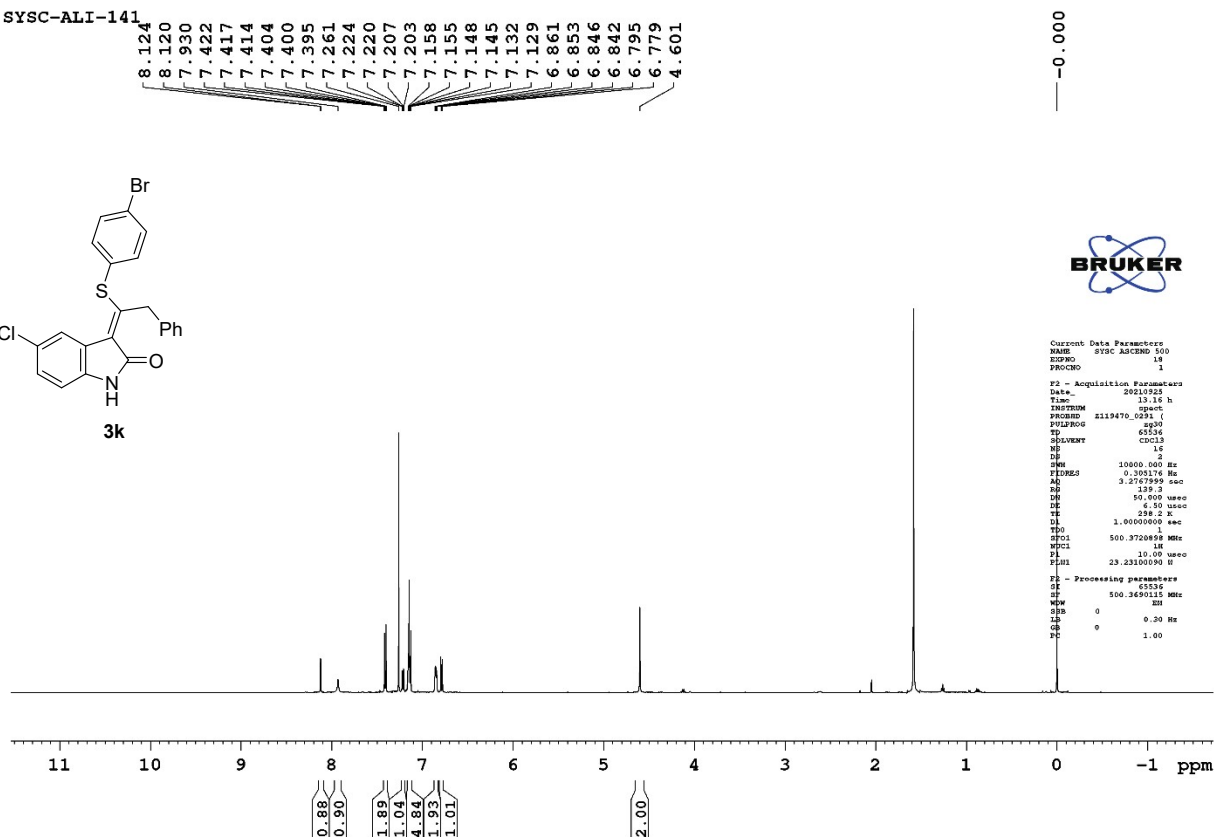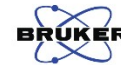

```

Current Data Parameters
NAME: SYSC ASCEND 500
EXPNO: 18
PROCNO: 1
F2 - Acquisition Parameters
Date_: 20210925
Time: 13:16 h
INSTRUM: spect
PROBHD: z119470_0291 1
PULPROG: zgpg30
TE: 300.2
SOLVENT: CDCl3
NS: 16
DS: 2
SWH: 10800.000 Hz
FIDRES: 0.200170 Hz
AQ: 3.2567899 sec
RG: 358
DQ: 50.000 usec
DE: 8.50 usec
TE: 298.2 K
TDS: 1.00000000 sec
SFO1: 500.3720678 MHz
NUC1: 1H
P1: 10.00 usec
PL1: 23.23300390 dB
F2 - Processing parameters
SI: 65536
SF: 500.3690115 MHz
WDW: EM
SSB: 0
LB: 0.00 Hz
GB: 0
PC: 1.00
    
```

SYTK-ALI-141

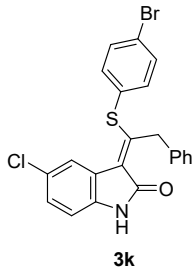

167.406  
158.851  
138.507  
137.583  
137.369  
132.284  
128.234  
128.166  
127.924  
126.957  
126.589  
126.252  
125.435  
124.765  
124.723  
121.839  
110.185

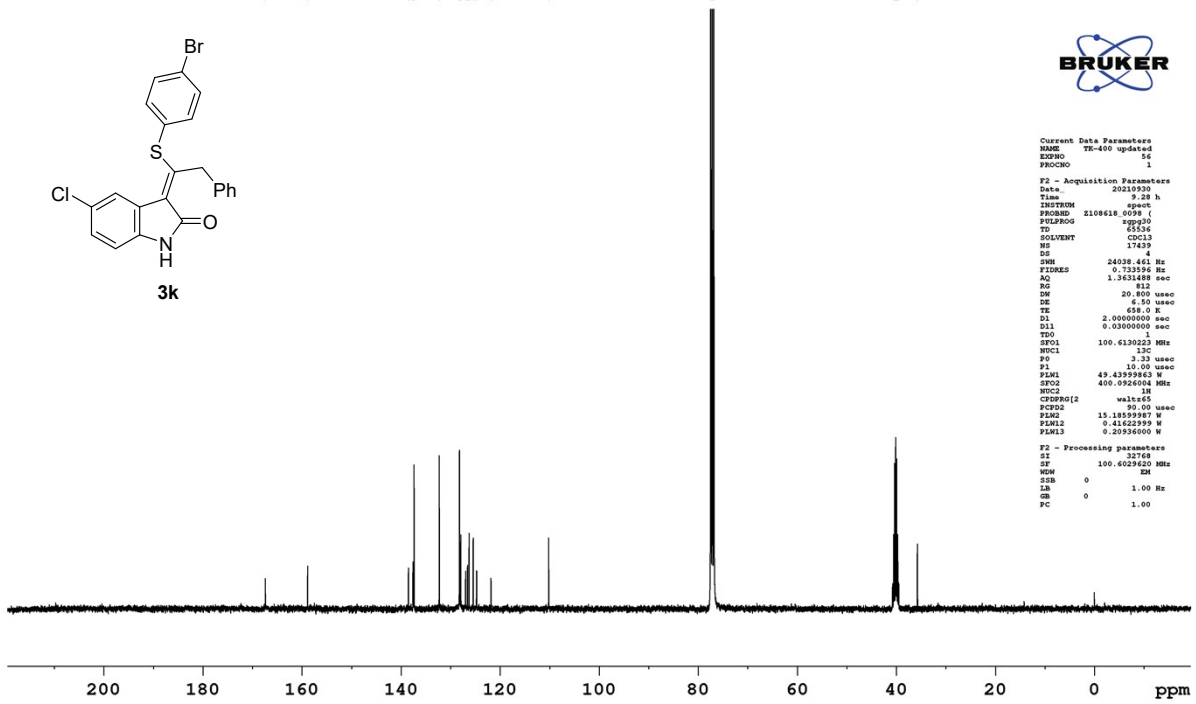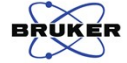

Current Data Parameters  
NAME: SYTK-ALI-141  
EXPNO: 1  
PROCNO: 1  
F2 - Acquisition Parameters  
Date\_: 20210930  
Time: 9.28 h  
INSTRUM: spect  
PROBHD: Z108618.0098 (C  
PULPROG: zgpg30  
TD: 65536  
SOLVENT: CDCl3  
NS: 1749  
DS: 4  
SWH: 24039.464 Hz  
FIDRES: 0.733594 Hz  
AQ: 1.2631488 sec  
RG: 812  
DM: 20.800 usec  
DE: 6.50 usec  
TE: 300.2 K  
D1: 2.0000000 sec  
D11: 0.0300000 sec  
TDO: 0  
SFO1: 100.6130223 MHz  
NUC1: 13C  
P1: 3.13 usec  
PL1: 10.00 usec  
PLM1: 49.4399989 W  
SFO2: 400.0924004 MHz  
NUC2: 1H  
CPDPRG2: waltz165  
PCPD2: 998.00 usec  
PLM2: 15.1859989 W  
PLM3: 0.4302099 W  
PLM13: 0.20936000 W  
F2 - Processing parameters  
SI: 32768  
SF: 100.6029620 MHz  
WDW: EM  
SSB: 0 1.00 Hz  
LB: 0  
GB: 0 1.00  
PC: 1.00

SYPR-4-309 N

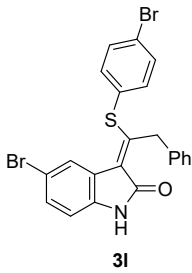

8.259  
7.814  
7.417  
7.401  
7.374  
7.370  
7.357  
7.354  
7.261  
7.156  
7.154  
7.144  
7.128  
6.856  
6.850  
6.842  
6.760  
6.743

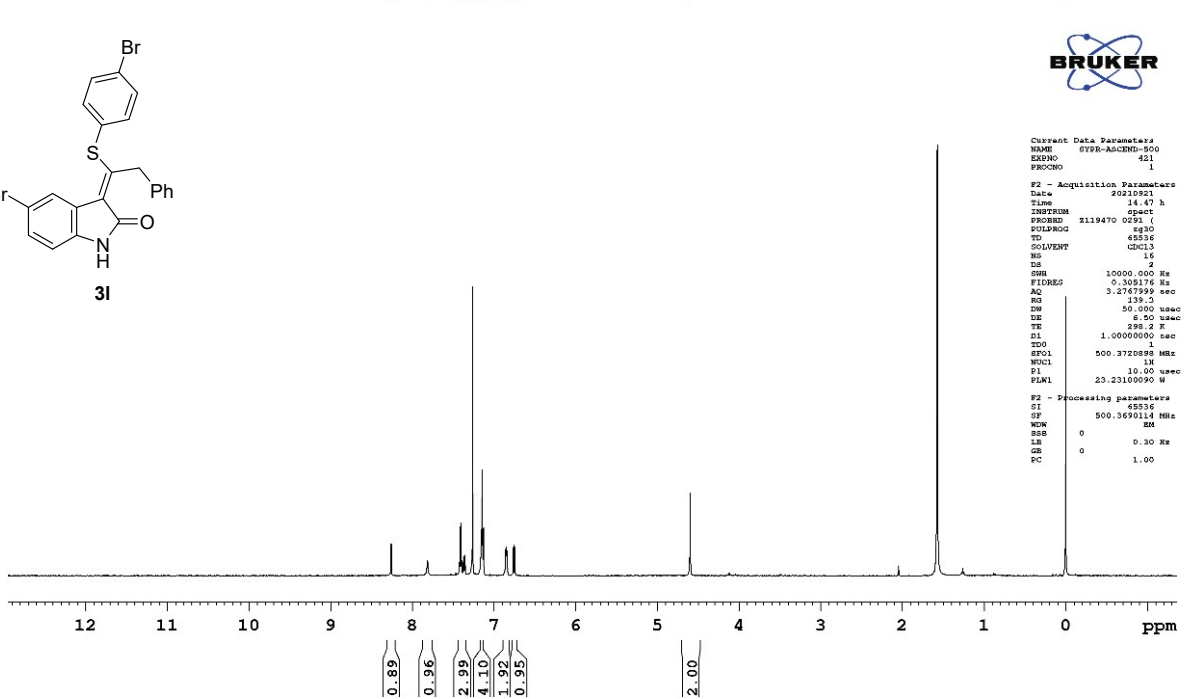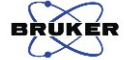

Current Data Parameters  
NAME: SYPR-4-309 N  
EXPNO: 421  
PROCNO: 1  
F2 - Acquisition Parameters  
Date\_: 20210921  
Time: 14.47 h  
INSTRUM: spect  
PROBHD: Z119470.0299 (C  
PULPROG: zgpg30  
TD: 65536  
SOLVENT: CDCl3  
NS: 15  
DS: 2  
SWH: 10000.000 Hz  
FIDRES: 0.308176 Hz  
AQ: 3.2707594 sec  
RG: 399.5  
DM: 50.000 usec  
DE: 6.50 usec  
TE: 300.2 K  
D1: 1.0000000 sec  
TDO: 0  
SFO1: 500.3720898 MHz  
NUC1: 13C  
P1: 10.00 usec  
PLM1: 23.23100090 W  
F2 - Processing parameters  
SI: 65536  
SF: 500.3690114 MHz  
WDW: EM  
SSB: 0 0.30 Hz  
LB: 0  
GB: 0 1.00  
PC: 1.00

SYPR- 4-309 N

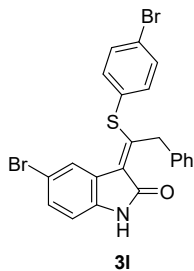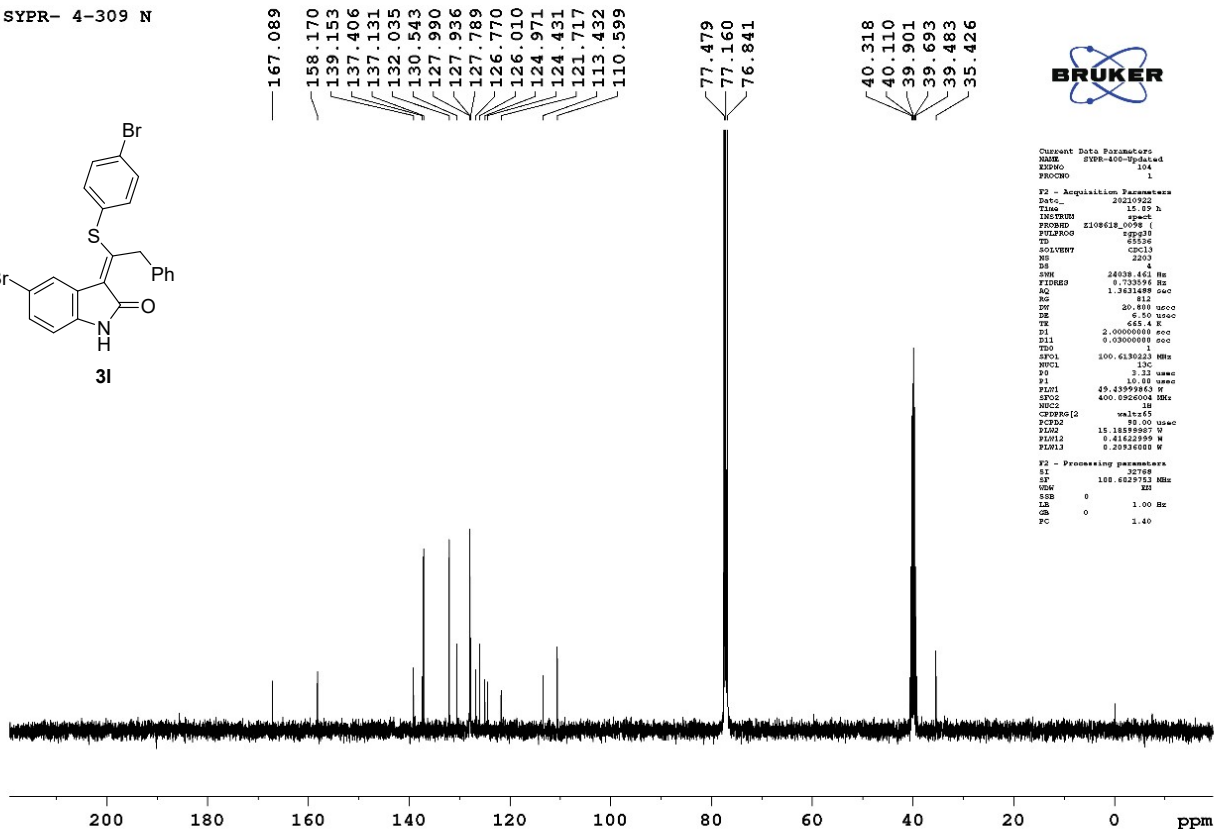

SYPR-4-316

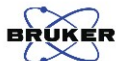

```

Current Data Parameters
NAME  SYPR-400-Updated
EXPNO  1
PROCNO  1

F2 - Acquisition Parameters
Date_  20210922
Time  16:19:14
INSTRUM  spect
PROBHD  zgpg30 (
PULPROG  zgpg30
TD  65536
SOLVENT  cdcl3
NS  2033
DS  4
SWH  10000.000 Hz
FIDRES  0.305176 Hz
AQ  3.2767999 sec
RG  134.09
DE  50.090 usec
TE  6.50 usec
T1  298.2 K
D1  1.00000000 sec
T20  1
SFO1  500.3720998 MHz
NUC1  13C
P1  10.00 usec
PL1  23.23100000 W

F2 - Processing parameters
SI  65536
SF  500.3690124 MHz
WDW  0
SSB  0
LB  0.30 Hz
GB  0
PC  1.00
    
```

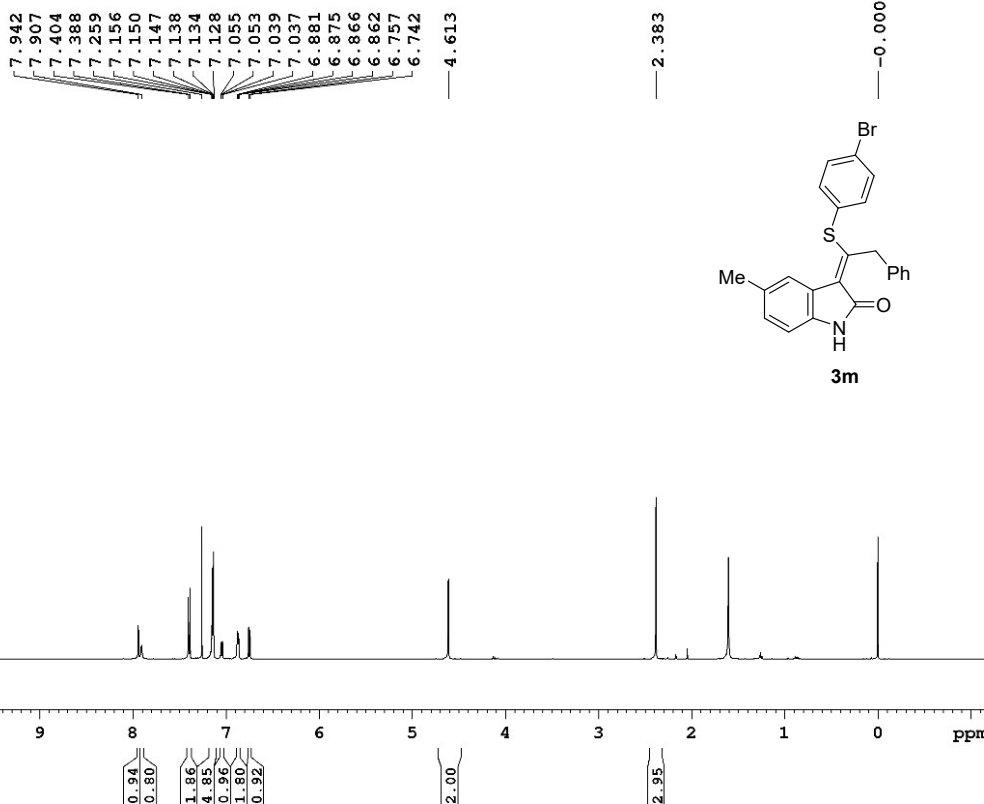

SYPR-4-316

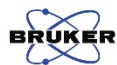

```

Current Data Parameters
NAME: SYPR-ASCPD-316
EXPNO: 422
PROCNO: 1
F2 - Acquisition Parameters
Date_ 20121212
Time: 12:12:48
INSTRUM: spect
PROBHD: 513470-QNP-1
PULPROG: zgpg30
PC: zgpg30
SOLVENT: CDCl3
NS: 2048
DS: 4
SWH: 24961.916 Hz
FIDRES: 0.00048 Hz
AQ: 1.1218048 sec
RG: 312.88
AQ: 16.800 usec
DE: 6.00 usec
TE: 299.2 K
NUC1: 13C
NUC2: 13C
NUC3: 13C
NUC4: 13C
P1: 12.00 usec
P2: 110.0000016 M
P3: 500.1300010 MHz
NUC1P2: 13C
NUC2P2: 13C
NUC3P2: 13C
NUC4P2: 13C
PCPDSP12: white16
PCPDSP13: white16
P2M2: 23.2500000 M
P2M3: 0.1620000 M
P2M12: 0.1620000 M
F2 - Processing parameters
SI: 32768
SF: 125.017950 MHz
WDW: EM
SSB: 0
LB: 1.00 Hz
GB: 0
PC: 1.00
  
```

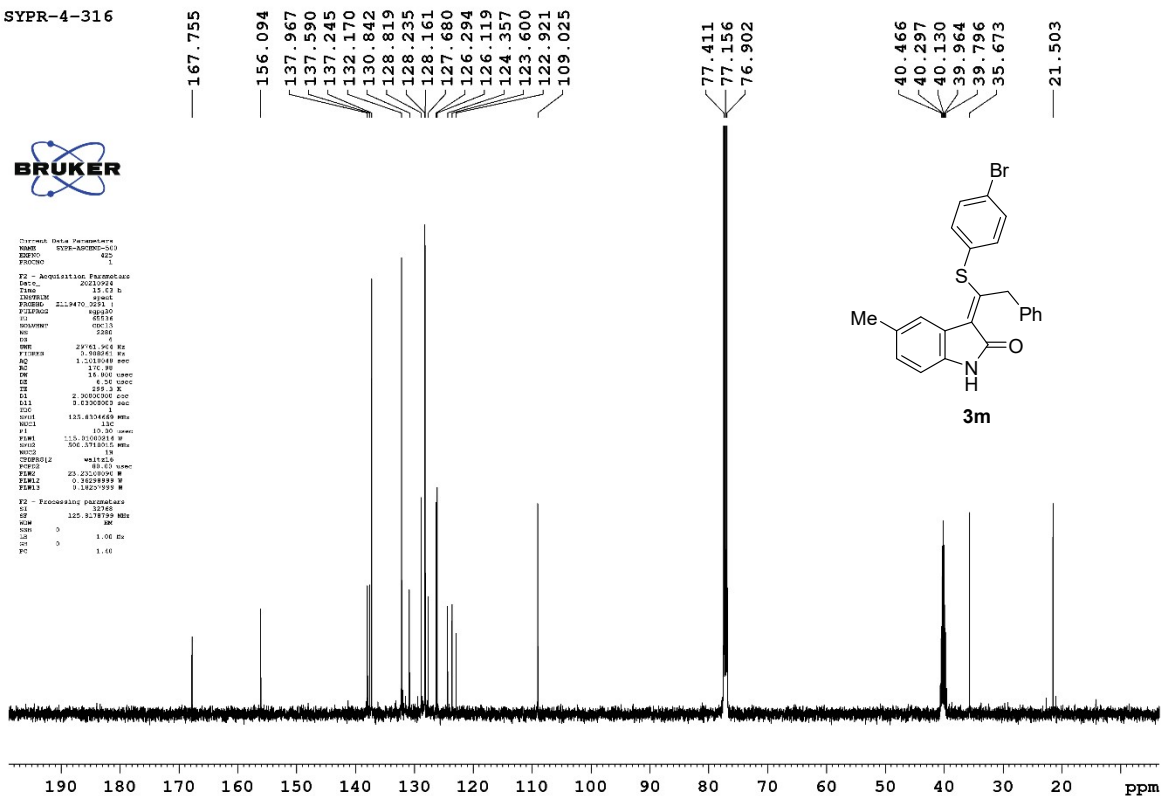

SYDA- 3n

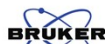

```

Current Data Parameters
NAME: SYDA-3n-111
EXPNO: 111
PROCNO: 1
F2 - Acquisition Parameters
Date_ 20121020
Time: 10:23:14
INSTRUM: spect
PROBHD: 513470-QNP-1
PULPROG: zgpg30
PC: zgpg30
SOLVENT: CDCl3
NS: 2048
DS: 4
SWH: 10000.000 MHz
FIDRES: 0.0001516 MHz
AQ: 3.2707959 sec
RG: 640
AQ: 50.000 usec
DE: 13.04 usec
TE: 299.2 K
NUC1: 13C
NUC2: 13C
NUC3: 13C
NUC4: 13C
P1: 12.00 usec
P2: 500.1300010 MHz
P3: 500.1300010 MHz
P2M2: 23.2500000 M
P2M3: 0.1620000 M
P2M12: 0.1620000 M
F2 - Processing parameters
SI: 32768
SF: 500.1300010 MHz
WDW: EM
SSB: 0
LB: 0.30 Hz
GB: 0
PC: 1.00
  
```

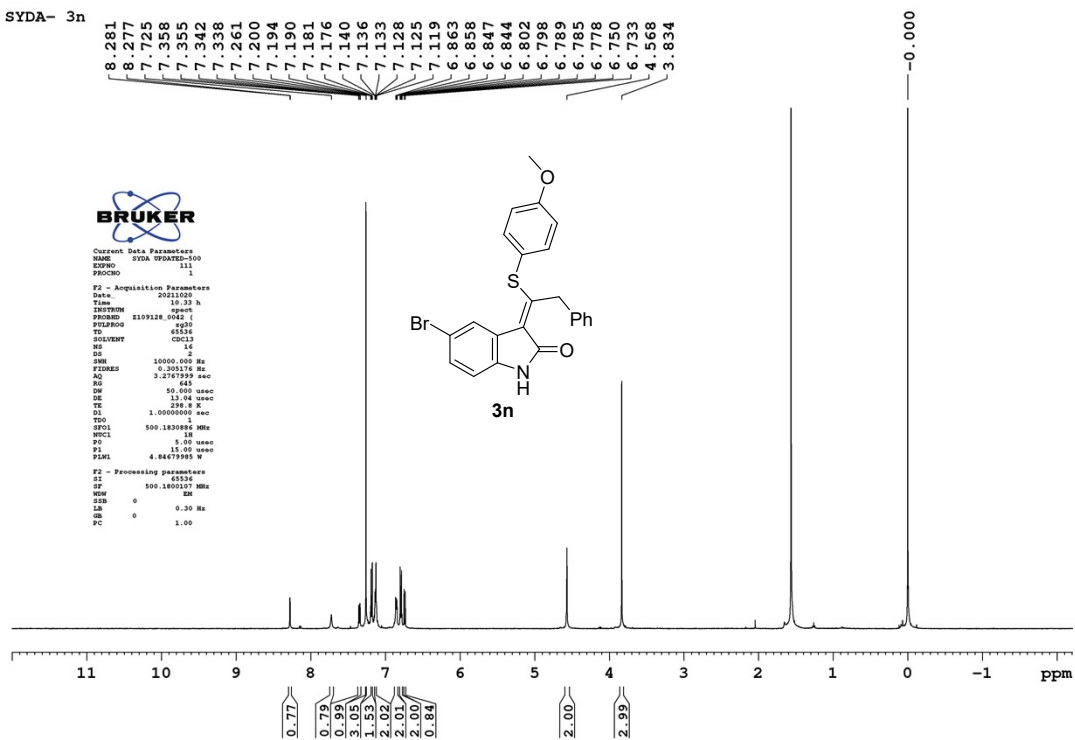

SYDA -3n

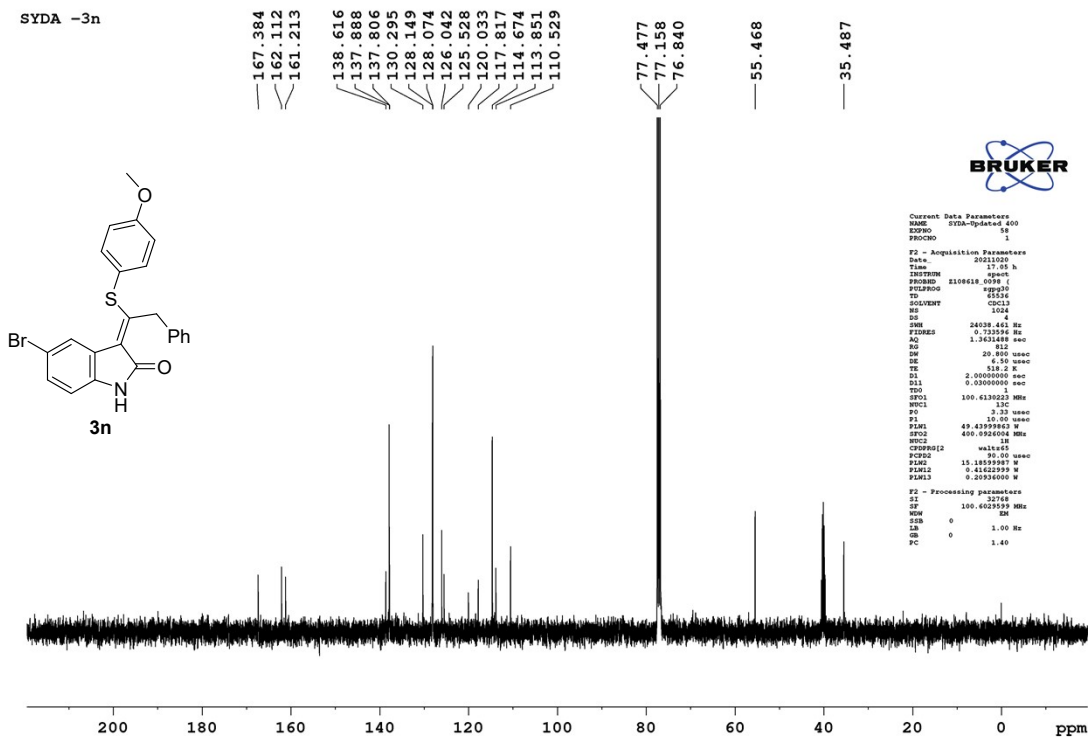

SYSC-137

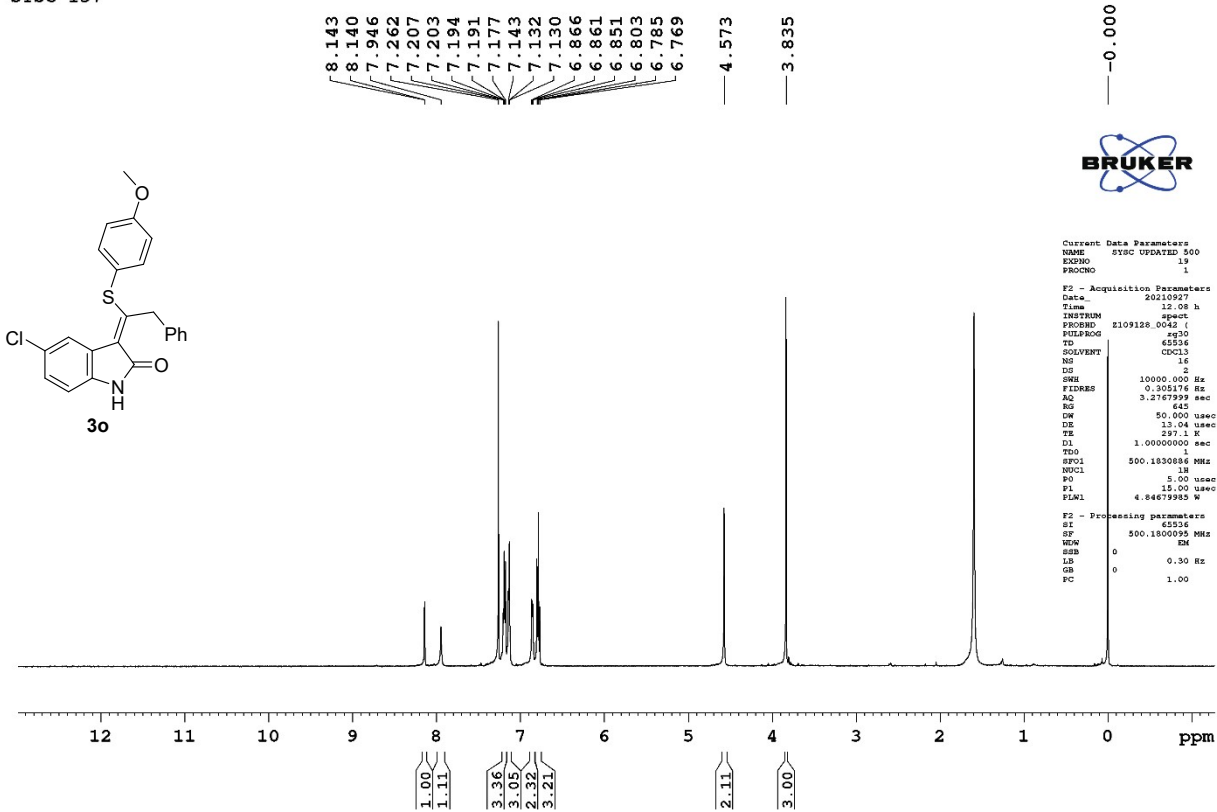

SYSC-137

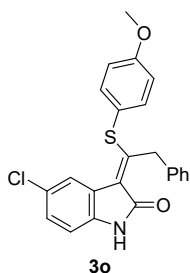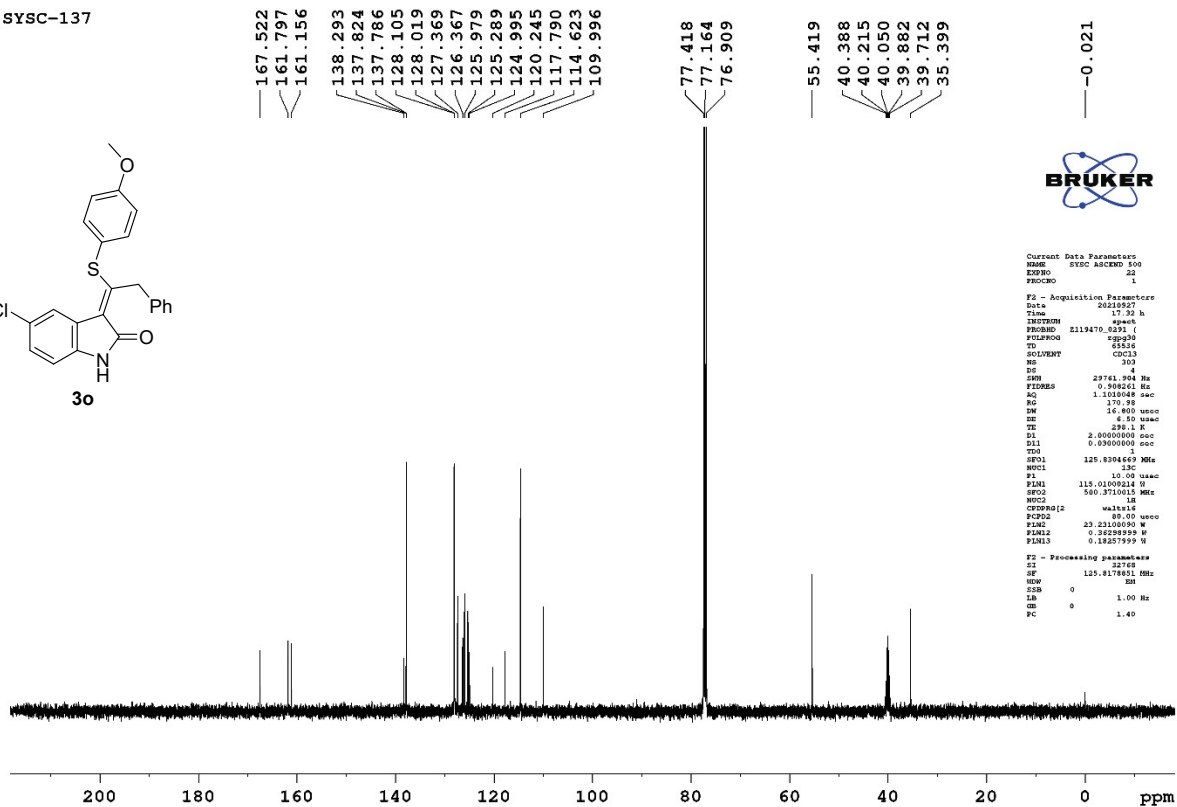

SYPR-ALI-317

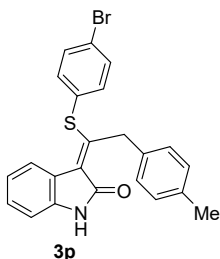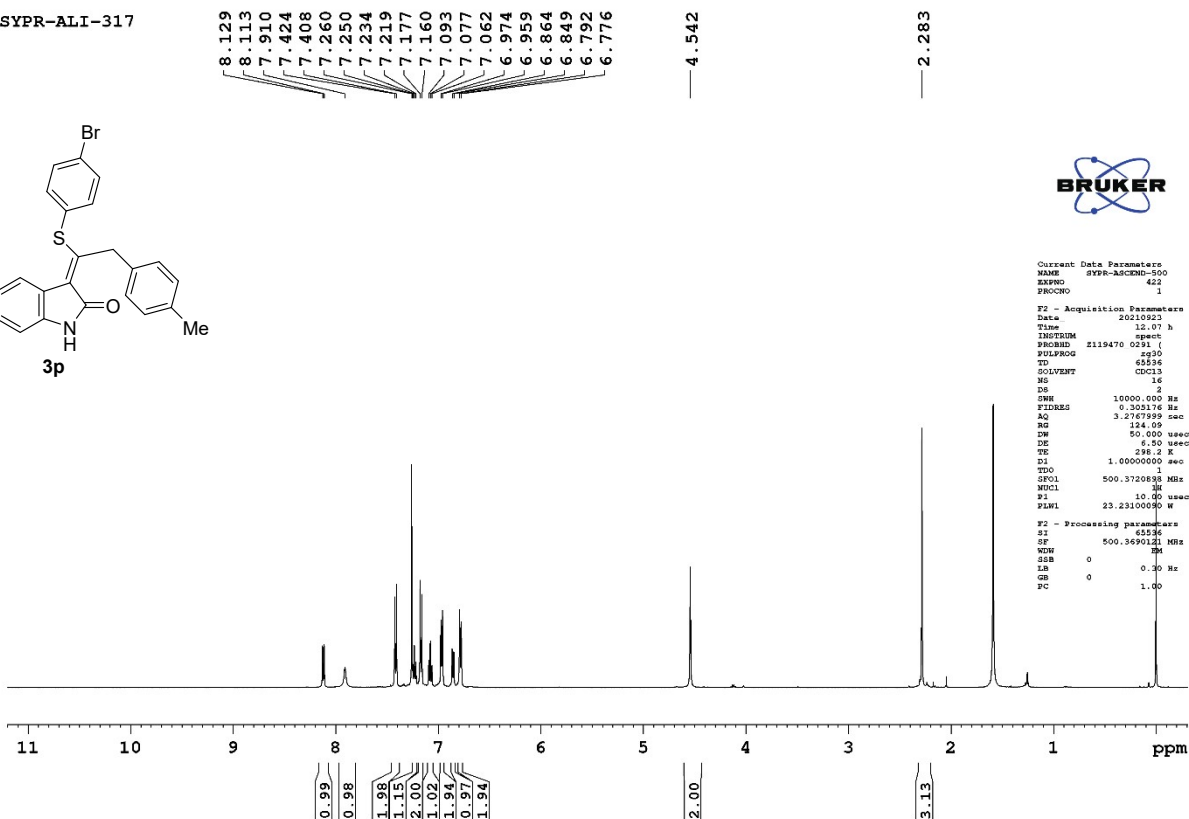

SYPR-ALI-317

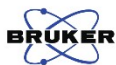

```

Current Data Parameters
NAME: SYPR-ACBND-317
EXPNO: 1
PROCNO: 1
F2 - Acquisition Parameters
Date_   : 20120202
Time    : 10:21 h
INSTRUM : spect
PROBHD  : 5mm QNP 1H/1
PULPROG : zgpg30
TD      : 65536
SOLVENT : CDCl3
NS      : 128
DS      : 4
SWH     : 20414.614 Hz
FIDRES  : 0.000000 Hz
AQ      : 1.012088 sec
RG      : 327.50
DE      : 18.00 umax
TE      : 300.2 K
D1      : 1.0000000 sec
d11     : 0.0000000 sec
DELTA   : 2.0000000 sec
SFO1    : 500.1370993 MHz
NUC1    : 1H
SFO2    : 125.7611550 MHz
NUC2    : 13C
AQ2     : 1.012088 sec
RG2     : 327.50
DE2     : 18.00 umax
TE2     : 300.2 K
D12     : 1.0000000 sec
d121    : 0.0000000 sec
DELTA2  : 2.0000000 sec
SFO3    : 75.2611550 MHz
NUC3    : 13C
AQ3     : 1.012088 sec
RG3     : 327.50
DE3     : 18.00 umax
TE3     : 300.2 K
D13     : 1.0000000 sec
d131    : 0.0000000 sec
DELTA3  : 2.0000000 sec
SFO4    : 150.5223100 MHz
NUC4    : 13C
AQ4     : 1.012088 sec
RG4     : 327.50
DE4     : 18.00 umax
TE4     : 300.2 K
D14     : 1.0000000 sec
d141    : 0.0000000 sec
DELTA4  : 2.0000000 sec
F2 - Processing parameters
SI      : 65536
SF      : 500.1370993 MHz
WDW     : EM
SSB     : 0
LB      : 0.30 Hz
GB      : 0
PC      : 1.00
  
```

- 167.708
- 158.071
- 137.369
- 135.896
- 134.814
- 132.400
- 129.052
- 128.477
- 128.242
- 127.709
- 125.795
- 124.640
- 121.975
- 109.303

- 77.410
- 77.156
- 76.902

- 35.569

- 21.186

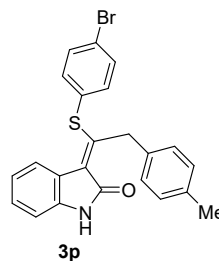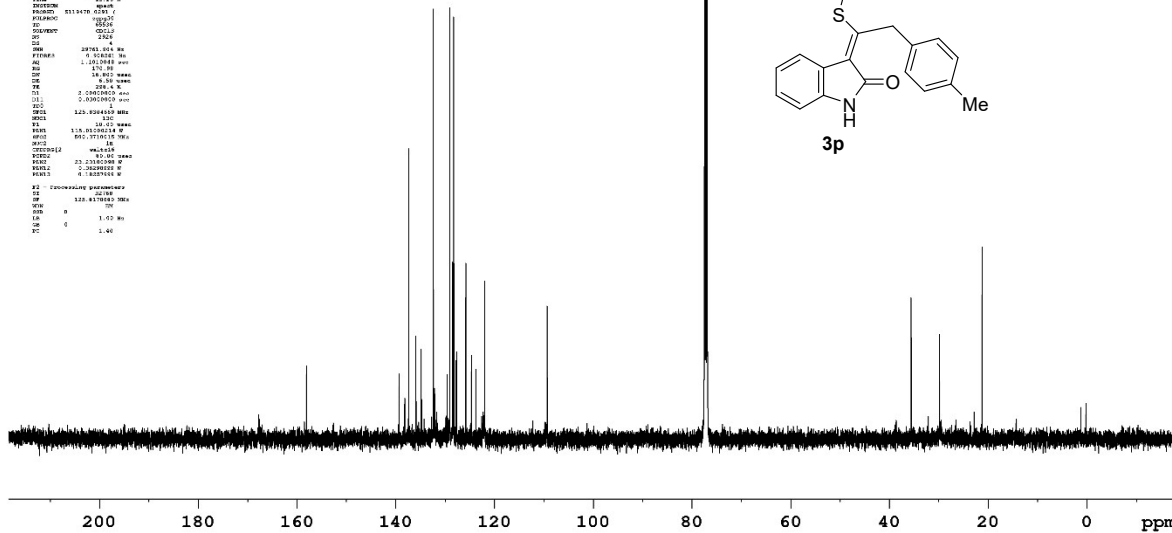

SYTK-SPh-2

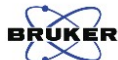

```

Current Data Parameters
NAME: SYTK-ACBND-184
EXPNO: 1
PROCNO: 1
F2 - Acquisition Parameters
Date_   : 20120314
Time    : 10:30 h
INSTRUM : spect
PROBHD  : 5mm QNP 1H/1
PULPROG : zgpg30
TD      : 65536
SOLVENT : CDCl3
NS      : 128
DS      : 4
SWH     : 10000.000 Hz
FIDRES  : 0.005176 Hz
AQ      : 3.2767999 sec
RG      : 192.83
DE      : 50.000 umax
TE      : 300.2 K
D1      : 1.0000000 sec
d11     : 0.0000000 sec
DELTA   : 2.0000000 sec
SFO1    : 500.1370993 MHz
NUC1    : 1H
SFO2    : 125.7611550 MHz
NUC2    : 13C
AQ2     : 1.012088 sec
RG2     : 327.50
DE2     : 18.00 umax
TE2     : 300.2 K
D12     : 1.0000000 sec
d121    : 0.0000000 sec
DELTA2  : 2.0000000 sec
SFO3    : 75.2611550 MHz
NUC3    : 13C
AQ3     : 1.012088 sec
RG3     : 327.50
DE3     : 18.00 umax
TE3     : 300.2 K
D13     : 1.0000000 sec
d131    : 0.0000000 sec
DELTA3  : 2.0000000 sec
SFO4    : 150.5223100 MHz
NUC4    : 13C
AQ4     : 1.012088 sec
RG4     : 327.50
DE4     : 18.00 umax
TE4     : 300.2 K
D14     : 1.0000000 sec
d141    : 0.0000000 sec
DELTA4  : 2.0000000 sec
F2 - Processing parameters
SI      : 65536
SF      : 500.1370993 MHz
WDW     : EM
SSB     : 0
LB      : 0.30 Hz
GB      : 0
PC      : 1.00
  
```

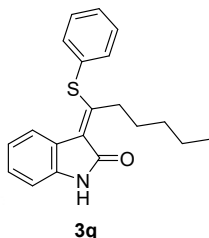

- 8.121
- 8.106
- 7.823
- 7.612
- 7.610
- 7.606
- 7.601
- 7.596
- 7.593
- 7.477
- 7.466
- 7.463
- 7.460
- 7.452
- 7.449
- 7.441
- 7.437
- 7.424
- 7.260
- 7.215
- 7.213
- 7.200
- 7.197
- 7.184
- 7.182
- 7.082
- 7.080
- 7.067
- 7.065
- 7.052
- 7.049
- 6.851
- 6.850
- 6.835
- 6.835
- 3.030
- 3.019
- 3.014
- 3.008
- 2.998
- 1.607
- 1.475
- 1.465
- 1.458
- 1.453
- 1.444
- 1.131
- 1.126
- 1.122
- 1.118
- 1.115
- 1.108
- 1.104
- 1.101
- 0.787
- 0.773
- 0.759
- 0.000

- 0.94
- 0.91
- 1.94
- 3.08
- 1.02
- 1.06
- 0.95

- 2.00

- 2.11
- 4.11
- 3.06

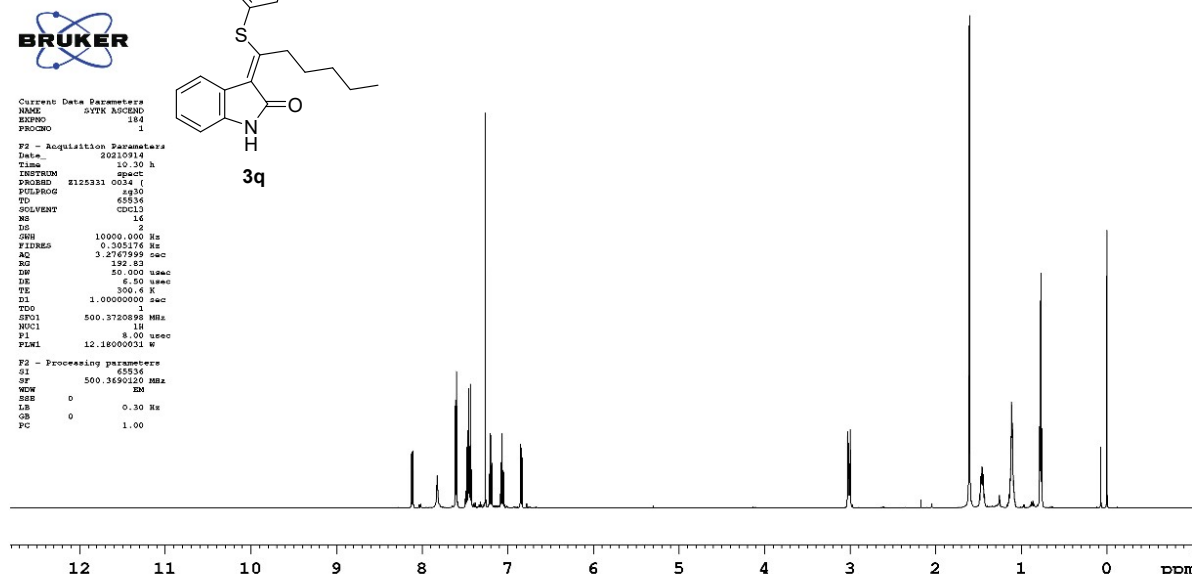



SYTK-SPh-2

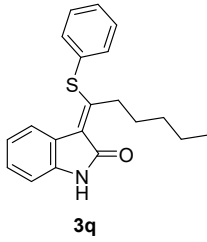

167.868  
167.781  
163.116

139.298  
139.242  
136.060  
129.990  
129.504  
129.382  
129.086  
127.711  
125.343  
124.189  
121.676  
119.808  
109.094  
109.069

77.414  
77.161  
76.907

31.723  
31.119  
29.879  
22.226  
14.033

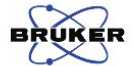

```

Current Data Parameters
NAME      SYTK-SPh-2
EXPNO    186
PROCNO   1

F2 - Acquisition Parameters
Date_    20210915
Time     17:31 A
INSTRUM  spect
PROBHD   1H1470-QNP1 (
PULPROG  zgpg30
TD        65536
SOLVENT  CDCl3
NS        377
DS        4
SWH       20761.904 Hz
FIDRES   0.998261 Hz
AQ        1.1810048 sec
RG         270.98
DF         14.800 usec
DE         6.50 usec
TE        301.2 K
D1        2.0000000 sec
D11       1.0300000 sec
SFO1      125.8304669 MHz
NUC1       13C
P1         130.00 usec
PL1        115.0190214 W
PCPD2     20.00 usec
NUC2       1H
SFO2      500.1360514 MHz
PCPD2     18.00 usec
PCPD2     mult16
PLM1      23.2310099 W
PLM2      0.3629899 W
PLM3      0.1825799 W

F2 - Processing parameters
SI        32768
SF        125.8178664 MHz
WDW       EM
SSB       0
LB        1.00 Hz
GB        0
PC        1.40
  
```

200 190 180 170 160 150 140 130 120 110 100 90 80 70 60 50 40 30 20 10 0 ppm

SYTK-SPh-2

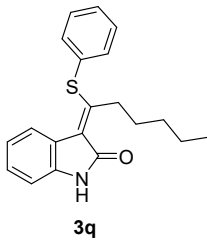

136.062  
129.992  
129.492  
127.686  
125.309  
121.656

109.082

31.704  
31.082  
29.863  
22.212  
14.033

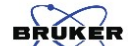

```

Current Data Parameters
NAME      SYTK-SPh-2
EXPNO    185
PROCNO   1

F2 - Acquisition Parameters
Date_    20210915
Time     17:10 h
INSTRUM  spect
PROBHD   1H1470-QNP1 (
PULPROG  zgpg30
TD        65536
SOLVENT  CDCl3
NS        125
DS        4
SWH       31250.000 Hz
FIDRES   0.933076 Hz
AQ        1.0485760 sec
RG         250.83
DF         14.000 usec
DE         6.50 usec
TE        300.5 K
CHFTZ    145.0000000
D1        2.0000000 sec
D11       0.00348828 sec
D12       0.00002000 sec
SFO1      125.8279504 MHz
NUC1       13C
P1         19.00 usec
PL1        115.01000214 W
PCPD2     20.00 usec
SFO2      500.1360514 MHz
PCPD2     18.00 usec
PCPD2     mult16
PLM1      23.2310099 W
PLM2      0.3629899 W
PLM3      0.1825799 W

F2 - Processing parameters
SI        32768
SF        125.8178664 MHz
WDW       EM
SSB       0
LB        1.00 Hz
GB        0
PC        1.40
  
```

200 180 160 140 120 100 80 60 40 20 0 -20 ppm

SYSL-328-B

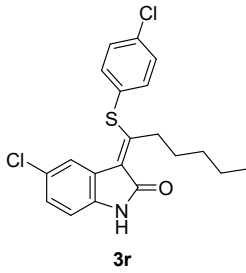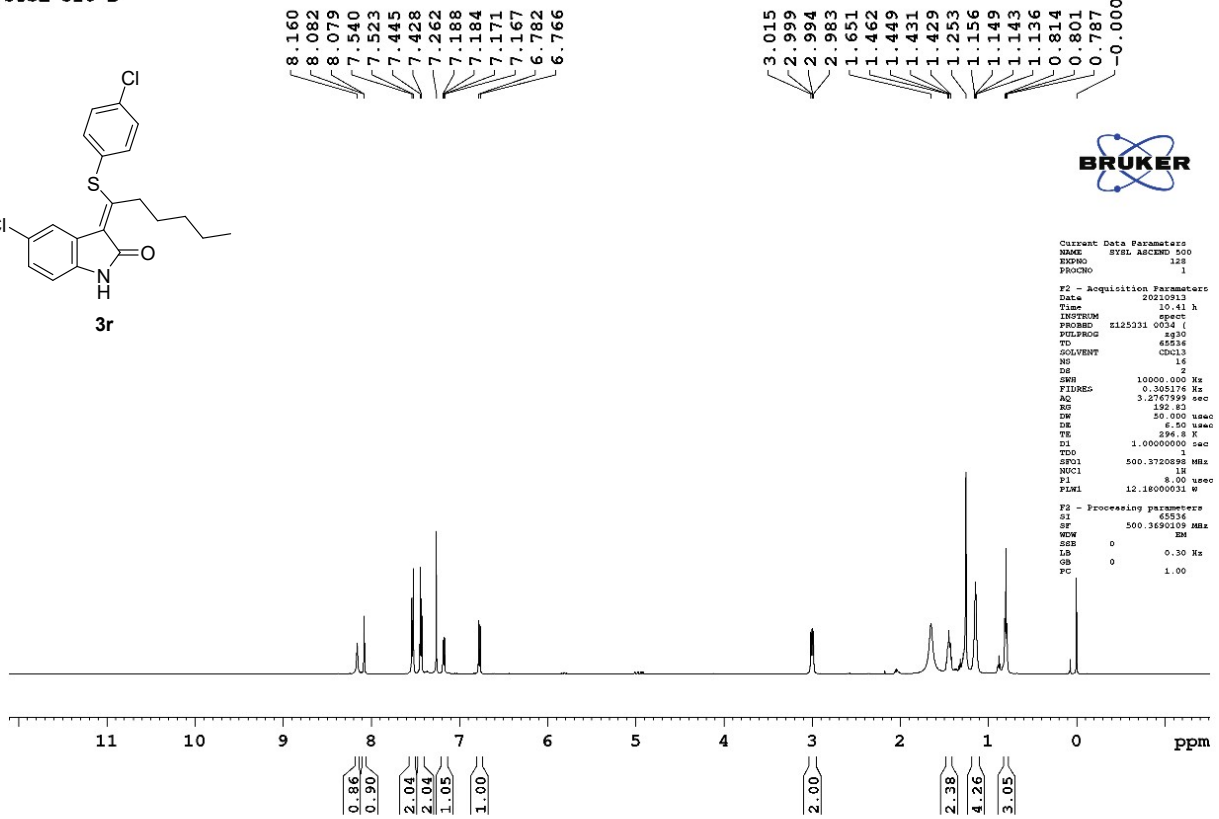

Current Data Parameters  
 NAME SYSL-328-B-500  
 EXPNO 128  
 PROCNO 1

F2 - Acquisition Parameters  
 Date\_ 20210913  
 Time 10:41 h  
 INSTRUM spect  
 PROBRD z12531 0034 ( 420  
 PULPROG zgpg30  
 TO 65536  
 SOLVENT CDCl3  
 NS 16  
 DS 2  
 SSB 10000.000 Ks  
 FIDRES 0.305176 Hz  
 AQ 3.2767599 sec  
 RG 192.83  
 DW 20.000 usec  
 DE 6.50 usec  
 TE 296.2 K  
 D1 1.00000000 sec  
 TDO 1  
 SFO1 500.3720688 MHz  
 NUC1 1H  
 P1 8.00 usec  
 PLM1 12.18000031 W

F2 - Processing parameters  
 SI 65536  
 SF 500.3690109 MHz  
 WDW EM  
 SSB 0  
 LB 0.30 Hz  
 GB 0  
 PC 1.00

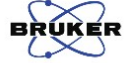

SYSL- 328-B-overnight

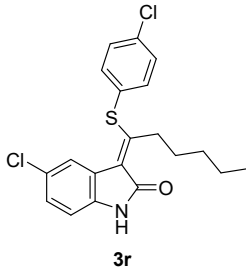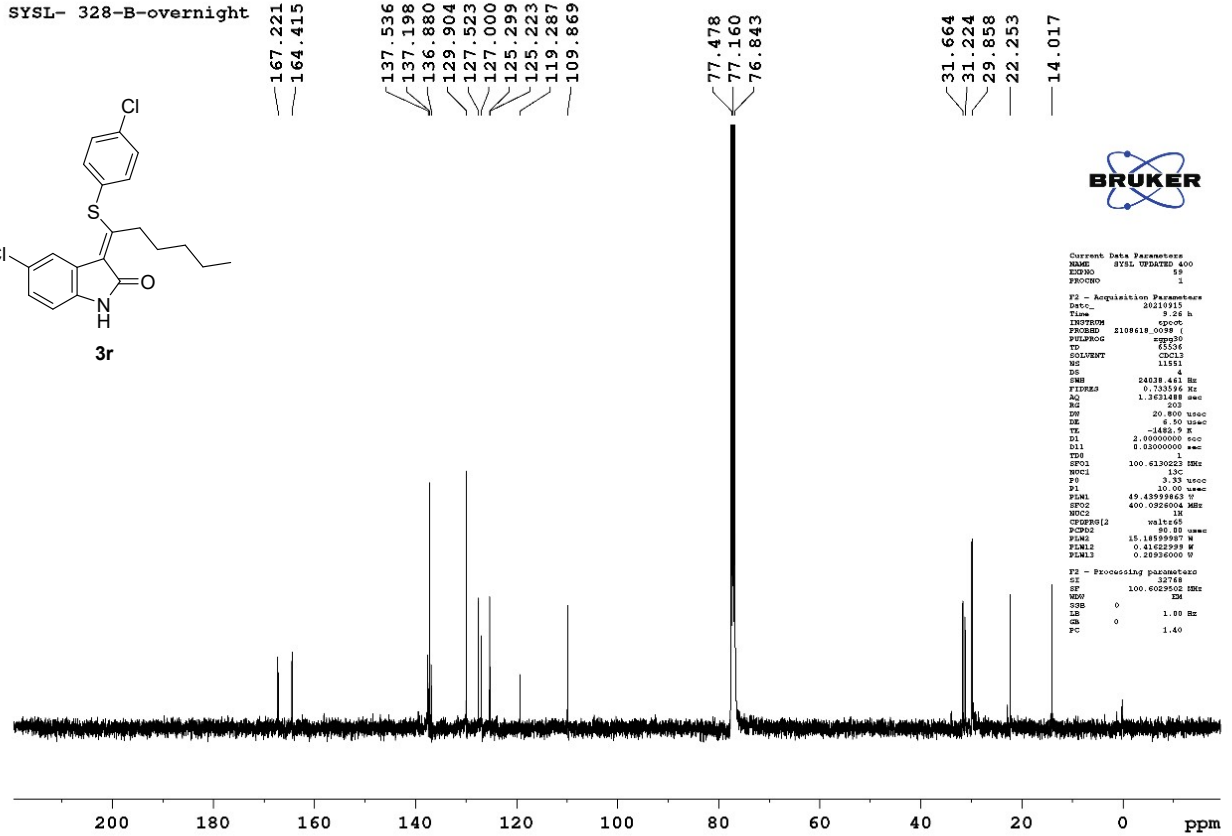

Current Data Parameters  
 NAME SYSL-328-B-400  
 EXPNO 19  
 PROCNO 1

F2 - Acquisition Parameters  
 Date\_ 20210915  
 Time 9:26 h  
 INSTRUM spect  
 PROBRD z12531 0034 ( 420  
 PULPROG zgpg30  
 TO 65536  
 SOLVENT CDCl3  
 NS 16  
 DS 2  
 SSB 24838.441 Hz  
 FIDRES 0.233556 Hz  
 AQ 1.361448 sec  
 RG 203  
 DW 20.000 usec  
 DE 6.50 usec  
 TE -182.9 K  
 D1 2.00000000 sec  
 D11 8.00000000 sec  
 TDO 1  
 SFO1 100.6130263 MHz  
 NUC1 13C  
 P1 3.15 usec  
 P1 10.00 usec  
 PLM1 49.4259980 W  
 SFO2 400.0926004 MHz  
 NUC2 1H  
 CPOFFS(2) wait63  
 PPRG 90.00 usec  
 PLM2 15.1859987 W  
 PLM3 0.4162299 W  
 PLM4 0.2592600 W

F2 - Processing parameters  
 SI 23748  
 SF 100.6095002 MHz  
 WDW EM  
 SSB 0  
 LB 1.00 Hz  
 GB 0  
 PC 1.40

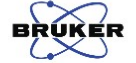

SYDA-209-1

8.565  
7.856  
7.851  
7.836  
7.832  
7.543  
7.538  
7.534  
7.525  
7.521  
7.516  
7.444  
7.439  
7.435  
7.426  
7.422  
7.260  
6.928  
6.923  
6.910  
6.905  
6.893  
6.888  
6.777  
6.768  
6.760  
6.751  
3.031  
3.015  
2.999  
1.765  
1.466  
1.451  
1.451  
1.437  
1.249  
1.237  
1.223  
1.209  
1.209  
1.161  
1.153  
1.147  
1.136  
1.124  
1.113  
1.103  
1.092  
0.864  
0.850  
0.836  
-0.000

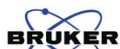

Current Data Parameters  
NAME SYDA ASCND 500  
EXPNO 128  
PROCNO 1  
F2 - Acquisition Parameters  
Date\_ 20210924  
Time 12.11 h  
INSTRUM spect  
PROBHD 519470\_0291\_0  
PULPROG zgpg30  
TD 65536  
SOLVENT CDCl3  
NS 2  
DS 2  
SWH 10000.000 Hz  
FIDRES 0.355176 Hz  
AQ 3.278799 sec  
RG 36.69  
DM 50.000 usec  
DE 6.50 usec  
TE 299.2 K  
D1 1.00000000 sec  
TSD  
SFO1 500.3720898 MHz  
NUC1 1H  
P1 10.00 usec  
PL1 23.23100000 W  
F2 - Processing parameters  
SI 65536  
SF 500.3695117 MHz  
WDW EM  
SSB 0  
LB 0.30 Hz  
GB 0  
PC 1.00

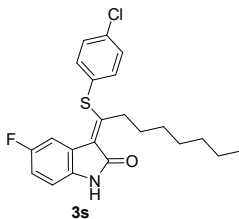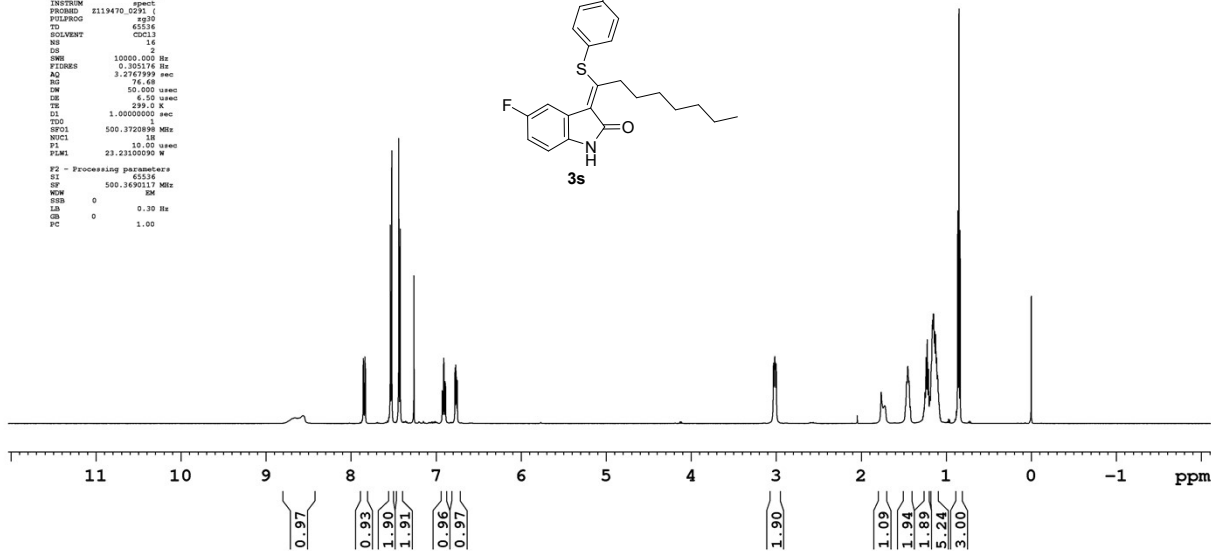

SYDA - 209-1

163.970  
159.658  
157.305  
137.195  
136.837  
129.882  
127.011  
124.708  
114.120  
113.879  
112.973  
112.699  
109.289  
31.777  
31.207  
30.164  
29.489  
28.851  
22.732  
14.199

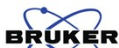

Current Data Parameters  
NAME SYDA-Detected 400  
EXPNO 32  
PROCNO 1  
F2 - Acquisition Parameters  
Date\_ 20210923  
Time 17.14 h  
INSTRUM spect  
PROBHD 519470\_0291\_0  
PULPROG zgpg30  
TD 65536  
SOLVENT CDCl3  
NS 2  
DS 2  
SWH 24038.461 Hz  
FIDRES 0.733204 Hz  
AQ 1.363488 sec  
RG 645  
DM 20.800 usec  
DE 6.50 usec  
TE 667.7 K  
D1 2.00000000 sec  
D11 0.03000000 sec  
TSD  
SFO1 100.6300203 MHz  
NUC1 13C  
P1 2.13 usec  
PL1 10.00 usec  
PL2 69.4399860 W  
SFO2 400.3926004 MHz  
NUC2 1H  
CPDPRG2 waltz165  
F2 - Processing parameters  
SI 65536  
SF 100.6299977 MHz  
WDW EM  
SSB 0  
LB 1.00 Hz  
GB 0  
PC 1.00

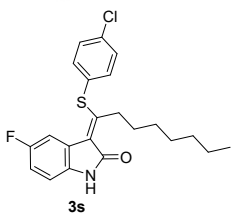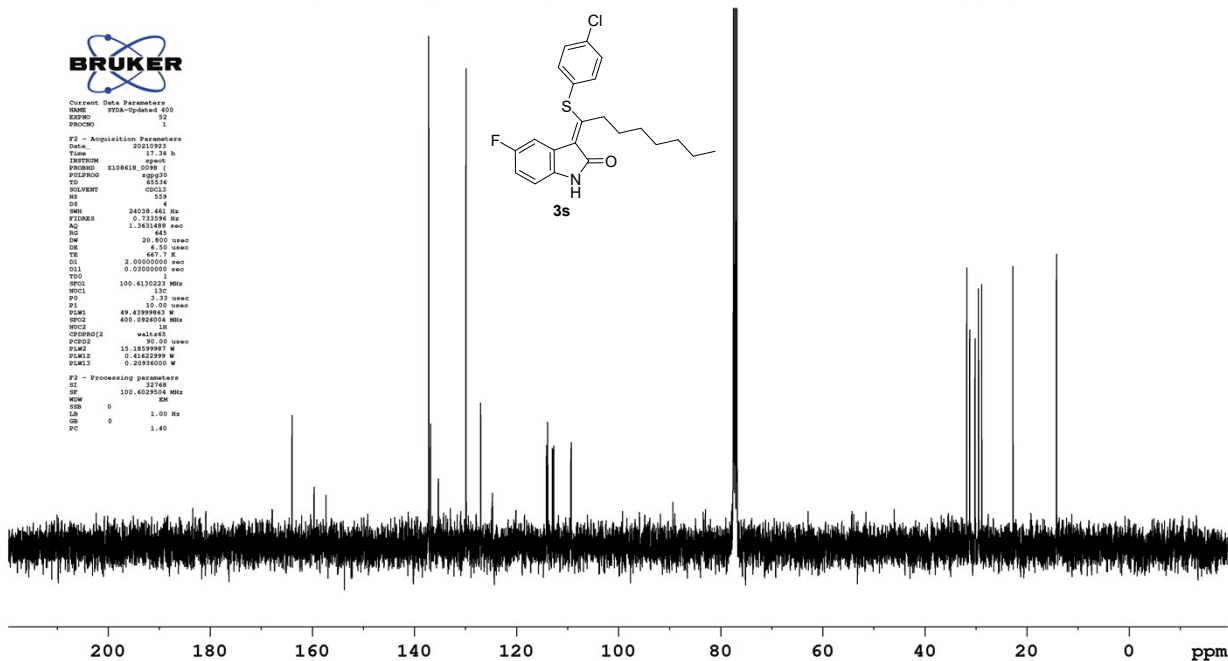

SYPR-4-304-S3

8.089  
8.073  
7.926  
7.577  
7.573  
7.564  
7.560  
7.555  
7.464  
7.459  
7.455  
7.446  
7.442  
7.258  
7.218  
7.216  
7.203  
7.201  
7.187  
7.185  
7.070  
7.068  
7.055  
7.053  
7.039  
7.037  
6.849  
6.834  
3.038  
3.028  
3.023  
3.018  
3.007  
3.001  
1.601  
1.470  
1.460  
1.455  
1.448  
1.440  
1.251  
1.239  
1.225  
1.211  
1.180  
1.166  
1.154  
1.150  
1.143  
1.137  
1.126  
1.114  
1.105  
1.101  
0.866  
0.851  
0.837  
-0.000

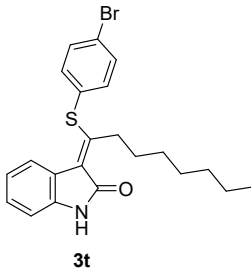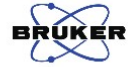

Current Data Parameters  
NAME SYPR-ASCEND-500  
EXPNO 419  
PROCNO 1  
F2 - Acquisition Parameters  
Date\_ 20210920  
Time 10.42 h  
INSTRUM spect  
PROBHD 519470 0294 (i  
PULPROG zgpg30  
TD 65536  
SOLVENT CDCl3  
NS 16  
DS 2  
SWH 10000.000 KHz  
FIDRES 0.305176 KHz  
AQ 3.2787399 sec  
RG 108.78  
DM 50.000 usec  
DE 6.50 usec  
TE 303.4 K  
D1 1.00000000 sec  
TEC 2  
SFO1 500.372088 MHz  
NUC1 1H  
P1 10.00 usec  
PL1 23.23100090 W  
F2 - Processing Parameters  
SI 65536  
SF 500.3690127 MHz  
WDW EM  
SS 0  
LB 0.30 KHz  
GB 0  
PC 1.00

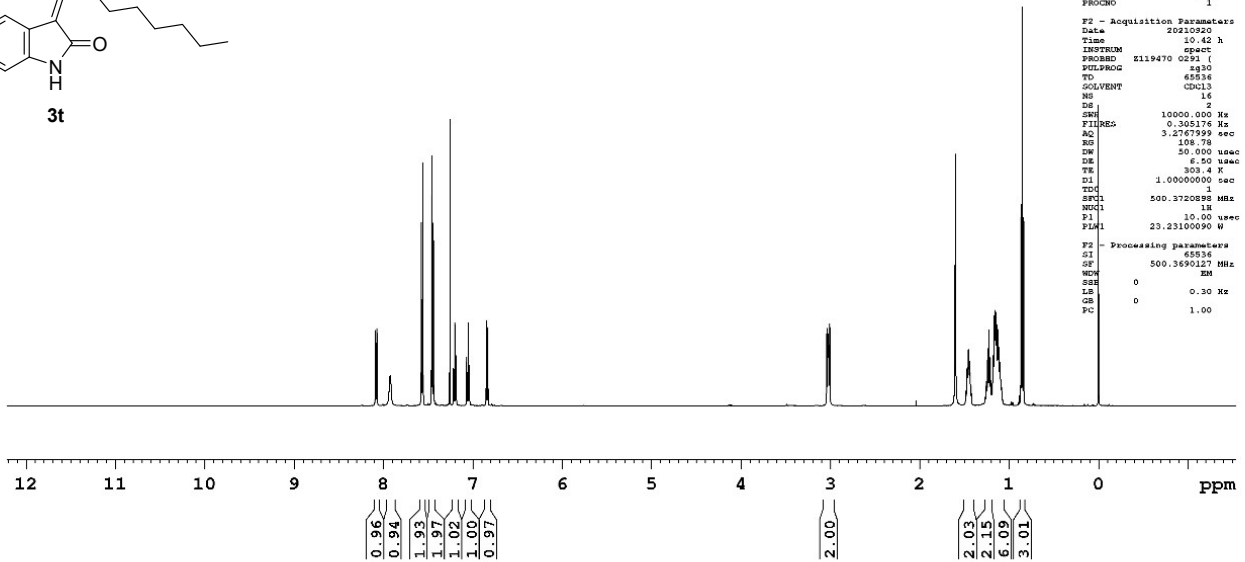

SYPR-4-304-S3

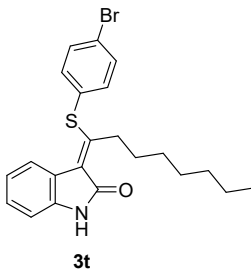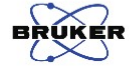

Current Data Parameters  
NAME SYPR-400-000-001  
EXPNO 200  
PROCNO 1  
F2 - Acquisition Parameters  
Date\_ 20210920  
Time 15.56 h  
INSTRUM spect  
PROBHD 5106618\_0098 (i  
PULPROG zgpg30  
TD 65536  
SOLVENT CDCl3  
NS 997  
DS 4  
SWH 24038.461 KHz  
FIDRES 0.733056 KHz  
AQ 1.3631488 sec  
RG 1030  
DM 20.800 usec  
DE 6.50 usec  
TE 303.4 K  
D1 2.00000000 sec  
D11 0.03000000 sec  
FID 1  
SFO1 100.6138223 MHz  
NUC1 13C  
P1 2.33 usec  
PL1 15.80 usec  
PL12 49.43997803 W  
SFO2 400.8926004 MHz  
NUC2 13C  
CPDPRG2 waltz160  
PCPD2 90.00 usec  
PLM2 15.18599887 W  
PLM12 0.41622998 W  
PLM13 0.20936000 W  
F2 - Processing Parameters  
SI 20708  
SF 100.6029324 MHz  
WDW EM  
SS 0  
LB 1.00 KHz  
GB 0  
PC 1.40

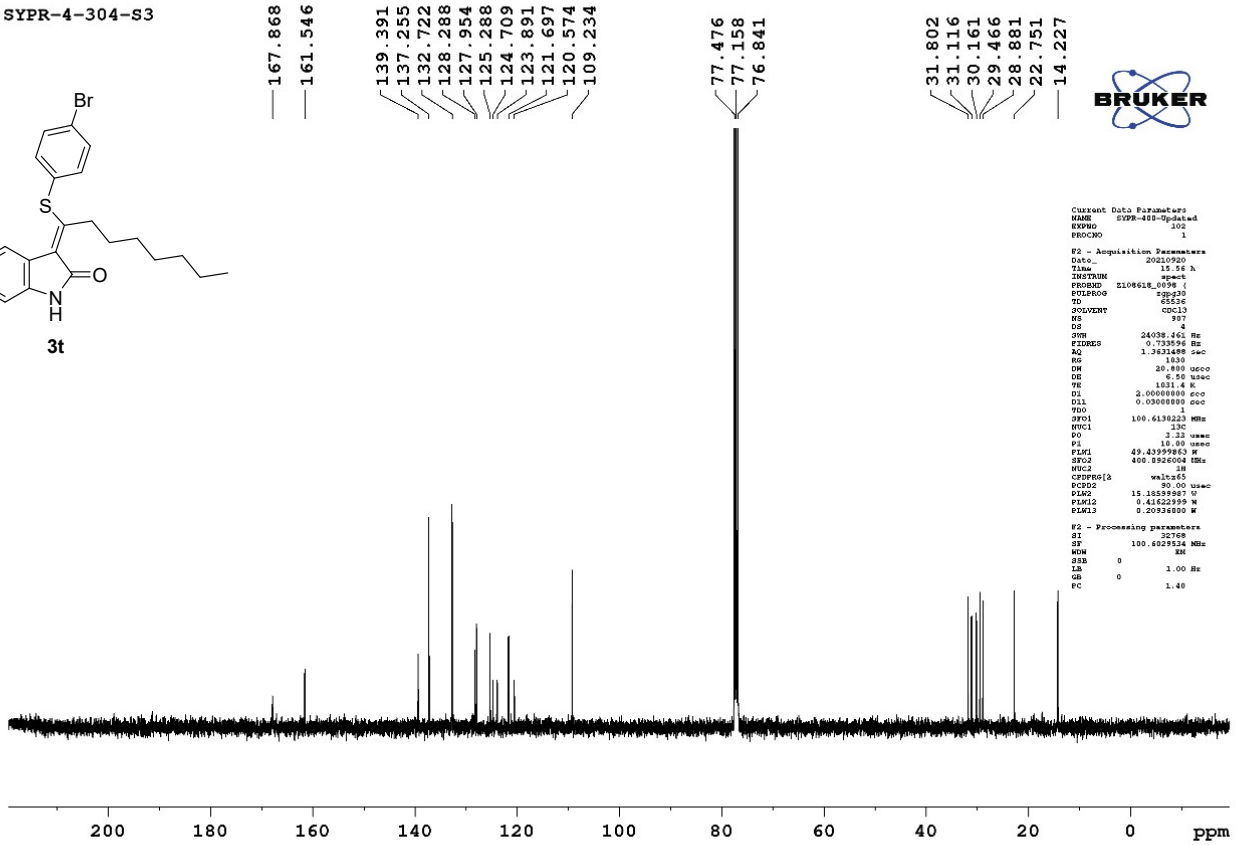

204-1

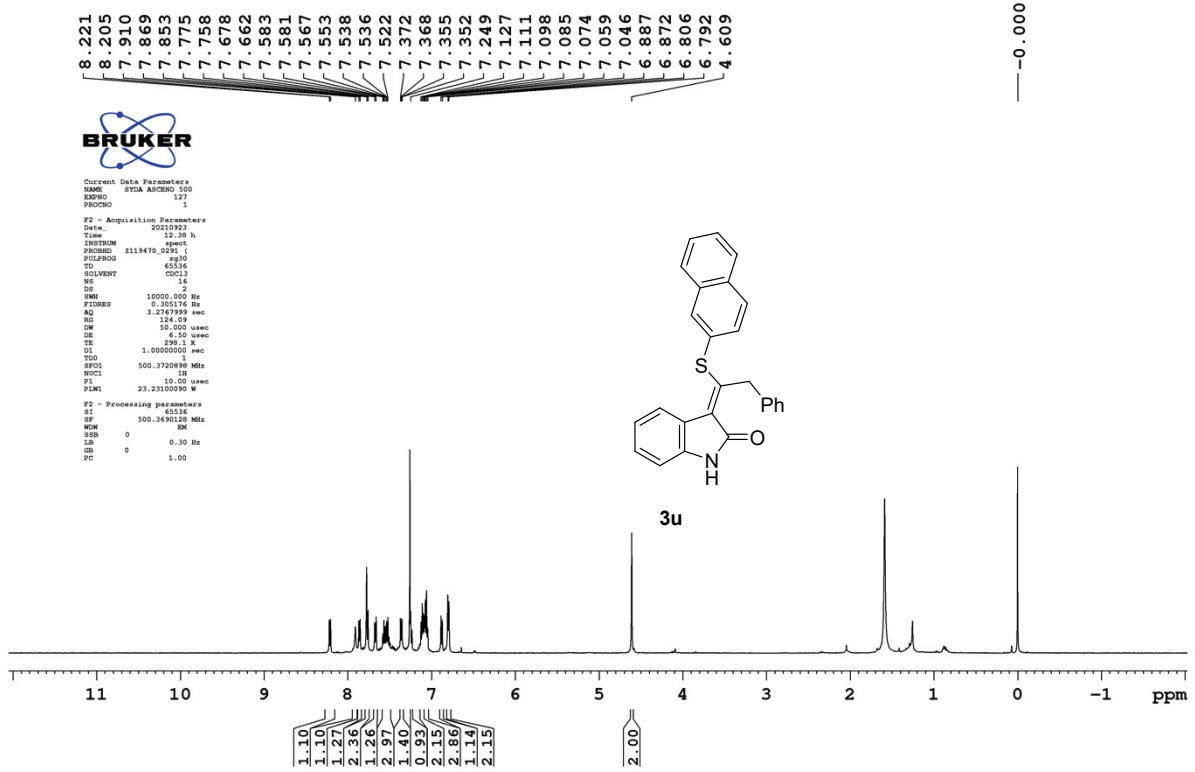

SYDA - 204-1

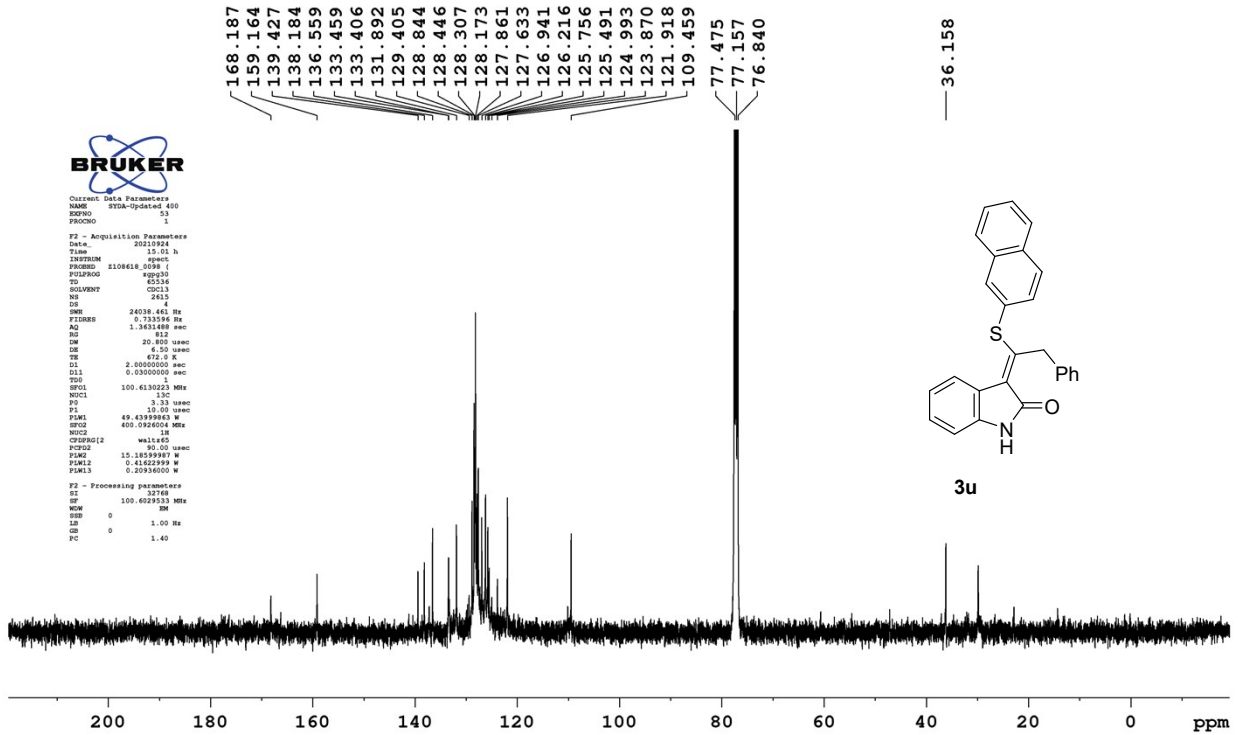

SYDA-NS

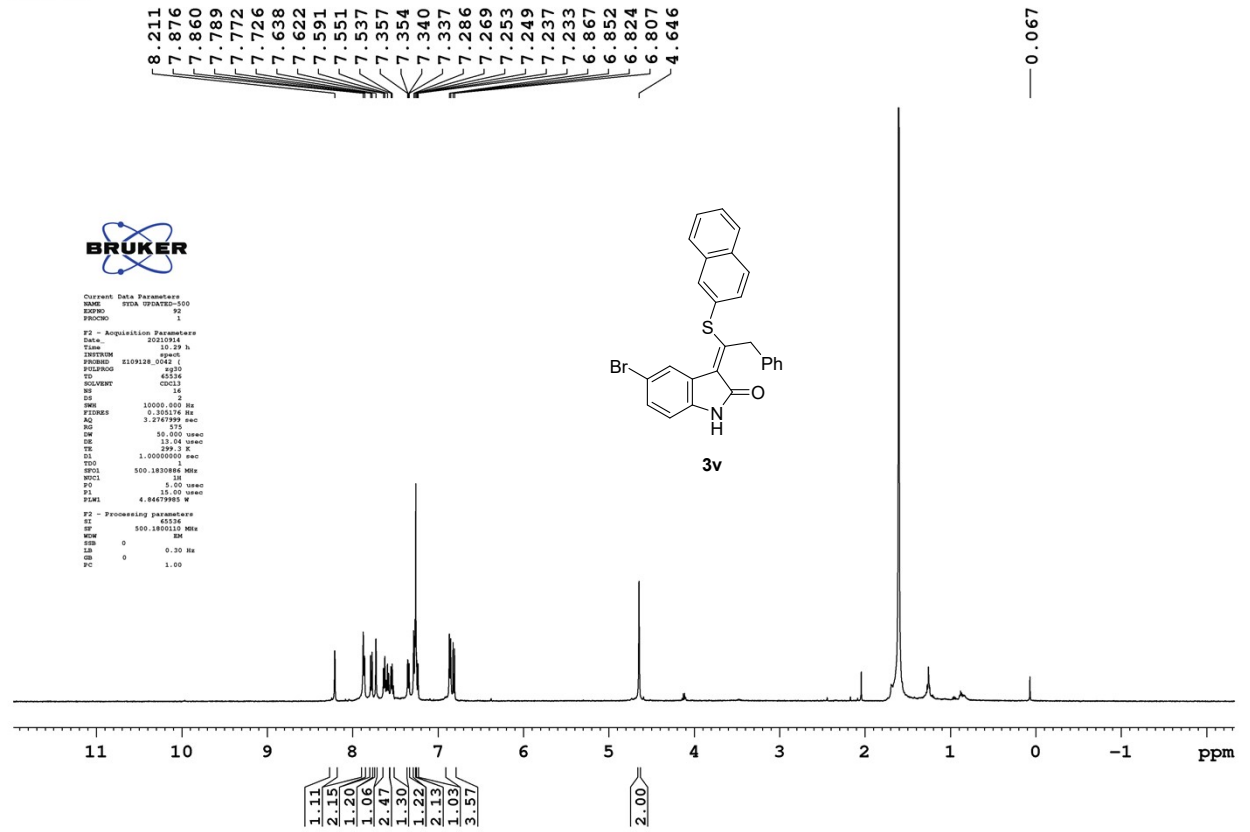

SYDA - NS

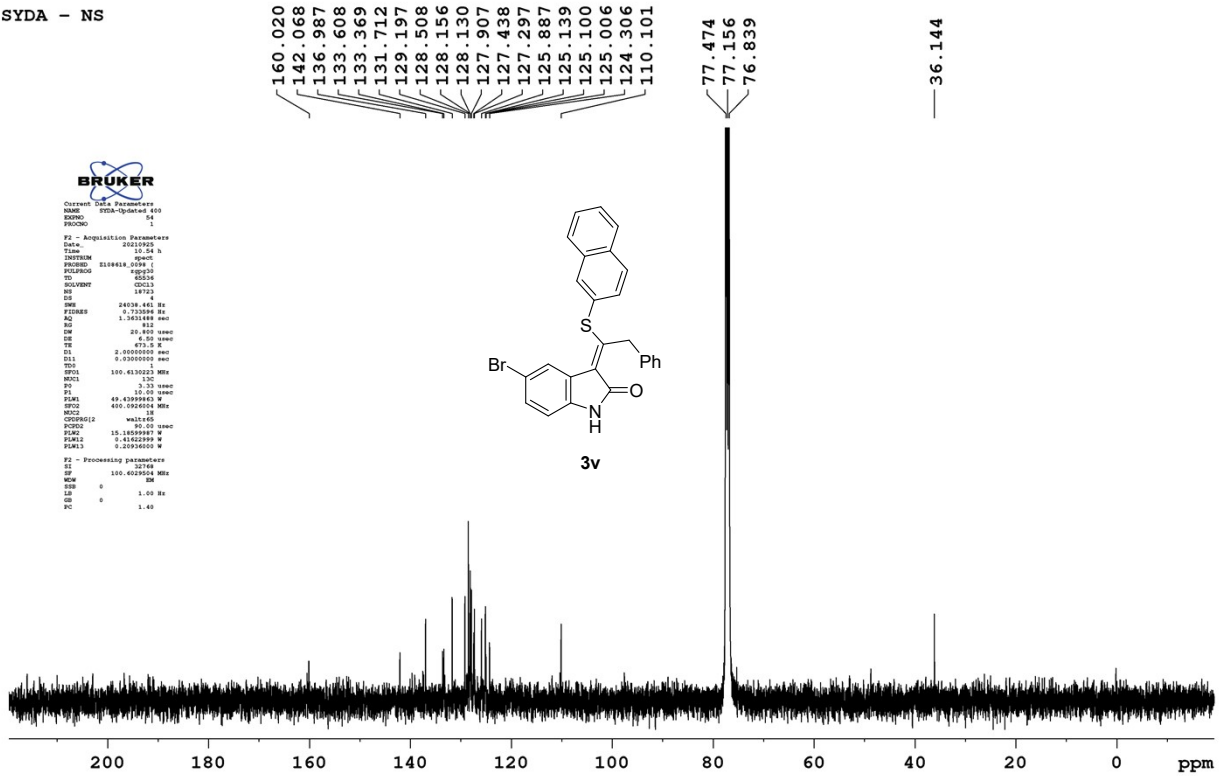

SY ALI-C4

7.937  
7.932  
7.977  
7.972  
7.949  
7.875  
7.859  
7.785  
7.775  
7.772  
7.770  
7.682  
7.666  
7.594  
7.592  
7.580  
7.578  
7.564  
7.562  
7.547  
7.544  
7.531  
7.517  
7.382  
7.359  
7.345  
7.342  
7.260  
7.106  
7.092  
7.078  
7.066  
7.063  
7.049  
6.977  
6.960  
6.955  
6.942  
6.937  
6.800  
6.791  
6.782  
6.776  
6.774  
4.606

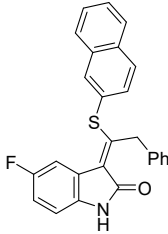

3w

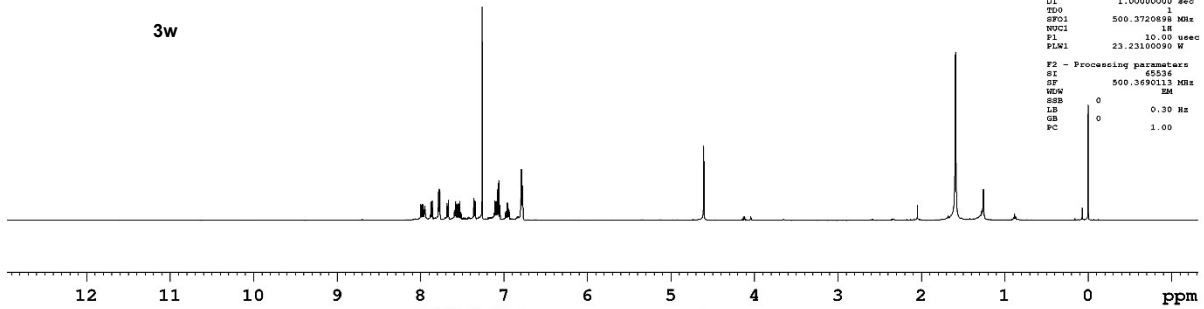

1.20  
0.92  
1.30  
2.40  
1.32  
1.26  
1.16  
1.19  
3.31  
1.20  
3.17  
2.00

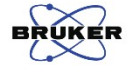

Current Data Parameters  
NAME: ALI YOR ASCEND 500  
EXPNO: 3  
PROCNO: 1

F2 - Acquisition Parameters  
Date\_: 20210921  
Time: 16.09 h  
INSTRUM: spect  
PROBHD: Z113470 0291 (4  
PULPROG: zgpg30  
TD: 65536  
SOLVENT: CDCl3  
NS: 16  
DS: 4  
SWH: 10000.000 Hz  
FIDRES: 0.300176 Hz  
AQ: 3.276789 sec  
RG: 139.3  
DM: 50.000 usec  
DE: 6.50 usec  
TE: 298.2 K  
D1: 1.0000000 sec  
TDO: 0  
SFO1: 500.3720898 MHz  
NUC1: 1H  
P1: 10.00 usec  
PLW1: 23.23100090 W

F2 - Processing parameters  
SI: 65536  
SF: 500.3690113 MHz  
WDW: EM  
SSB: 0  
LB: 0.30 Hz  
GB: 0  
PC: 1.00

-0.000

YSR ALI C4

167.723  
161.398  
137.910  
136.771  
135.160  
133.587  
133.435  
131.833  
129.004  
128.419  
128.253  
128.217  
127.910  
127.806  
127.056  
126.352  
124.895  
114.502  
114.308  
113.511  
113.256  
109.424  
109.354  
100.140  
77.415  
77.160  
76.907  
36.227

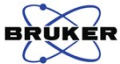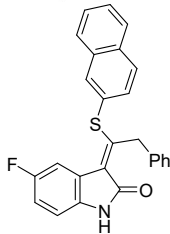

3w

Current Data Parameters  
NAME: ALI YOR ASCEND 500  
EXPNO: 7  
PROCNO: 1

F2 - Acquisition Parameters  
Date\_: 20211023  
Time: 10.44 h  
INSTRUM: spect  
PROBHD: Z113331 0056 (4  
PULPROG: zgpg30  
TD: 65536  
SOLVENT: CDCl3  
NS: 1571  
DS: 4  
SWH: 29761.908 Hz  
FIDRES: 0.98261 Hz  
AQ: 1.1010048 sec  
RG: 15.92  
DM: 16.800 usec  
DE: 6.50 usec  
TE: 298.2 K  
D1: 2.0000000 sec  
D11: 0.03000000 sec  
TDO: 0  
SFO1: 125.8304669 MHz  
NUC1: 13C  
P1: 12.00 usec  
PLW1: 173.6699817 W  
SFO2: 500.3710015 MHz  
NUC2: 1H  
CPDPRG2: waltz16  
PCPD2: 88.00 usec  
PLM2: 12.18000001 W  
PLM3: 0.12180000 W  
PLM4: 0.00121800 W

F2 - Processing parameters  
SI: 32768  
SF: 125.8174668 MHz  
WDW: EM  
SSB: 0  
LB: 1.00 Hz  
GB: 0  
PC: 1.40

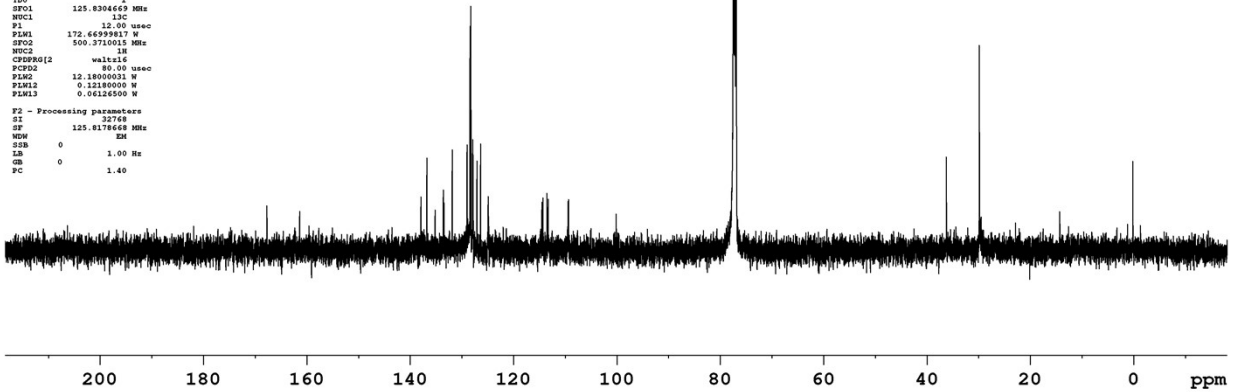



SYDA-208-2

8.007  
 7.992  
 7.873  
 7.857  
 7.774  
 7.765  
 7.741  
 7.676  
 7.660  
 7.577  
 7.562  
 7.543  
 7.528  
 7.363  
 7.346  
 7.259  
 7.101  
 7.087  
 7.073  
 7.058  
 7.044  
 6.787  
 6.773  
 4.605

-0.000

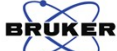

Current Data Parameters  
 NAME SYDA-UPDATE-500  
 EXPNO 4  
 PROCNO 1  
 F2 - Acquisition Parameters  
 Date\_ 20210921  
 Time 15:17 h  
 INSTRUM spect  
 FREQID 5109128.0042 f  
 PULPROG zgpg30  
 TD 65536  
 SOLVENT CMC13  
 NS 16  
 DS 2  
 SWH 10000.000 Hz  
 FIDRES 0.305176 Hz  
 AQ 3.2747079 sec  
 RG 575  
 DW 50.0000 usec  
 DE 13.04 usec  
 TE 298.4 K  
 D1 1.00000000 sec  
 TDO  
 SFO1 500.1830886 MHz  
 NUC1 1H  
 PD 5.00 usec  
 P1 151.00 usec  
 PL1 4.84679985 W  
 F2 - Processing parameters  
 SI 65536  
 SF 500.1800100 MHz  
 WDW RM  
 SSB 0  
 LB 0.30 Hz  
 GB 0  
 PC 1.00

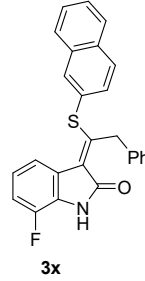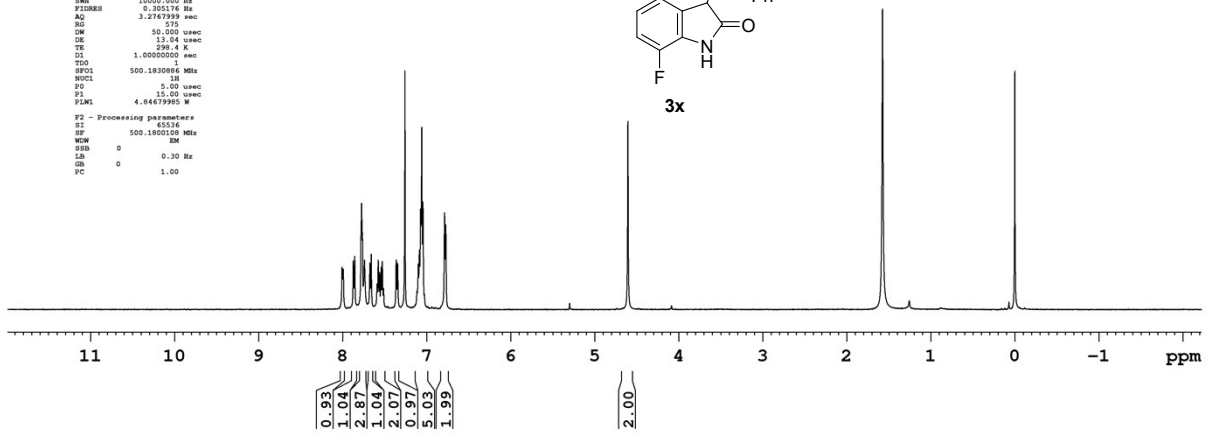

SYDA - 208-2

166.782  
 161.585  
 137.865  
 136.767  
 133.561  
 133.408  
 131.850  
 128.974  
 128.400  
 128.228  
 127.893  
 127.789  
 127.039  
 126.519  
 126.323  
 124.979  
 122.298  
 121.537  
 115.078  
 114.904

77.474  
77.157  
76.839

36.072

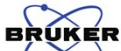

Current Data Parameters  
 NAME SYDA-UPDATE-600  
 EXPNO 50  
 PROCNO 1  
 F2 - Acquisition Parameters  
 Date\_ 20210922  
 Time 12:56 h  
 INSTRUM spect  
 FREQID 5108619.0098 f  
 PULPROG zgpg30  
 TD 65536  
 SOLVENT CMC13  
 NS 16  
 DS 2  
 SWH 24038.461 Hz  
 FIDRES 0.733396 Hz  
 AQ 1.3631488 sec  
 RG 512  
 DW 20.800 usec  
 DE 6.50 usec  
 TE 871.7 K  
 D1 2.00000000 sec  
 D11 0.03000000 sec  
 TDO  
 SFO1 100.6130223 MHz  
 NUC1 13C  
 PD 3.33 usec  
 P1 10.00 usec  
 PL1 49.43999603 W  
 PL2 400.00000004 MHz  
 NUC2 1H  
 CPOPRG2 waltz165  
 PFG2 90.00 usec  
 PLM2 10.18599987 W  
 PLM3 0.41622999 W  
 PLM13 0.20936000 W  
 F2 - Processing parameters  
 SI 32768  
 SF 100.6029511 MHz  
 WDW EM  
 SSB 0  
 LB 1.00 Hz  
 GB 0  
 PC 1.40

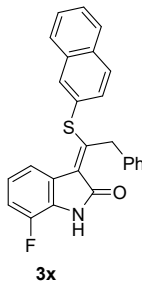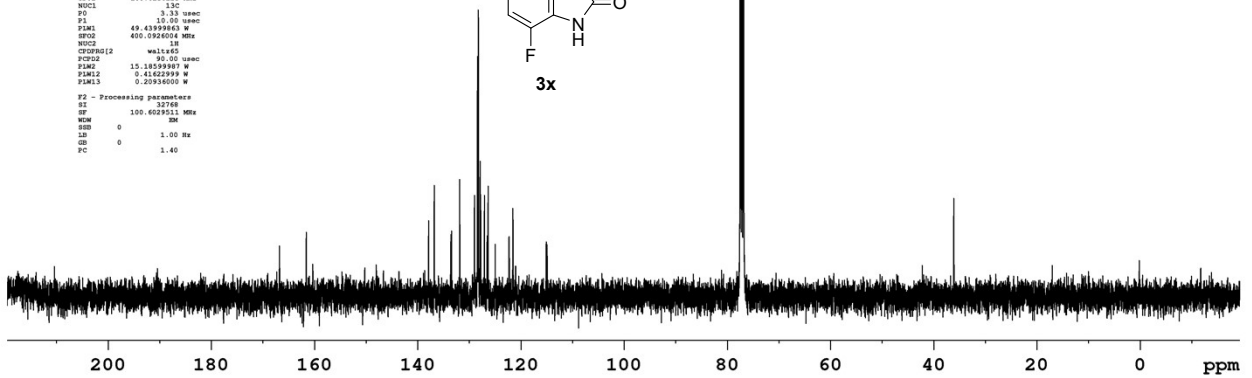



207-3

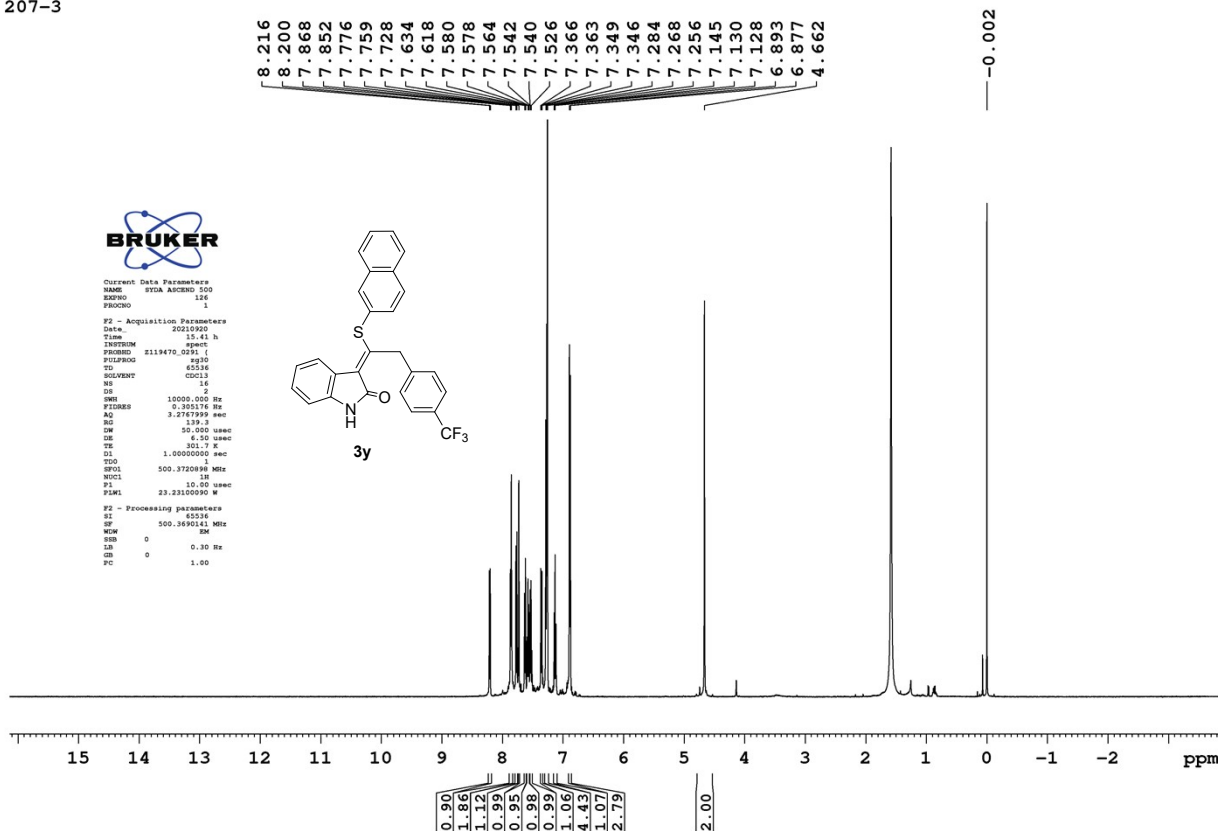

SYDA - 207-3

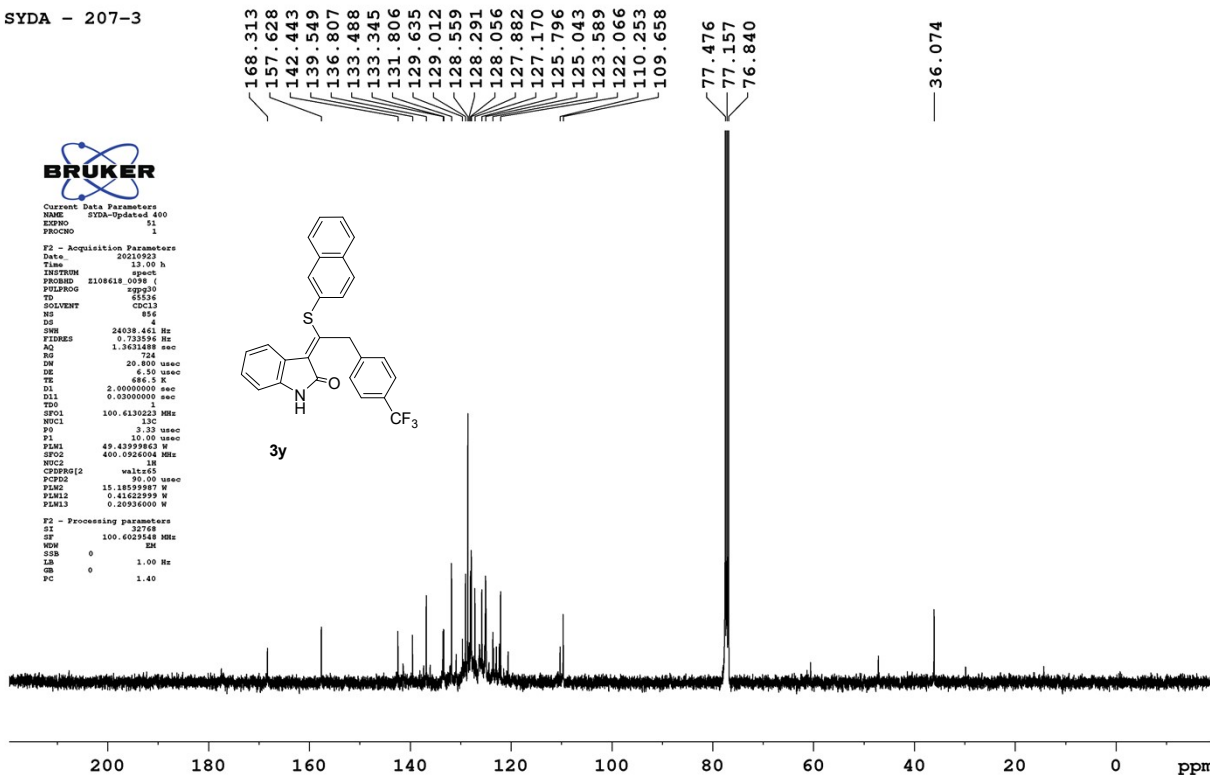

SYDA-207-3

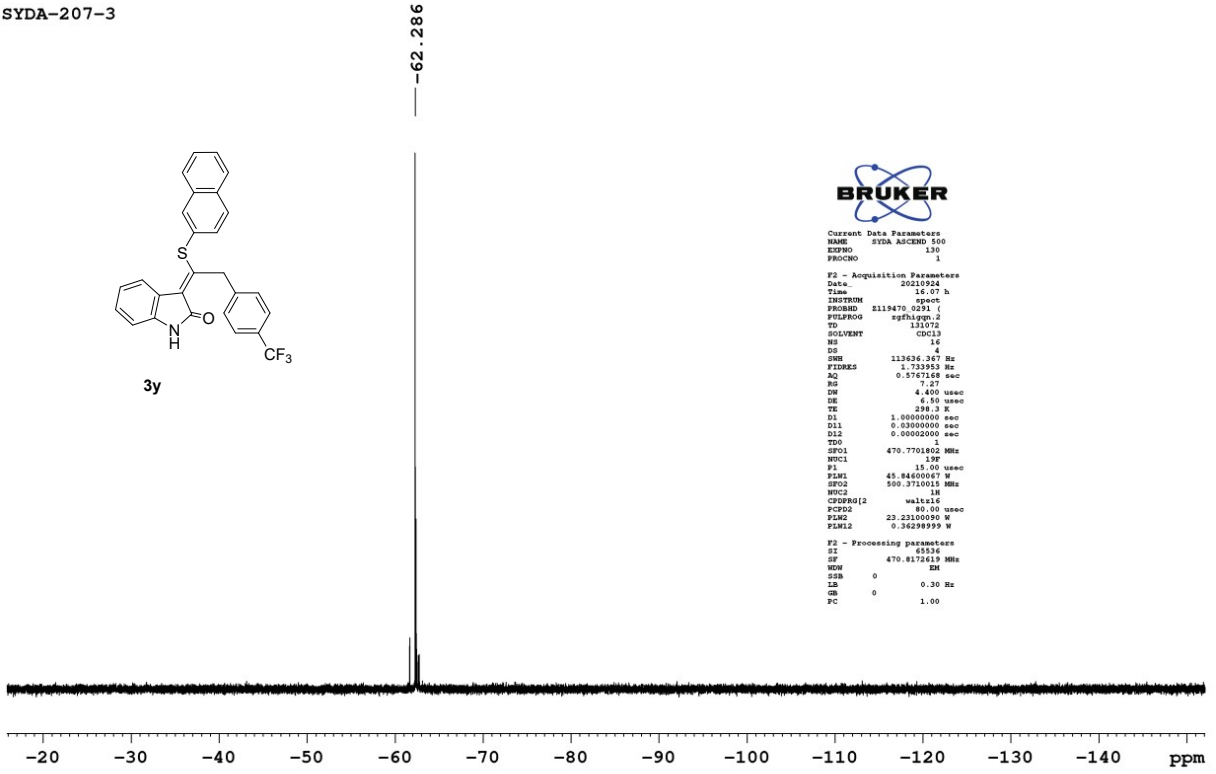

SYDA-209-3

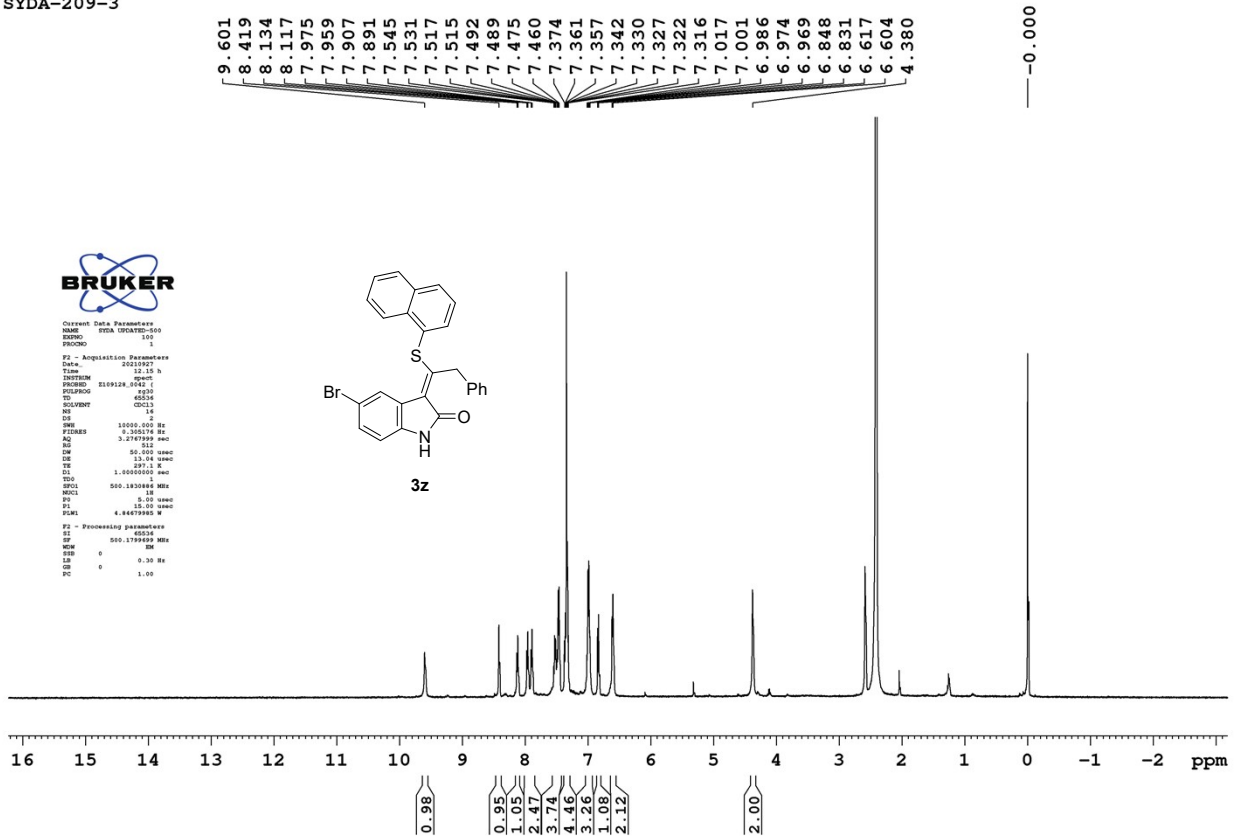

SYDA-209-3

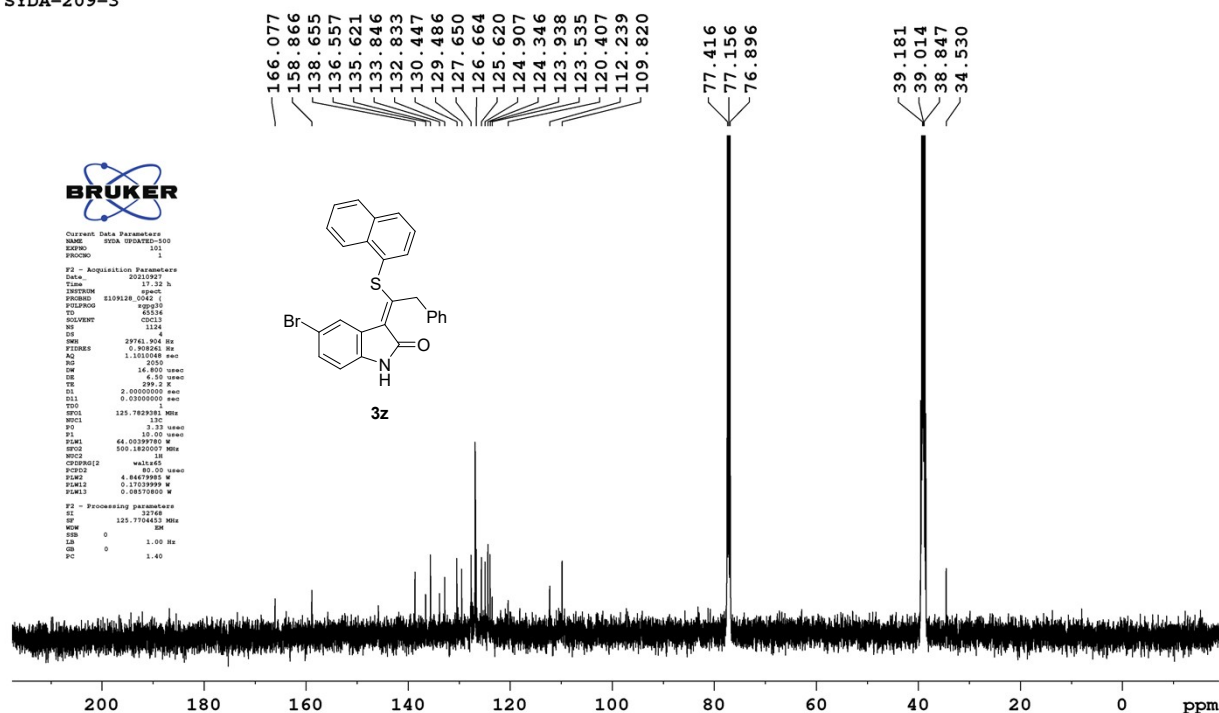

SYDA-209-2

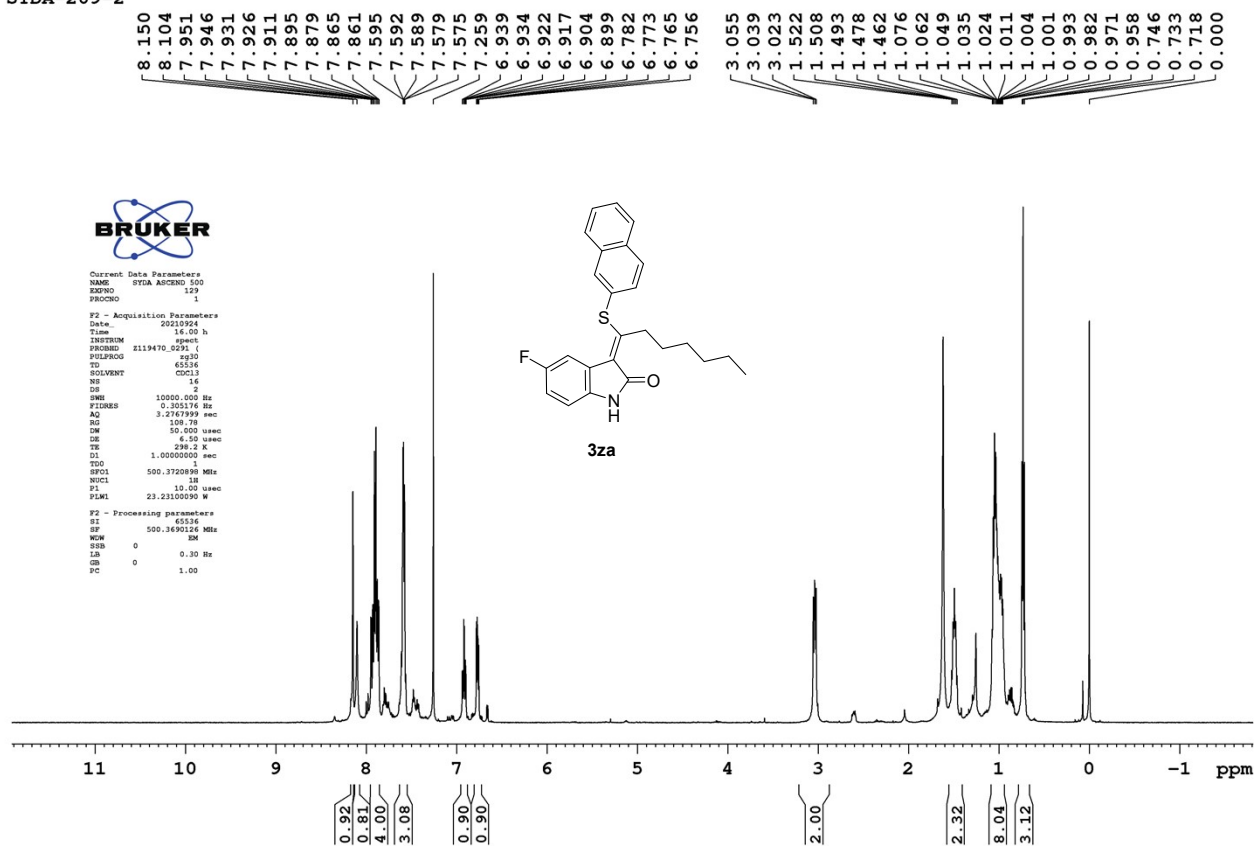

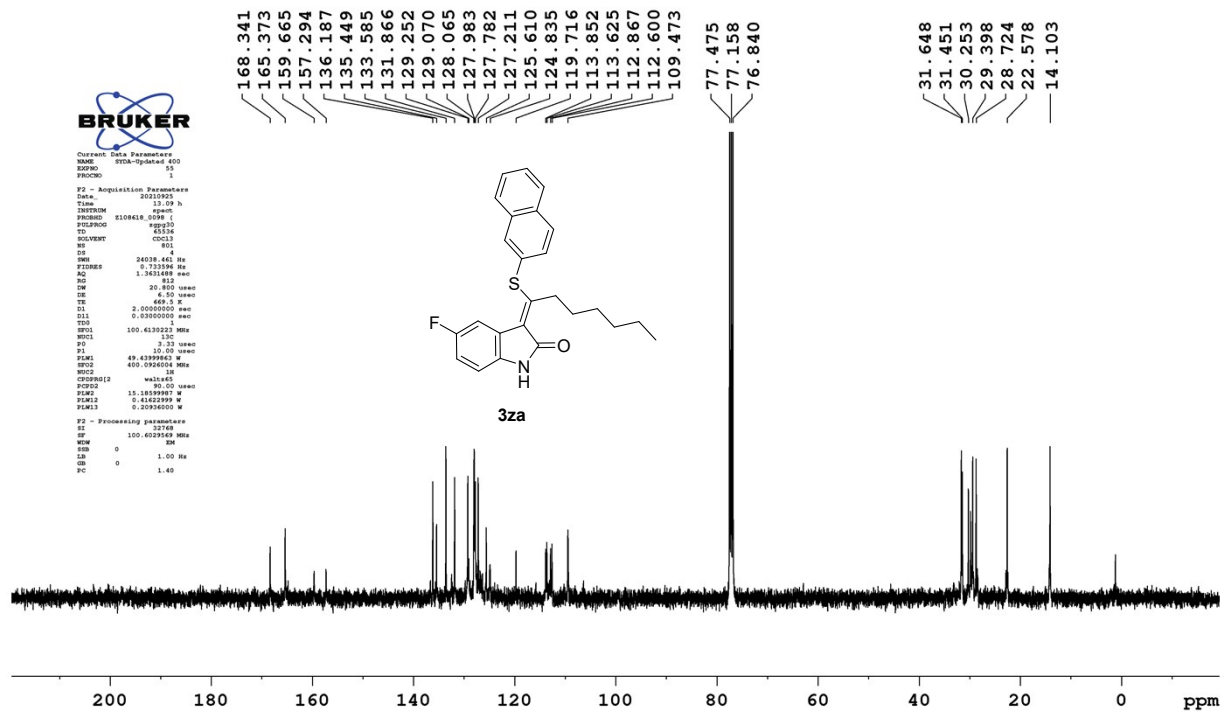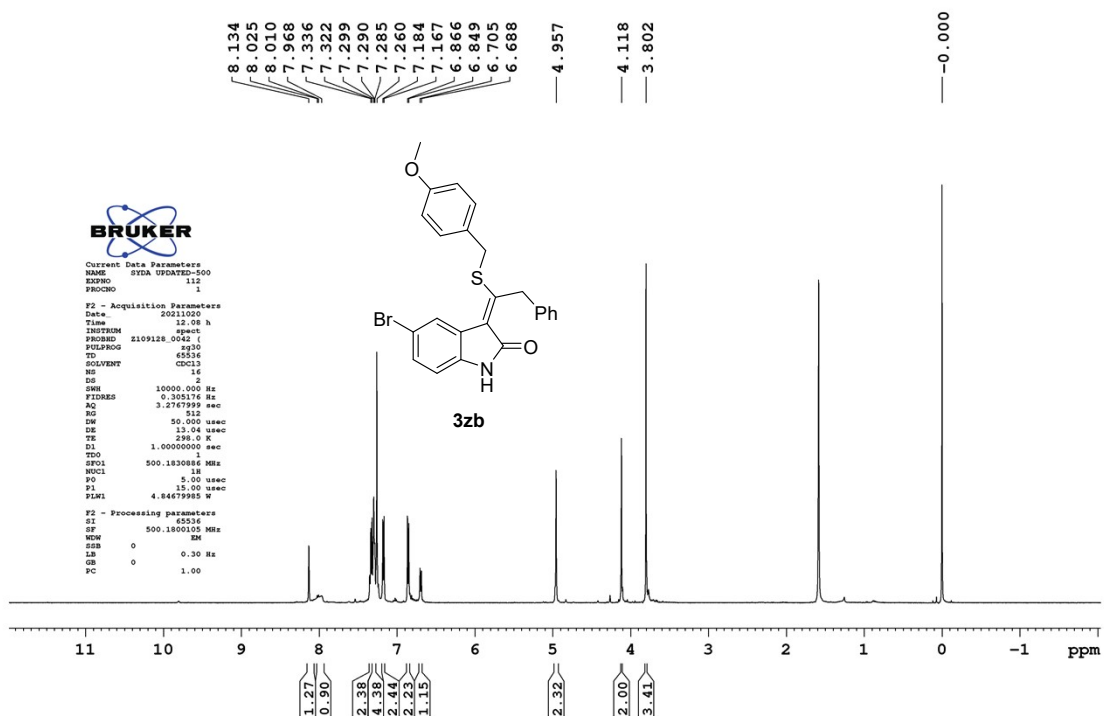

SYDA-BT

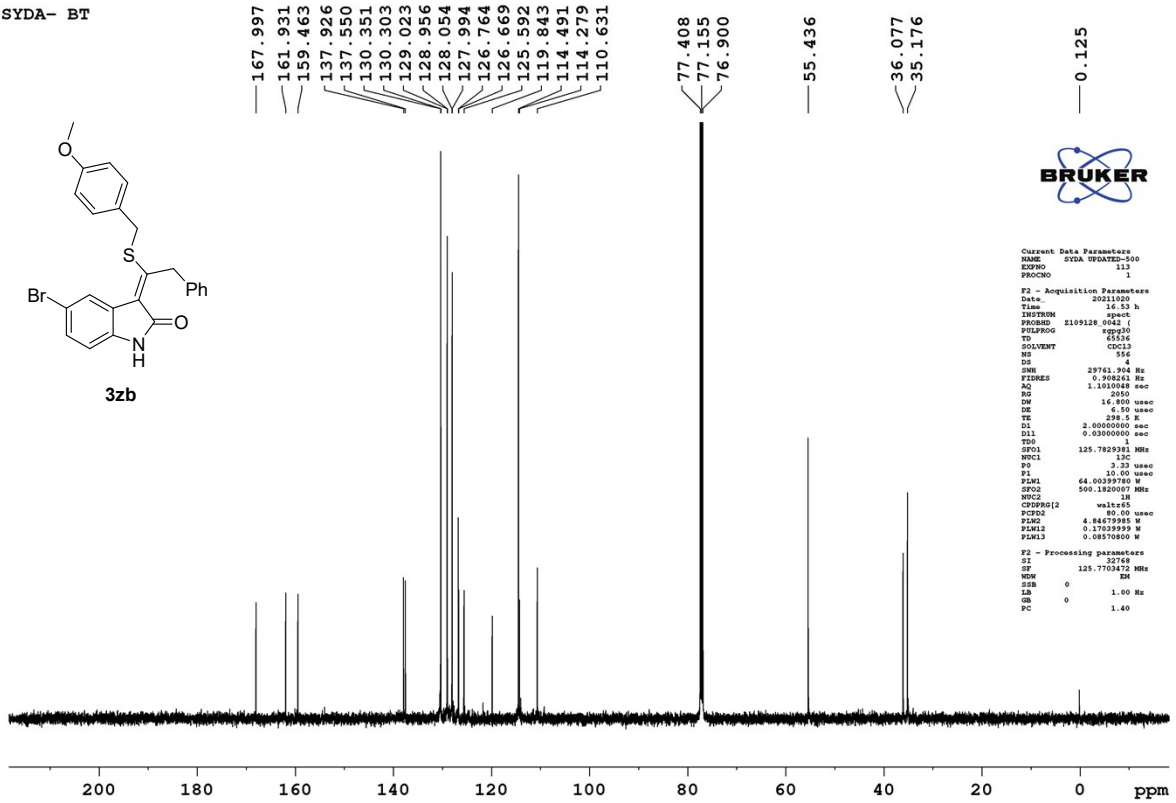

SYDA-Z15

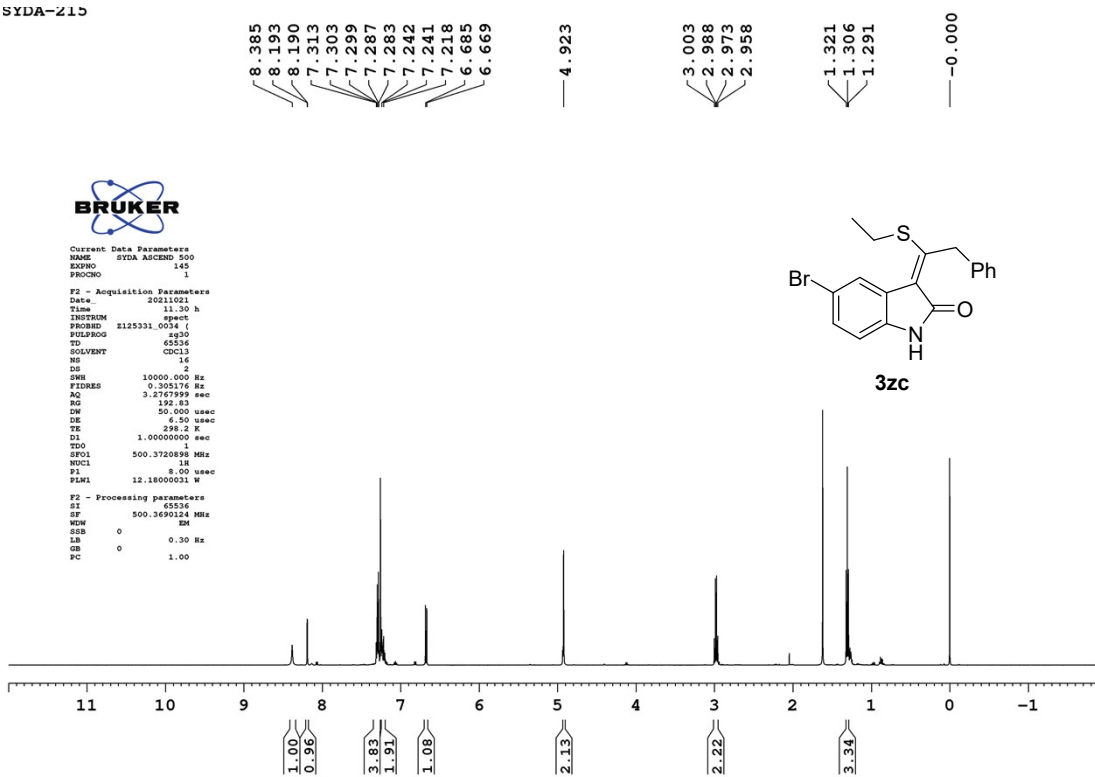

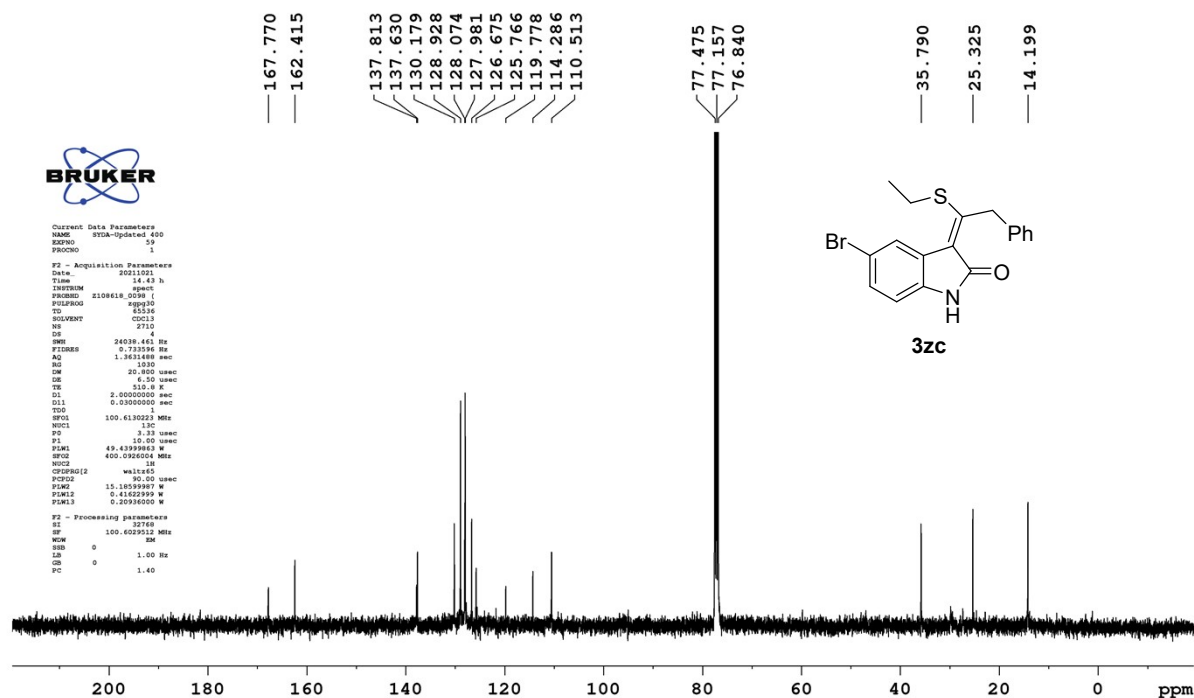

SYTK-83 A

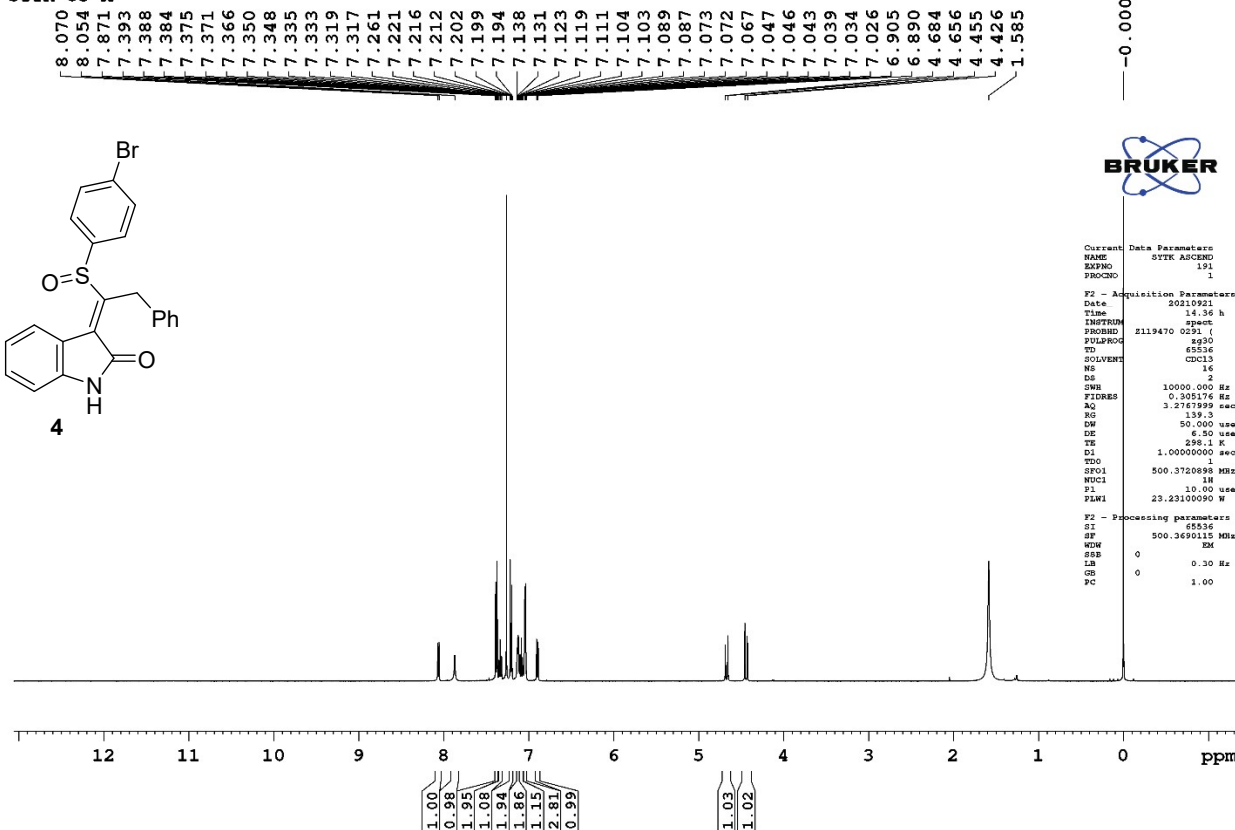

SYTK-83 A

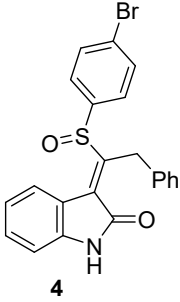

167.115  
158.567  
142.706  
140.183  
137.458  
136.743  
131.011  
130.168  
129.069  
129.023  
127.783  
127.038  
125.742  
125.091  
122.041  
121.464  
110.694

77.479  
77.160  
76.841

40.612  
40.391  
40.181  
39.972  
39.764  
39.559  
39.345  
27.395

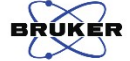

```

Current Data Parameters
NAME      TK-400 updated
EXPNO    52
PROCNO   1

F2 - Acquisition Parameters
Date_    20210923
Time     15:43 h
INSTRUM  spect
PROBHD   Z108618_0098 (
PULPROG  zgpg30
TD        65536
SOLVENT  CDCl3
NS        1024
DS        4
SWH       24038.461 Hz
FIDRES   0.73396 Hz
AQ        1.3631489 sec
RG        203
DM        20.800 usec
DE        6.50 usec
TE        666.3 K
D1        2.0000000 sec
d11       0.0300000 sec
TDO       1
SFO1     100.6130223 MHz
NUC1      13C
P1        3.33 usec
P2        10.00 usec
PLH1     45.45999863 W
SFO2     400.0926004 MHz
NUC2      1H
CPDPRG2  waltz65
PCPD2    90.00 usec
PLH2     15.18599987 W
PLH3     0.41622999 W
PLH4     0.20936000 W

F2 - Processing parameters
SI        32768
SF        100.6026620 MHz
WDW       EM
SSB       0
LB        1.00 Hz
GB        0
PC        1.40
  
```

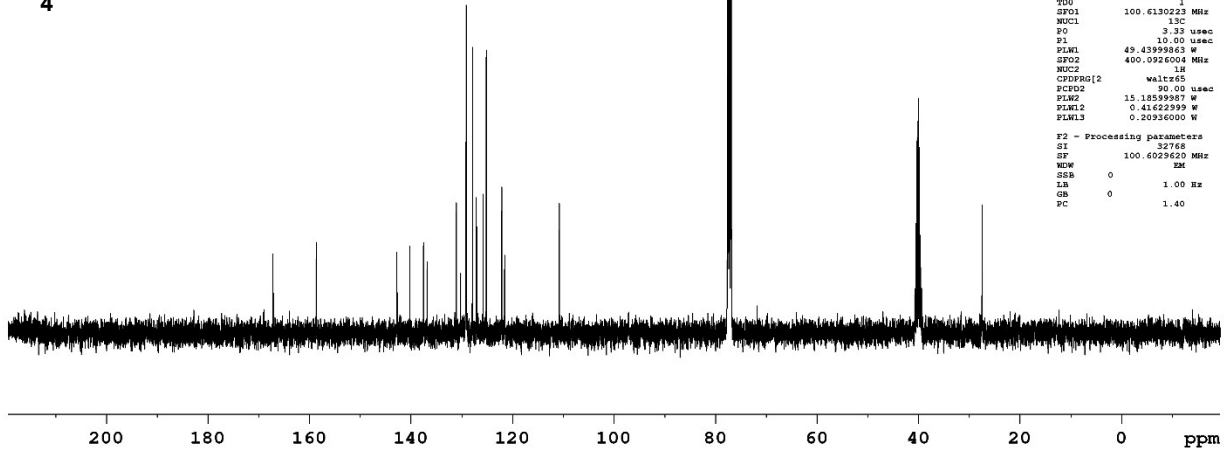

SYTK-83 A

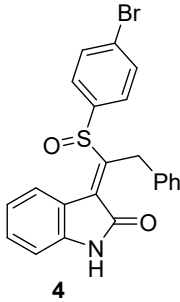

131.008  
129.065  
129.018  
127.781  
127.035  
125.739  
125.085  
122.036  
110.696

27.395

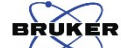

```

Current Data Parameters
NAME      TK-400 updated
EXPNO    51
PROCNO   1

F2 - Acquisition Parameters
Date_    20210923
Time     14:45 h
INSTRUM  spect
PROBHD   Z108618_0098 (
PULPROG  zgpg30
TD        65536
SOLVENT  CDCl3
NS        1024
DS        4
SWH       24038.461 Hz
FIDRES   0.73396 Hz
AQ        1.3631489 sec
RG        203
DM        20.800 usec
DE        6.50 usec
TE        666.3 K
D1        2.0000000 sec
d11       0.0300000 sec
TDO       1
SFO1     100.6130223 MHz
NUC1      13C
P1        3.33 usec
P2        10.00 usec
PLH1     45.45999863 W
SFO2     400.0926004 MHz
NUC2      1H
CPDPRG2  waltz65
PCPD2    90.00 usec
PLH2     15.18599987 W
PLH3     0.41622999 W
PLH4     0.20936000 W

F2 - Processing parameters
SI        32768
SF        100.6026620 MHz
WDW       EM
SSB       0
LB        1.00 Hz
GB        0
PC        1.40
  
```

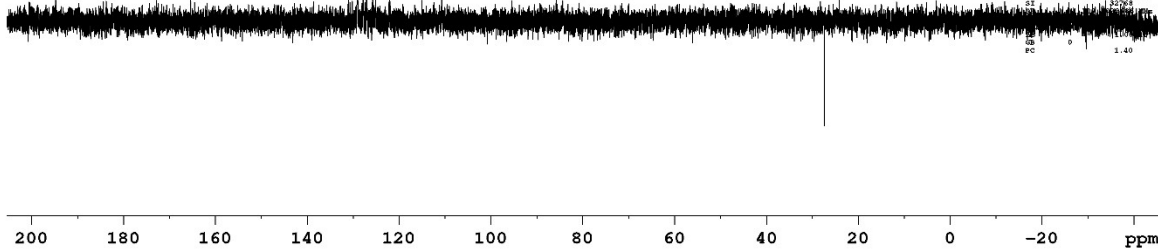

SYTK-85

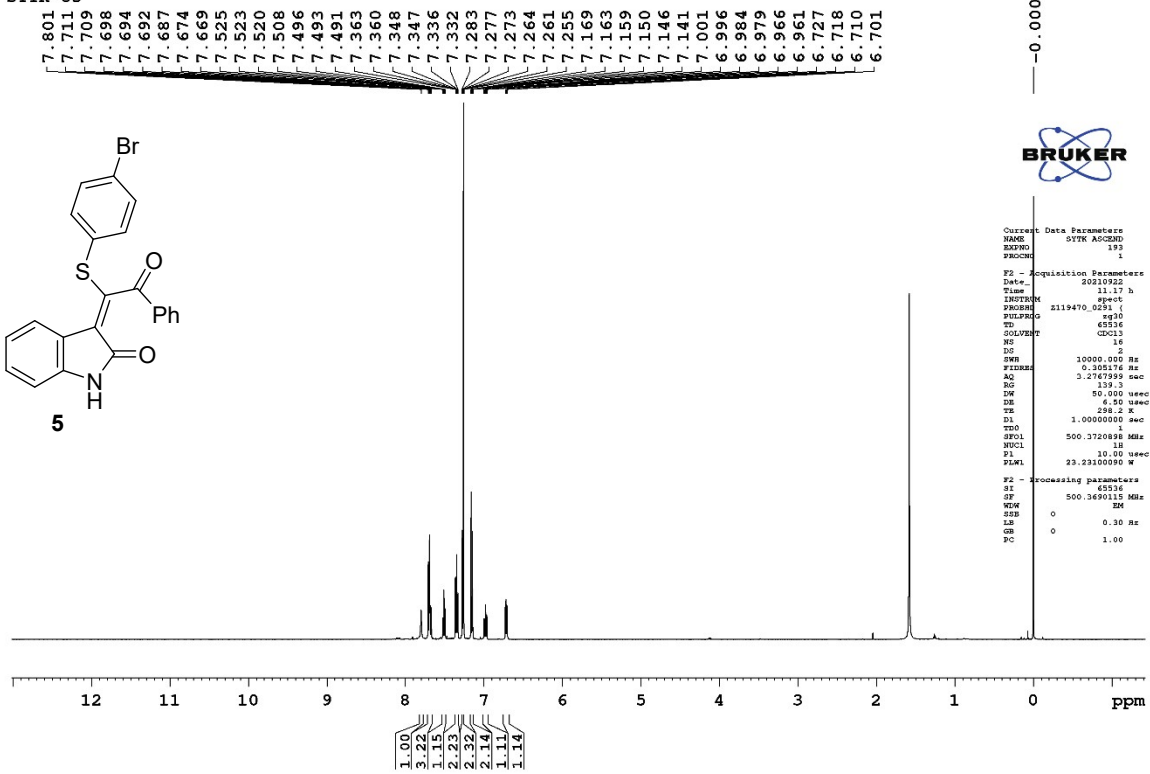

SYTK-85

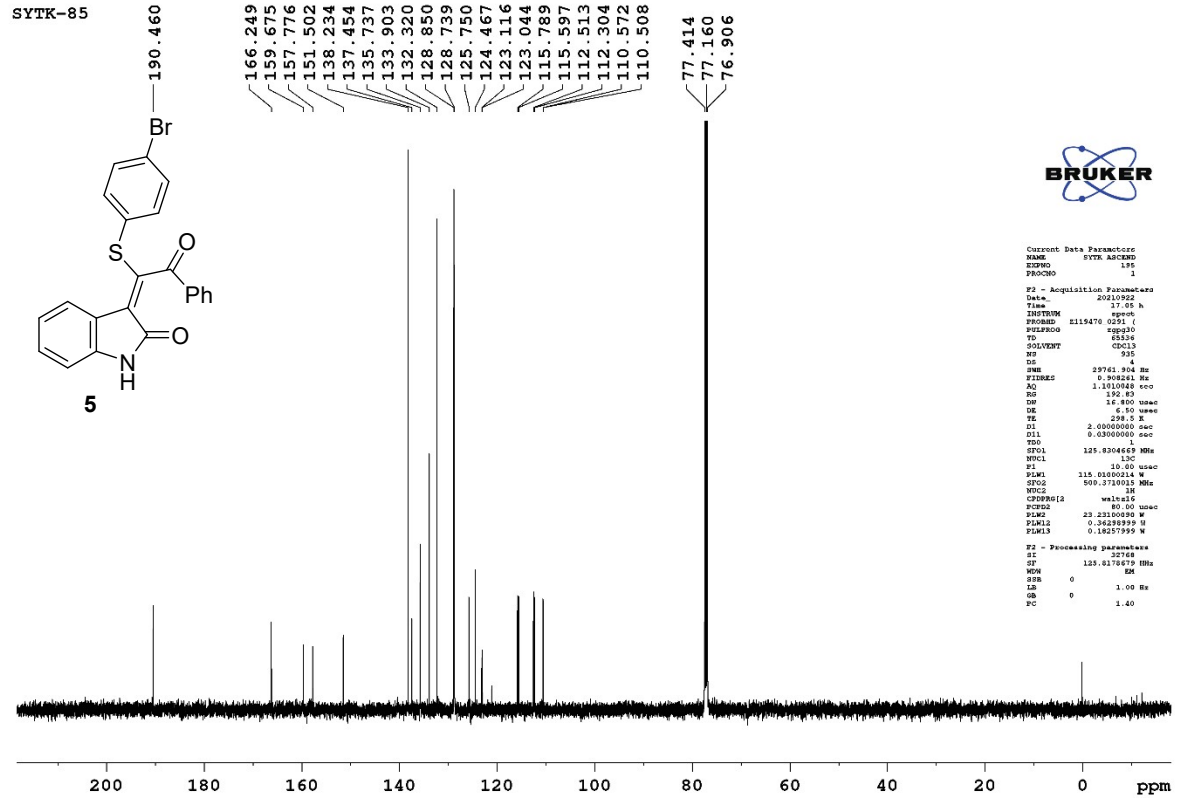



SYTK-85

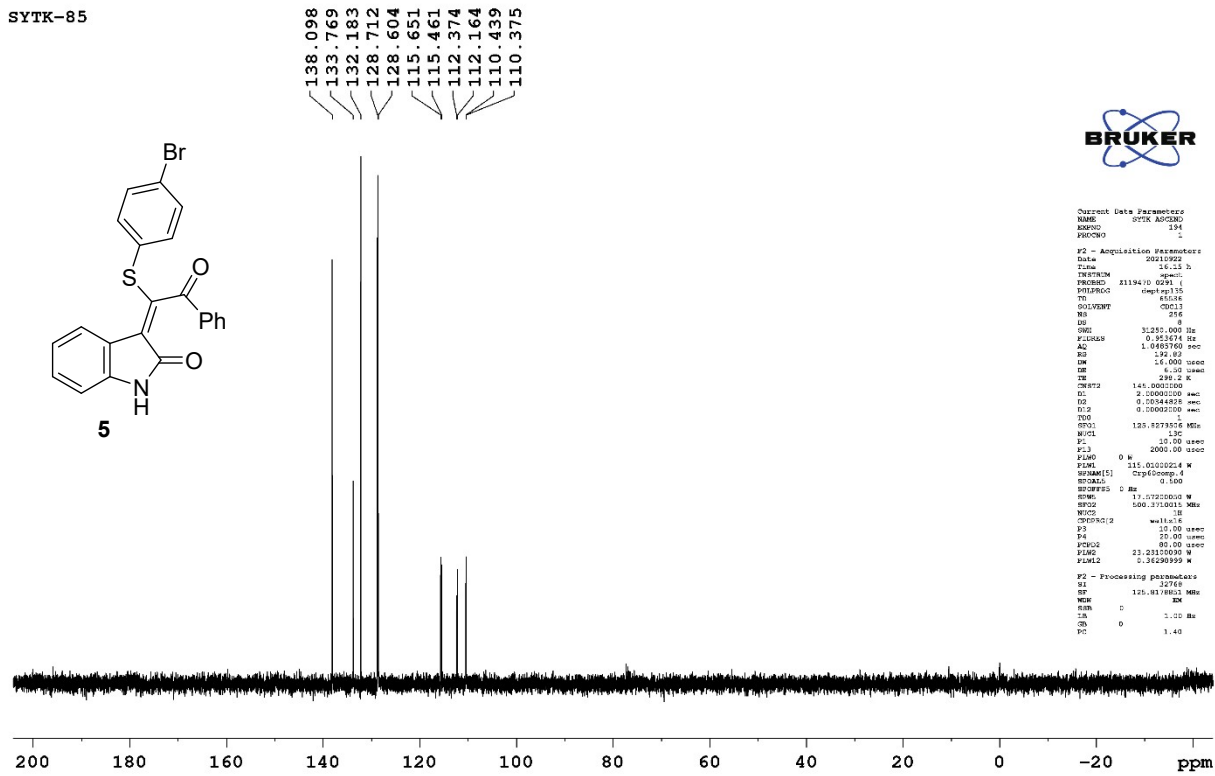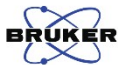

```

Current Date Parameters
NAME: sytk_85
PROCNO: 1
PROC9: 1

F2 - Acquisition Parameters
Date_ 20210922
Time 16:11 h
INSTRUM spect
PROBHD: EBB-5mm
PULPROG zgpg30
TD 65536
SOLVENT cdm3
NS 256
DS 4
SFO1 125.7612500 MHz
F2ACQ99 0.92476 Hz
AQ 1.0493760 sec
RG 328.00
DM 1.6000 usec
DE 6.00 usec
TE 296.2 K
CMT2 145.0000000
IC 2.000000000
IG 0.000000000
D12 0.000000000
TD0 1
SFO1 125.7612500 MHz
NUC1 13
PC 10.00 usec
PC9 2000.00 usec
P1M0 0 W
P1M1 115.0000021 W
SFO1M1 125.7612500 MHz
PC1M1 0.100
SFO1M2 500.1300010 MHz
SFO2 500.1300010 MHz
SFO2M2 500.1300010 MHz
PC2M2 0.100 usec
P4 20.00 usec
SFO4 80.00 usec
P1M2 23.23150000 W
SFO1M2 0.10280000 W

F2 - Processing parameters
SI 32768
SF 125.7612500 MHz
MR 13
AQ 1.0493760
RG 328
DM 1.6000
DE 6.00
TE 296.2
PC 10.00
PC9 2000.00
PC1M1 0.100
PC1M2 23.23150000
PC2M2 0.10280000

```
